# Supplementary material
Source: publisher site journal article supplement (http://oneecosystem.pensoft.net/article/download/suppl/3500182/)
Supplement: Supplementary file 1

Title,Authors,YearOfPublication,Group,Section,ESType,ESImplementation,Scale,Region
A Bayesian network approach to model farmers' crop choice using socio-psychological measurements of expected benefits of ecosystem services,Poppenborg P.; Koellner T.,2014,"Assessment, Cultural Services",Provisioning,Agriculture as supplier of ES,slightly implemented,Local,Asia
"A characterization of the drivers, pressures, ecosystem functions and services of Namatala wetland, Uganda",Namaalwa S.; Van dam A.A.; Funk A.; Ajie G.S.; Kaggwa R.C.,2013,Water,Regulating,Agriculture as user of ES,slightly implemented,Regional,Sub-Saharan Africa
A comparison of land-sharing and land-sparing strategies for plant richness conservation in agricultural landscapes,Egan J.F.; Mortensen D.A.,2012,"Biodiversity, Pollination, Pest Control, Conservation",Regulating,Agriculture as supplier of ES,not implemented,Regional,North America
A farm-scale biodiversity and ecosystem services assessment tool: The healthy farm index,Quinn J.E.; Brandle J.R.; Johnson R.J.,2013,"Biodiversity, Pollination, Pest Control, Conservation",Several,Several,fully implemented,Regional,North America
A framework for assessing local PES proposals,Page G.; Ridoutt B.; Creeper D.; Bellotti B.,2015,"Assessment, Cultural Services",Regulating,Agriculture causes negative effects,fully implemented,,Australia and New Zealand
A framework for evaluating ecosystem services provided by cover crops in agroecosystems,Schipanski M.E.; Barbercheck M.; Douglas M.R.; Finney D.M.; Haider K.; Kaye J.P.; Kemanian A.R.; Mortensen D.A.; Ryan M.R.; Tooker J.; White C.,2014,Other articles,Several,Several,fully implemented,Local,North America
A framework for the assessment of ecosystem goods and services; a case study on lowland floodplains in England,Posthumus H.; Rouquette J.R.; Morris J.; Gowing D.J.G.; Hess T.M.,2010,"Assessment, Cultural Services",Several,Several,fully implemented,Local,Europe
A general equilibrium model of ecosystem services in a river basin,Warziniack T.,2014,"Policy, Institutions, Governmental",Provisioning,Agriculture causes negative effects,fully implemented,Local,North America
A global meta-analysis of the biodiversity and ecosystem service benefits of coffee and cacao agroforestry,De Beenhouwer M.; Aerts R.; Honnay O.,2013,"Biodiversity, Pollination, Pest Control, Conservation",Several,Several,slightly implemented,Global,
A global quantitative synthesis of local and landscape effects on wild bee pollinators in agroecosystems,Kennedy C.M.; Lonsdorf E.; Neel M.C.; Williams N.M.; Ricketts T.H.; Winfree R.; Bommarco R.; Brittain C.; Burley A.L.; Cariveau D.; Carvalheiro L.G.; Chacoff N.P.; Cunningham S.A.; Danforth B.N.; Dudenh_ffer J.-H.; Elle E.; Gaines H.R.; Garibaldi L.A.; Gratton C.; Holzschuh A.; Isaacs R.; Javorek S.K.; Jha S.; Klein A.M.; Krewenka K.; Mandelik Y.; Mayfield M.M.; Morandin L.; Neame L.A.; Otieno M.; Park M.; Potts S.G.; Rundl_f M.; Saez A.; Steffan-Dewenter I.; Taki H.; Viana B.F.; Westphal C.; Wilson J.K.; Greenleaf S.S.; Kremen C.,2013,"Biodiversity, Pollination, Pest Control, Conservation",Regulating,Agriculture causes negative effects,slightly implemented,Global,
A macro-scale perspective on within-farm management: How climate and topography alter the effect of farming practices,Amano T.; Kusumoto Y.; Okamura H.; Baba Y.G.; Hamasaki K.; Tanaka K.; Yamamoto S.,2011,"Biodiversity, Pollination, Pest Control, Conservation",Provisioning,Agriculture as supplier of ES,slightly implemented,Local,Asia
A mapping approach to assess intangible cultural ecosystem services: The case of agriculture heritage in Southern Chile,Nahuelhual L.; Carmona A.; Laterra P.; Barrena J.; Aguayo M.,2014,"Assessment, Cultural Services",Cultural,Agriculture as supplier of ES,fully implemented,Regional,Latin America
A meta-analysis of crop pest and natural enemy response to landscape complexity,Chaplin-Kramer R.; O'Rourke M.E.; Blitzer E.J.; Kremen C.,2011,"Biodiversity, Pollination, Pest Control, Conservation",Regulating,Agriculture as user of ES,fully implemented,Global,
A meta-analysis of experiments testing the effects of a neonicotinoid insecticide (imidacloprid) on honey bees,Cresswell J.E.,2011,"Biodiversity, Pollination, Pest Control, Conservation",Regulating,Agriculture causes negative effects,not implemented,,
A method to assess ecosystem services developed from soil attributes with stakeholders and data of four arable farms,Rutgers M.; van Wijnen H.J.; Schouten A.J.; Mulder C.; Kuiten A.M.P.; Brussaard L.; Breure A.M.,2012,Soil,Regulating,Agriculture as supplier of ES,fully implemented,Local,Europe
A methodological approach for deriving regional crop rotations as basis for the assessment of the impact of agricultural strategies using soil erosion as example,Lorenz M.; FÙrst C.; Thiel E.,2013,Soil,Regulating,Agriculture as supplier of ES,fully implemented,Regional,Europe
A multi-scale assessment of hurricane impacts on agricultural landscapes based on land use and topographic features,Philpott S.M.; Lin B.B.; Jha S.; Brines S.J.,2008,Soil,Regulating,Agriculture as supplier of ES,not implemented,Regional,Latin America
"A multi-scale, landscape approach to predicting insect populations in agroecosystems",O'Rourke M.E.; Rienzo-Stack K.; Power A.G.,2011,"Biodiversity, Pollination, Pest Control, Conservation",Regulating,Agriculture as user of ES,slightly implemented,Local,North America
"A parametric approach to assess the sustainability of land consolidation: A case study in Shandong Province, North China",Zhang Z.; Zhao W.,2013,"Assessment, Cultural Services",Several,Agriculture causes negative effects,slightly implemented,Local,Asia
A role for agroforestry in forest restoration in the lower Mississippi Alluvial Valley,Dosskey M.G.; Bentrup G.; Schoeneberger M.,2012,"Biodiversity, Pollination, Pest Control, Conservation",Several,Several,not implemented,Regional,North America
A scale-explicit framework for conceptualizing the environmental impacts of agricultural land use changes,Hale I.L.; Wollheim W.M.; Smith R.G.; Asbjornsen H.; Brito A.F.; Broders K.; Stuart Grandy A.; Rowe R.,2014,Carbon and Nitrogen compounds,Regulating,Several,fully implemented,Regional,North America
A social contract with the ancestors-Culture and ecosystem services in southern Madagascar,Von Heland J.; Folke C.,2014,"Assessment, Cultural Services",Provisioning,Agriculture as supplier of ES,slightly implemented,Local,Sub-Saharan Africa
A social-ecological approach to managing multiple agro-ecosystem services,Lescourret F.; Magda D.; Richard G.; Adam-Blondon A.-F.; Bardy M.; Baudry J.; Doussan I.; Dumont B.; Lefvre F.; Litrico I.; Martin-Clouaire R.; Montuelle B.; Pellerin S.; Plantegenest M.; Tancoigne E.; Thomas A.; Guyomard H.; Soussana J.-F.,2015,"Policy, Institutions, Governmental",Several,Agriculture as supplier of ES,fully implemented,,
A social_ecological analysis of ecosystem services in two different farming systems,Andersson E.; Nykvist B.; Malinga R.; Jaramillo F.; Lindborg R.,2015,"Assessment, Cultural Services",Several,Several,slightly implemented,Local,Europe
A soil change-based methodology for the quantification and valuation of ecosystem services from agro-ecosystems: A case study of pastoral agriculture in New Zealand,Dominati E.; Mackay A.; Green S.; Patterson M.,2014,Soil,Several,Agriculture as supplier of ES,fully implemented,Regional,Australia and New Zealand
"A study of wetland hydrology and ecosystem service provision: GaMampa wetland, South Africa",McCartney M.; Morardet S.; Rebelo L.-M.; Finlayson C.M.; Masiyandima M.,2011,"Assessment, Cultural Services",Provisioning,Agriculture causes negative effects,not implemented,Local,Sub-Saharan Africa
"A sustainable agricultural landscape for Australia: A review of interlacing carbon sequestration, biodiversity and salinity management in agroforestry systems",George S.J.; Harper R.J.; Hobbs R.J.; Tibbett M.,2012,Carbon and Nitrogen compounds,Regulating,Agriculture as supplier of ES,fully implemented,Regional,Australia and New Zealand
A theoretical model of agrobiodiversity as a supporting service for sustainable agricultural intensification,Omer A.; Pascual U.; Russell N.,2010,"Biodiversity, Pollination, Pest Control, Conservation",Several,Several,slightly implemented,Regional,Europe
A tropical freshwater wetland: III. Direct use values and other goods and services,Drew W.M.; Ewel K.C.; Naylor R.L.; Sigrah A.,2005,Water,Regulating,Agriculture causes negative effects,fully implemented,Regional,Australia and New Zealand
Accounting for multi-functionality of sheep farming in the carbon footprint of lamb: A comparison of three contrasting Mediterranean systems,Ripoll-Bosch R.; de Boer I.J.M.; Bernu_s A.; Vellinga T.V.,2013,Carbon and Nitrogen compounds,Several,Several,fully implemented,Regional,Europe
Achieving food and environmental security: New approaches to close the gap,Poppy G.M.; Jepson P.C.; Pickett J.A.; Birkett M.A.,2014,"Assessment, Cultural Services",Several,Several,fully implemented,Global,
"Adoption of climate change mitigation practices by risk-averse farmers in the Ashanti Region, Ghana",De Pinto A.; Robertson R.D.; Obiri B.D.,2013,Climate,Regulating,Agriculture as supplier of ES,fully implemented,Local,Sub-Saharan Africa
Adoption of payments for ecosystem services: An application of the H_gerstrand model,van der Horst D.,2011,"Policy, Institutions, Governmental",Regulating,Several,fully implemented,Local,Europe
Agri-environment scheme enhancing ecosystem services: A demonstration of improved biological control in cereal crops,Holland J.M.; Oaten H.; Moreby S.; Birkett T.; Simper J.; Southway S.; Smith B.M.,2012,"Biodiversity, Pollination, Pest Control, Conservation",Regulating,Agriculture as supplier of ES,slightly implemented,Regional,Europe
Agricultural conservation practices and wetland ecosystem services in the wetland-rich Piedmont-Coastal Plain region,De Steven D.; Lowrance R.,2011,"Biodiversity, Pollination, Pest Control, Conservation",Several,Several,slightly implemented,Regional,North America
Agricultural conservation practices increase wetland ecosystem services in the Glaciated Interior Plains,Fennessy S.; Craft C.,2011,Carbon and Nitrogen compounds,Regulating,Agriculture causes negative effects,fully implemented,Regional,North America
"Agricultural drainage ditches, their biological importance and functioning",Herzon I.; Helenius J.,2008,"Biodiversity, Pollination, Pest Control, Conservation",Several,Several,slightly implemented,,
Agricultural intensification drives landscape-context effects on host-parasitoid interactions in agroecosystems,Jonsson M.; Buckley H.L.; Case B.S.; Wratten S.D.; Hale R.J.; Didham R.K.,2012,"Biodiversity, Pollination, Pest Control, Conservation",Regulating,Agriculture as user of ES,fully implemented,Local,Australia and New Zealand
Agricultural landscape simplification does not consistently drive insecticide use,Larsen A.E.,2013,"Biodiversity, Pollination, Pest Control, Conservation",Provisioning,Agriculture causes negative effects,not implemented,Regional,North America
Agricultural landscape structure affects arthropod diversity and arthropod-derived ecosystem services,Mitchell M.G.E.; Bennett E.M.; Gonzalez A.,2014,"Biodiversity, Pollination, Pest Control, Conservation",Regulating,Agriculture as user of ES,slightly implemented,Local,North America
Agricultural practices indirectly influence plant productivity and ecosystem services through effects on soil biota,K_hl L.; Oehl F.; Van Der Heijden M.G.A.,2014,"Biodiversity, Pollination, Pest Control, Conservation",Regulating,Agriculture as supplier of ES,fully implemented,Local,Europe
Agro-ecosystem services and dis-services in almond orchards are differentially influenced by the surrounding landscape,Sch_ckermann J.; Pufal G.; Mandelik Y.; Klein A.-M.,2015,"Biodiversity, Pollination, Pest Control, Conservation",Regulating,Agriculture as user of ES,fully implemented,Local,Middle East and Northern Africa
Agroecology: The key role of arbuscular mycorrhizas in ecosystem services,Gianinazzi S.; Gollotte A.; Binet M.-N.; van Tuinen D.; Redecker D.; Wipf D.,2010,"Biodiversity, Pollination, Pest Control, Conservation",Several,Agriculture as user of ES,fully implemented,Global,
"Agroenergy Crops Influence the Diversity, Biomass, and Guild Structure of Terrestrial Arthropod Communities",Robertson B.A.; Porter C.; Landis D.A.; Schemske D.W.,2012,"Biodiversity, Pollination, Pest Control, Conservation",Regulating,Agriculture as supplier of ES,fully implemented,Regional,North America
Agroforestry and biochar to offset climate change: A review,Stavi I.; Lal R.,2013,Carbon and Nitrogen compounds,Regulating,Agriculture causes negative effects,slightly implemented,Global,
Agroforestry for ecosystem services and environmental benefits: An overview,Jose S.,2009,Carbon and Nitrogen compounds,Regulating,Agriculture as supplier of ES,fully implemented,Global,
Agroforestry in the Western Ghats of peninsular India and the satoyama landscapes of Japan: A comparison of two sustainable land use systems,Kumar B.M.; Takeuchi K.,2009,Carbon and Nitrogen compounds,Regulating,Agriculture as supplier of ES,slightly implemented,Regional,Asia
Agronomic Practices for Improving Gentle Remediation of Trace Element-Contaminated Soils,Kidd P.; Mench M.; lvarez-LÑpez V.; Bert V.; Dimitriou I.; Friesl-Hanl W.; Herzig R.; Olga Janssen J.; Kolbas A.; MÙller I.; Neu S.; Renella G.; Ruttens A.; Vangronsveld J.; Puschenreiter M.,2015,Soil,Regulating,Agriculture as supplier of ES,fully implemented,Global,
"An agent-based approach to modeling impacts of agricultural policy on land use, biodiversity and ecosystem services",Brady M.; Sahrbacher C.; Kellermann K.; Happe K.,2012,"Policy, Institutions, Governmental",Several,Agriculture as supplier of ES,fully implemented,Local,Europe
An analytical framework for assessing the potential of intermediaries to improve the performance of payments for ecosystem services,Schomers S.; Sattler C.; Matzdorf B.,2015,"Policy, Institutions, Governmental",Several,Agriculture as supplier of ES,fully implemented,Regional,Europe
An assessment of market-based approaches to providing ecosystem services on agricultural lands,Kroeger T.; Casey F.,2007,"Policy, Institutions, Governmental",Provisioning,Agriculture as supplier of ES,fully implemented,Global,
An assessment of the English Farm Woodland Premium Scheme and its ability to promote and sustain environmental improvements in agricultural landscapes,Heffernan L.J.; Lassoie J.P.; Bills N.,2011,"Policy, Institutions, Governmental",Several,Several,slightly implemented,Regional,Europe
An ecosystem service-based approach to design agri- environment-climate payments for the rural development programs 2014-2020. The case of the autonomous province of Trento,La Notte A.; Scolozzi R.; Molfetta P.; Gubert F.; Molignoni R.; Franchi R.; Pecile A.,2014,"Biodiversity, Pollination, Pest Control, Conservation",Provisioning,Agriculture as supplier of ES,fully implemented,Local,Europe
"An Ecosystem Services Approach to Sustainable Livelihoods in the Homegardens of Kandy, Sri Lanka",Landreth N.; Saito O.,2014,"Policy, Institutions, Governmental",Several,Several,fully implemented,Local,Asia
An ecosystem services inventory: Lessons from the Northern Negev long-term social ecological research (LTSER) platform,Orenstein D.E.; Groner E.; Argaman E.; Boeken B.; Preisler Y.; Shachak M.; Ungar E.D.; Zaady E.,2012,"Policy, Institutions, Governmental",Several,Agriculture as supplier of ES,fully implemented,Regional,Middle East and Northern Africa
An open framework for agent based modelling of agricultural land use change,Murray-Rust D.; Robinson D.T.; Guillem E.; Karali E.; Rounsevell M.,2014,"Assessment, Cultural Services",Several,Several,slightly implemented,,
Analysis of ecosystem services trade-offs to design agroecosystems with perennial crops,Rapidel B.; Ripoche A.; Allinne C.; Metay A.; Deheuvels O.; Lamanda N.; Blazy J.-M.; Vald_s-GÑmez H.; Gary C.,2015,Other articles,Several,Several,fully implemented,Local,
Analysis of factors influencing farmers' voluntary participation in reforestation programme in Ghana,Danquah J.A.,2015,Other articles,Several,Several,slightly implemented,Local,Sub-Saharan Africa
Analysis of fertilizer subsidy programs and ecosystem services in Malawi,Mhango J.; Dick J.,2011,"Policy, Institutions, Governmental",Several,Several,fully implemented,Regional,Sub-Saharan Africa
Analyzing the Design Process of Farming Practices Ensuring Little Bustard Conservation: Lessons for Collective Landscape Management,Berthet E.T.A.; Bretagnolle V.; Segrestin B.,2012,"Biodiversity, Pollination, Pest Control, Conservation",Regulating,Agriculture as supplier of ES,not implemented,Local,Europe
Anticipating impacts of climate change on organic agriculture,Jaradat A.A.,2012,Climate,Provisioning,Agriculture as user of ES,slightly implemented,Global,
Ants as indicators of soil-based ecosystem services in agroecosystems of the Colombian Llanos,Sanabria C.; Lavelle P.; Fonte S.J.,2014,Soil,Regulating,Agriculture as supplier of ES,slightly implemented,Regional,Latin America
Ants as tools in sustainable agriculture,Offenberg J.,2015,"Biodiversity, Pollination, Pest Control, Conservation",Regulating,Agriculture as user of ES,not implemented,Global,
Ants defend coffee from berry borer colonization,Gonthier D.J.; Ennis K.K.; Philpott S.M.; Vandermeer J.; Perfecto I.,2013,"Biodiversity, Pollination, Pest Control, Conservation",Regulating,Agriculture as user of ES,slightly implemented,Local,Latin America
Application of partial order ranking to identify enhancement potentials for the provision of selected ecosystem services by different land use strategies,Tsonkova P.; B_hm C.; Quinkenstein A.; Freese D.,2015,"Assessment, Cultural Services",Regulating,Several,fully implemented,Local,Europe
Applying the ecosystem services framework to pasture-based livestock farming systems in Europe,RodrÕguez-Ortega T.; Oteros-Rozas E.; Ripoll-Bosch R.; Tichit M.; MartÕn-LÑpez B.; Bernu_s A.,2014,"Assessment, Cultural Services",Several,Several,fully implemented,,Europe
Arboreal ant abundance and leaf miner damage in coffee agroecosystems in Mexico,De La Mora A.; Livingston G.; Philpott S.M.,2008,"Policy, Institutions, Governmental",Regulating,Agriculture as user of ES,fully implemented,Local,Latin America
Are socioeconomic benefits of restoration adequately quantified? a meta-analysis of recent papers (2000-2008) in restoration ecology and 12 other scientific journals,Aronson J.; Blignaut J.N.; Milton S.J.; Le Maitre D.; Esler K.J.; Limouzin A.; Fontaine C.; de Wit M.P.; Mugido W.; Prinsloo P.; van der Elst L.; Lederer N.,2010,"Policy, Institutions, Governmental",Several,Several,fully implemented,Global,
Assessing and visualizing agricultural management practices: A multivariable hands-on approach for education and extension,Smith R.G.; Gareau T.P.; Mortensen D.A.; Curran W.S.; Barbercheck M.E.,2011,"Assessment, Cultural Services",Regulating,Agriculture as supplier of ES,not implemented,Local,North America
Assessing biodiversity on the farm scale as basis for ecosystem service payments,von Haaren C.; Kempa D.; Vogel K.; RÙter S.,2012,"Policy, Institutions, Governmental",Regulating,Agriculture as supplier of ES,fully implemented,Local,Europe
Assessing Risks and Opportunities Arising from Ecosystem Change in Primary Industries Using Ecosystem-Based Business Risk Analysis Tool,Sandhu H.; Nidumolu U.; Sandhu S.,2012,"Assessment, Cultural Services",Several,Several,fully implemented,Local,Australia and New Zealand
"Assessing the changes in land use and ecosystem services in an oasis agricultural region of Yanqi Basin, Northwest China",Wang S.; Wu B.; Yang P.,2014,"Assessment, Cultural Services",Several,Agriculture causes negative effects,fully implemented,Local,Asia
Assessing the ecosystem services supplied by freshwater flows in Mediterranean agroecosystems,Willaarts B.A.; Volk M.; Aguilera P.A.,2012,Water,Regulating,Agriculture as supplier of ES,fully implemented,Regional,Europe
Assessing the role of economic actors in the production of private and public goods in three EU agricultural landscapes,Villanueva A.J.; Targetti S.; Schaller L.; Arriaza M.; Kantelhardt J.; Rodriguez-Entrena M.; Bossi-Fedrigotti V.; Viaggi D.,2015,"Assessment, Cultural Services",Several,Agriculture as supplier of ES,slightly implemented,Regional,Europe
Assessing the significance of soil erosion for arable weed seedbank diversity in agro-ecosystems,Lewis T.D.; Rowan J.S.; Hawes C.; McKenzie B.M.,2013,"Biodiversity, Pollination, Pest Control, Conservation",Regulating,Agriculture causes negative effects,fully implemented,Regional,Europe
Assessment of carbon in woody plants and soil across a vineyard-woodland landscape,Williams J.N.; Hollander A.D.; O'Geen A.T.; Thrupp L.A.; Hanifin R.; Steenwerth K.; McGourty G.; Jackson L.E.,2011,Carbon and Nitrogen compounds,Regulating,Agriculture as supplier of ES,slightly implemented,Local,North America
"Assessment of ecosystem services and dis-services of an agro-ecosystem based on extended emergy framework: A case study of Luancheng county, North China",Ma F.; Eneji A.; Liu J.,2015,"Assessment, Cultural Services",Several,Several,slightly implemented,Local,Asia
"Assessment of ecosystem services in homegarden systems in Indonesia, Sri Lanka, and Vietnam",Mohri H.; Lahoti S.; Saito O.; Mahalingam A.; Gunatilleke N.; Irham; Hoang V.T.; Hitinayake G.; Takeuchi K.; Herath S.,2013,"Assessment, Cultural Services",Several,Several,slightly implemented,Regional,Asia
Augmenting flower trait diversity in wildflower strips to optimise the conservation of arthropod functional groups for multiple agroecosystem services,Balzan M.V.; Bocci G.; Moonen A.-C.,2014,"Biodiversity, Pollination, Pest Control, Conservation",Regulating,Agriculture as supplier of ES,slightly implemented,Local,Europe
Avian foraging behaviour in relation to provision of ecosystem services in a highland East African agroecosystem,Kariuki Ndang'Ang'A P.; Njoroge J.B.M.; Ngamau K.; Kariuki W.; Atkinson P.W.; Vickery J.,2013,"Biodiversity, Pollination, Pest Control, Conservation",Regulating,Agriculture as user of ES,fully implemented,Local,Sub-Saharan Africa
Avian species identity drives predation success in tropical cacao agroforestry,Maas B.; Tscharntke T.; Saleh S.; Dwi Putra D.; Clough Y.,2015,"Biodiversity, Pollination, Pest Control, Conservation",Regulating,Agriculture as user of ES,fully implemented,Local,Asia
Bacterial _-glucosidase function and metabolic activity depend on soil management in semiarid rainfed agriculture,CaÐizares R.; Moreno B.; Benitez E.,2012,"Biodiversity, Pollination, Pest Control, Conservation",Regulating,Agriculture causes negative effects,not implemented,Local,Europe
"Balance between food production, biodiversity and ecosystem services in brazil: A challenge and an opportunity",Martinelli L.A.; Filoso S.,2009,"Biodiversity, Pollination, Pest Control, Conservation",Several,Several,not implemented,Regional,Latin America
Balancing ecosystem services and disservices: Smallholder farmers' use and management of forest and trees in an agricultural landscape in southwestern Ethiopia,Ango T.G.; B_rjeson L.; Senbeta F.; Hylander K.,2014,"Biodiversity, Pollination, Pest Control, Conservation",Several,Several,fully implemented,Regional,Sub-Saharan Africa
Bats and birds increase crop yield in tropical agroforestry landscapes,Maas B.; Clough Y.; Tscharntke T.,2013,"Biodiversity, Pollination, Pest Control, Conservation",Regulating,Agriculture as user of ES,slightly implemented,Local,Asia
Bats initiate vital agroecological interactions in corn,Mainea J.J.; Boylesa J.G.,2015,"Biodiversity, Pollination, Pest Control, Conservation",Regulating,Agriculture as user of ES,not implemented,Regional,North America
Bee Preference for Native versus Exotic Plants in Restored Agricultural Hedgerows,Morandin L.A.; Kremen C.,2013,"Biodiversity, Pollination, Pest Control, Conservation",Regulating,Several,slightly implemented,Local,North America
Beekeeping and farming _ dependence and contradiction,Lichtsteiner S.; Oehen B.,2015,"Biodiversity, Pollination, Pest Control, Conservation",Regulating,Agriculture causes negative effects,not implemented,Local,Europe
"Better land-use allocation outperforms land sparing and land sharing approaches to conservation in Central Kalimantan, Indonesia",Law E.A.; Meijaard E.; Bryan B.A.; Mallawaarachchi T.; Koh L.P.; Wilson K.A.,2015,"Biodiversity, Pollination, Pest Control, Conservation",Several,Several,fully implemented,Regional,Asia
"Beyond food production: Ecosystem services provided by home gardens. A case study in Vall Fosca, Catalan Pyrenees, Northeastern Spain",Calvet-Mir L.; GÑmez-Baggethun E.; Reyes-GarcÕa V.,2012,"Assessment, Cultural Services",Provisioning,Agriculture as supplier of ES,slightly implemented,Regional,Europe
Beyond reserves: A research agenda for conserving biodiversity in human-modified tropical landscapes,Chazdon R.L.; Harvey C.A.; Komar O.; Griffith D.M.; Ferguson B.G.; MartÕnez-Ramos M.; Morales H.; Nigh R.; Soto-Pinto L.; Van Breugel M.; Philpott S.M.,2009,"Biodiversity, Pollination, Pest Control, Conservation",Several,Several,fully implemented,,
Biodiversity and multiple ecosystem functions in an organic farmscape,Smukler S.M.; Sànchez-Moreno S.; Fonte S.J.; Ferris H.; Klonsky K.; O'Geen A.T.; Scow K.M.; Steenwerth K.L.; Jackson L.E.,2010,"Biodiversity, Pollination, Pest Control, Conservation",Several,Several,slightly implemented,Local,North America
"Biodiversity conservation in human-modified landscapes of Mesoamerica: Past, present and future",DeClerck F.A.J.; Chazdon R.; Holl K.D.; Milder J.C.; Finegan B.; Martinez-Salinas A.; Imbach P.; Canet L.; Ramos Z.,2010,"Biodiversity, Pollination, Pest Control, Conservation",Several,Several,slightly implemented,Regional,Latin America
Biodiversity in a forest-agriculture mosaic - The changing face of West African rainforests,Norris K.; Asase A.; Collen B.; Gockowksi J.; Mason J.; Phalan B.; Wade A.,2010,"Biodiversity, Pollination, Pest Control, Conservation",Several,Several,not implemented,Regional,Sub-Saharan Africa
"Biodiversity in rubber agroforests, carbon emissions, and rural livelihoods: An agent-based model of land-use dynamics in lowland Sumatra",Villamor G.B.; Le Q.B.; Djanibekov U.; van Noordwijk M.; Vlek P.L.G.,2014,"Biodiversity, Pollination, Pest Control, Conservation",Regulating,Agriculture as supplier of ES,fully implemented,Regional,Asia
Biodiversity provides ecosystem services: Scientific results versus stakeholders' knowledge,Lugnot M.; Martin G.,2013,"Biodiversity, Pollination, Pest Control, Conservation",Several,Several,fully implemented,,Europe
"Bioenergy, Food Production and Biodiversity - An Unlikely Alliance?",Manning P.; Taylor G.; Hanley M.E.,2015,"Policy, Institutions, Governmental",Several,Agriculture as supplier of ES,slightly implemented,Global,
Biofuels as a new energy paradigm: The key points of debate after a decade,Castiblanco C.; Etter A.,2013,"Policy, Institutions, Governmental",Several,Agriculture causes negative effects,fully implemented,,
"Biofuels: Efficiency, Ethics, and Limits to Human Appropriation of Ecosystem Services",Gomiero T.; Paoletti M.G.; Pimentel D.,2010,Other articles,Regulating,Agriculture causes negative effects,fully implemented,Global,
Biological control as an ecosystem service: Partitioning contributions of nature and human inputs to yield,Bengtsson J.,2015,"Biodiversity, Pollination, Pest Control, Conservation",Regulating,Several,fully implemented,Regional,Europe
Biological pest control and yields depend on spatial and temporal crop cover dynamics,Schneider G.; Krauss J.; Riedinger V.; Holzschuh A.; Steffan-Dewenter I.,2015,"Biodiversity, Pollination, Pest Control, Conservation",Regulating,Several,not implemented,Local,Europe
"Bird functional diversity and ecosystem services in tropical forests, agroforests and agricultural areas",Sekercioglu C.H.,2012,"Biodiversity, Pollination, Pest Control, Conservation",Regulating,Agriculture as supplier of ES,not implemented,,
Birds defend oil palms from herbivorous insects,Koh L.P.,2008,"Biodiversity, Pollination, Pest Control, Conservation",Regulating,Several,slightly implemented,Local,Asia
Both forest fragmentation and coffee cultivation negatively affect epiphytic orchid diversity in Ethiopian moist evergreen Afromontane forests,Hundera K.; Aerts R.; Beenhouwer M.; Overtveld K.; Helsen K.; Muys B.; Honnay O.,2013,"Biodiversity, Pollination, Pest Control, Conservation",Cultural,Several,not implemented,Local,Sub-Saharan Africa
Breeding Annual Grain Legumes for Sustainable Agriculture: New Methods to Approach Complex Traits and Target New Cultivar Ideotypes,Duc G.; Agrama H.; Bao S.; Berger J.; Bourion V.; De Ron A.M.; Gowda C.L.L.; Mikic A.; Millot D.; Singh K.B.; Tullu A.; Vandenberg A.; Vaz Patto M.C.; Warkentin T.D.; Zong X.,2015,Other articles,Several,Several,fully implemented,Global,
"Buffers for biomass production in temperate European agriculture: A review and synthesis on function, ecosystem services and implementation",Christen B.; Dalgaard T.,2013,"Biodiversity, Pollination, Pest Control, Conservation",Several,Several,fully implemented,,
Building resilience to water scarcity in southern Spain: A case study of rice farming in DoÐana protected wetlands,GarcÕa de JalÑn S.; Iglesias A.; Cunningham R.; P_rez DÕaz J.I.,2014,Water,Regulating,Agriculture as user of ES,slightly implemented,Regional,Europe
Bumble bee pollen use and preference across spatial scales in human-altered landscapes,Jha S.; Stefanovich L.; Kremen C.,2013,"Biodiversity, Pollination, Pest Control, Conservation",Regulating,Agriculture causes negative effects,not implemented,Local,North America
Can ecosystem services be integrated with conservation? A case study of breeding waders on grassland,Rhymer C.M.; Robinson R.A.; Smart J.; Whittingham M.J.,2010,"Biodiversity, Pollination, Pest Control, Conservation",Several,Agriculture as supplier of ES,slightly implemented,Regional,Europe
Can macrophyte harvesting from eutrophic water close the loop on nutrient loss from agricultural land?,Quilliam R.S.; van Niekerk M.A.; Chadwick D.R.; Cross P.; Hanley N.; Jones D.L.; Vinten A.J.A.; Willby N.; Oliver D.M.,2015,Water,Provisioning,Agriculture as user of ES,fully implemented,Regional,Europe
Can pastureland increase wild bee abundance in agriculturally intense areas?,Morandin L.A.; Winston M.L.; Abbott V.A.; Franklin M.T.,2007,"Biodiversity, Pollination, Pest Control, Conservation",Regulating,Several,fully implemented,Local,North America
Can the concept of ecosystem services be practically applied to improve natural resource management decisions?,Wainger L.A.; King D.M.; Mack R.N.; Price E.W.; Maslin T.,2010,"Biodiversity, Pollination, Pest Control, Conservation",Several,Several,fully implemented,Regional,North America
Capabilities of high resolution satellite radar for the detection of semi-natural habitat structures and grasslands in agricultural landscapes,Bargiel D.,2013,"Biodiversity, Pollination, Pest Control, Conservation",Several,Agriculture causes negative effects,not implemented,Regional,Europe
Capitalizing on the carbon sequestration potential of agroforestry in Germany's agricultural landscapes: Realigning the climate change mitigation and landscape conservation agendas,Tobias P.,2011,Carbon and Nitrogen compounds,Regulating,Agriculture as supplier of ES,slightly implemented,Regional,Europe
Carbon management in dryland agricultural systems. A review,Plaza-Bonilla D.; ArrÏe J.L.; Cantero-MartÕnez C.; Fanlo R.; Iglesias A.; lvaro-Fuentes J.,2015,Carbon and Nitrogen compounds,Regulating,Several,fully implemented,Global,
Carbon sequestration and riparian zones: Assessing the impacts of changing regulatory practices in Southern Brazil,GarrastazÏ M.C.; Mendona S.D.; Horokoski T.T.; Cardoso D.J.; Rosot M.A.D.; Nimmo E.R.; Lacerda A.E.B.,2015,Carbon and Nitrogen compounds,Regulating,Agriculture causes negative effects,fully implemented,Regional,Latin America
"Carbon storage in soil size fractions under Two cacao agroforestry systems in Bahia, Brazil",Gama-Rodrigues E.F.; Nair P.K.R.; Nair V.D.; Gama-Rodrigues A.C.; Baligar V.C.; Machado R.C.R.,2010,Carbon and Nitrogen compounds,Regulating,Agriculture as supplier of ES,slightly implemented,Local,Latin America
Challenges for maintaining sustainable agricultural systems in the United States,Hanson J.D.; Hendrickson J.; Archer D.,2008,"Policy, Institutions, Governmental",Several,Several,not implemented,Regional,North America
Changes in pesticide useand arthropod biodiversity in the IRRI research farm,Heong K.L.; Manza A.; Catindig J.; Villareal S.; Jacobsen T.,2007,"Biodiversity, Pollination, Pest Control, Conservation",Regulating,Several,slightly implemented,Regional,Asia
"Changes resulting from a land consolidation project (LCP) and its resource-environment effects: A case study in Tianmen City of Hubei Province, China",Zhang Z.; Zhao W.; Gu X.,2014,"Policy, Institutions, Governmental",Several,Several,fully implemented,Local,Asia
Co-benefits of planting species mixes in carbon projects,Standish R.J.; Hulvey K.B.,2014,Carbon and Nitrogen compounds,Regulating,Agriculture as supplier of ES,fully implemented,Regional,Australia and New Zealand
"Co-benefits, trade-offs, barriers and policies for greenhouse gas mitigation in the agriculture, forestry and other land use (AFOLU) sector",Bustamante M.; Robledo-Abad C.; Harper R.; Mbow C.; Ravindranat N.H.; Sperling F.; Haberl H.; Pinto A.S.; Smith P.,2014,"Policy, Institutions, Governmental",Several,Agriculture causes negative effects,fully implemented,Global,
Collective Action Dynamics under External Rewards: Experimental Insights from Andean Farming Communities,Narloch U.; Pascual U.; Drucker A.G.,2012,"Policy, Institutions, Governmental",Several,Agriculture as supplier of ES,not implemented,Regional,Latin America
Combinatorial auctions for procuring agri-environmental services: A review of some design issues,Iftekhar S.; Hailu A.; Lindner B.,2012,"Policy, Institutions, Governmental",Several,Agriculture as supplier of ES,not implemented,local,
Combining a typology and a conceptual model of cropping system to explore the diversity of relationships between ecosystem services: The case of erosion control in coffee-based agroforestry systems in Costa Rica,Meylan L.; Merot A.; Gary C.; Rapidel B.,2013,Other articles,Several,Agriculture as supplier of ES,fully implemented,Local,Latin America
Combining high biodiversity with high yields in tropical agroforests,Clough Y.; Barkmann J.; Juhrbandt J.; Kessler M.; Wanger T.C.; Anshary A.; Buchori D.; Cicuzza D.; Darras K.; Dwi Putra D.; Erasmi S.; Pitopang R.; Schmidt C.; Schulze C.H.; Seidel D.; Steffan-Dewenter I.; Stenchly K.; Vidal S.; Weist M.; Wielgoss A.C.; Tscharntke T.,2011,"Biodiversity, Pollination, Pest Control, Conservation",Regulating,Several,not implemented,Local,Asia
Commentary: Developing sustainable farming systems by valuing ecosystem services,Goulding K.; Whitmore A.,2012,"Policy, Institutions, Governmental",Several,Several,fully implemented,,Europe
Communicating spatial planning decisions at the landscape and farm level with landscape visualization,Warren-Kretzschmar B.; Haaren C.V.,2014,"Policy, Institutions, Governmental",,Agriculture as supplier of ES,not implemented,Local,Europe
Comparative review of multifunctionality and ecosystem services in sustainable agriculture,Huang J.; Tichit M.; Poulot M.; Darly S.; Li S.; Petit C.; Aubry C.,2015,"Policy, Institutions, Governmental",Several,Several,fully implemented,,
Comparing N2O fluxes from recently created extensive grasslands and sites remaining under intensive agricultural management,Horrocks C.A.; Dungait J.A.J.; Heal K.V.; Cardenas L.M.,2015,Carbon and Nitrogen compounds,Regulating,Agriculture causes negative effects,slightly implemented,Regional,Europe
Complementary ecosystem services provided by pest predators and pollinators increase quantity and quality of coffee yields,Classen A.; Peters M.K.; Ferger S.W.; Helbig-Bonitz M.; Schmack J.M.; Maassen G.; Schleuning M.; Kalko E.K.V.; B_hning-Gaese K.; Steffan-Dewenter I.,2014,"Biodiversity, Pollination, Pest Control, Conservation",Regulating,Agriculture as user of ES,fully implemented,Local,Sub-Saharan Africa
Confronting and resolving competing values behind conservation objectives,Karp D.S.; Mendenhall C.D.; Callaway E.; Frishkoff L.O.; Kareiva P.M.; Ehrlich P.R.; Daily G.C.,2015,"Biodiversity, Pollination, Pest Control, Conservation",Several,Several,fully implemented,Regional,Latin America
Connecting payments for ecosystem services and agri-environment regulation: An analysis of the Welsh Glastir Scheme,Wynne-Jones S.,2013,"Policy, Institutions, Governmental",Several,Agriculture as supplier of ES,fully implemented,Local,Europe
Connecting social networks with ecosystem services for watershed governance: A social-ecological network perspective highlights the critical role of bridging organizations,Rathwell K.J.; Peterson G.D.,2012,Water,Provisioning,Agriculture causes negative effects,not implemented,Regional,North America
Conservation agriculture and ecosystem services: An overview,Palm C.; Blanco-Canqui H.; DeClerck F.; Gatere L.; Grace P.,2014,Carbon and Nitrogen compounds,Regulating,Agriculture as supplier of ES,fully implemented,Global,
"Conservation payments, liquidity constraints, and off-farm labor: Impact of the grain-for-green program on rural households in China",Uchida E.; Rozelle S.; Xu J.,2009,"Policy, Institutions, Governmental",Several,Several,slightly implemented,Local,Asia
"Conservation Value, Management and Restoration of Europe'S Semi-Natural Open Landscapes",Carboni M.; Dengler J.; Mantilla-Contreras J.; Venn S.; T_r_k P.,2015,"Biodiversity, Pollination, Pest Control, Conservation",Several,Several,slightly implemented,Regional,Europe
Conserving Biodiversity Through Certification of Tropical Agroforestry Crops at Local and Landscape Scales,Tscharntke T.; Milder J.C.; Schroth G.; Clough Y.; Declerck F.; Waldron A.; Rice R.; Ghazoul J.,2015,"Biodiversity, Pollination, Pest Control, Conservation",Several,Several,slightly implemented,Regional,Latin America
Contrasting Patterns of Species Richness and Composition of Solitary Wasps and Bees (Insecta: Hymenoptera) According to Land-use,Batista Matos M.C.; Sousa-Souto L.; Almeida R.S.; Teodoro A.V.,2013,"Biodiversity, Pollination, Pest Control, Conservation",Regulating,Agriculture causes negative effects,not implemented,Local,Latin America
Contribution of insect pollinators to crop yield and quality varies with agricultural intensification,Bartomeus I.; Potts S.G.; Steffan-Dewenter I.; Vaissire B.E.; Woyciechowski M.; Krewenka K.M.; Tscheulin T.; Roberts S.P.M.; Szentgy_rgyi H.; Westphal C.; Bommarco R.,2014,"Biodiversity, Pollination, Pest Control, Conservation",Regulating,Agriculture as user of ES,fully implemented,Local,Europe
Converting natural vegetation to farmland alters functional structure of ground-dwelling beetles and spiders in a desert oasis,Li F.-R.; Liu J.-L.; Sun T.-S.; Jin B.-W.; Chen L.-J.,2014,"Biodiversity, Pollination, Pest Control, Conservation",Regulating,Several,not implemented,Local,Asia
"Cooperative management and its effects on shade tree diversity, soil properties and ecosystem services of coffee plantations in western El Salvador",M_ndez V.E.; Shapiro E.N.; Gilbert G.S.,2009,Soil,Regulating,Agriculture as supplier of ES,slightly implemented,Regional,Latin America
Cost of reactive nitrogen release from human activities to the environment in the United States,Sobota D.J.; Compton J.E.; McCrackin M.L.; Singh S.,2015,Carbon and Nitrogen compounds,Regulating,Agriculture causes negative effects,fully implemented,Regional,North America
Cost-oriented evaluation of ecosystem services under consideration ofincome risks and risk attitudes of farmers,D_rschner T.; Musshoff O.,2013,"Policy, Institutions, Governmental",Cultural,Agriculture as supplier of ES,slightly implemented,Local,Europe
Creating patches of native flowers facilitates crop pollination in large agricultural fields: Mango as a case study,Carvalheiro L.G.; Seymour C.L.; Nicolson S.W.; Veldtman R.,2012,"Biodiversity, Pollination, Pest Control, Conservation",Regulating,Several,fully implemented,Local,Sub-Saharan Africa
Credit-Based Payments for Ecosystem Services: Evidence from a Choice Experiment in Ecuador,Cranford M.; Mourato S.,2014,"Policy, Institutions, Governmental",Several,Several,fully implemented,Local,Latin America
Crop pollinators in Brazil: a review of reported interactions,Giannini T.C.; Boff S.; Cordeiro G.D.; Cartolano E.A.; Veiga A.K.; Imperatriz-Fonseca V.L.; Saraiva A.M.,2015,"Biodiversity, Pollination, Pest Control, Conservation",Regulating,Agriculture as user of ES,slightly implemented,,
Crop rotations including ley and manure can promote ecosystem services in conventional farming systems,Albizua A.; Williams A.; Hedlund K.; Pascual U.,2015,Soil,Several,Agriculture as supplier of ES,fully implemented,Regional,Europe
"Crop, field boundary, productivity and disturbance influences on ground beetles (Coleoptera, Carabidae) in the agroecosystem",Eyre M.D.; Luff M.L.; Leifert C.,2013,"Biodiversity, Pollination, Pest Control, Conservation",Regulating,Several,not implemented,Local,Europe
Cropland expansion facilitated the outbreak of cereal aphids during 1951_2010 in China,Zhao Z.-H.; Ouyang F.; Ge F.,2015,"Biodiversity, Pollination, Pest Control, Conservation",Regulating,Several,not implemented,Regional,Asia
Cross Compliance as payment for public goods? Understanding EU and US agricultural policies,Meyer C.; Matzdorf B.; MÙller K.; Schleyer C.,2014,"Policy, Institutions, Governmental",Several,Several,slightly implemented,Global,
Current status of adoption of no-till farming in the world and some of its main benefits,Derpsch R.; Friedrich T.; Kassam A.; Hongwen L.,2010,Soil,Several,Agriculture as supplier of ES,fully implemented,Global,
Dealing with drought: The challenge of using water system technologies to break dryland poverty traps,Enfors E.I.; Gordon L.J.,2008,Water,Provisioning,Agriculture as user of ES,slightly implemented,Regional,Sub-Saharan Africa
Decision-making by farmers regarding ecosystem services: Factors affecting soil conservation efforts in Costa Rica,Vignola R.; Koellner T.; Scholz R.W.; McDaniels T.L.,2010,Soil,Several,Agriculture as supplier of ES,slightly implemented,Regional,Latin America
Deconstructing the surrogate species concept: A life history approach to the protection of ecosystem services,Banks J.E.; Stark J.D.; Vargas R.I.; Ackleh A.S.,2014,"Biodiversity, Pollination, Pest Control, Conservation",Regulating,Several,not implemented,,
Degradation rate of soil function varies with trajectory of agricultural intensification,Squire G.R.; Hawes C.; Valentine T.A.; Young M.W.,2015,Soil,Several,Agriculture causes negative effects,fully implemented,Regional,Europe
Delivering multiple ecosystem services from Enclosed Farmland in the UK,Firbank L.; Bradbury R.B.; McCracken D.I.; Stoate C.,2013,"Assessment, Cultural Services",Several,Several,fully implemented,Regional,Europe
"Demographic drivers of biomass carbon recovery in degraded perennial tussock grassland, with and without domestic grazing",Holdaway R.J.; Rose A.B.; Newell C.L.; Carswell F.E.,2014,Carbon and Nitrogen compounds,Regulating,Agriculture causes negative effects,not implemented,Local,Australia and New Zealand
Dependence on agriculture and ecosystem services for livelihood in Northeast India and Bhutan: vulnerability to climate change in the Tropical River Basins of the Upper Brahmaputra,Amoako Johnson F.; Hutton C.W.,2014,Climate,Provisioning,Agriculture as supplier of ES,fully implemented,Local,Asia
Design rules for successful governmental payments for ecosystem services: Taking agri-environmental measures in Germany as an example,Meyer C.; Reutter M.; Matzdorf B.; Sattler C.; Schomers S.,2015,"Policy, Institutions, Governmental",Several,Several,fully implemented,Regional,Europe
Designing a Policy Mix and Sequence for Mitigating Agricultural Non-Point Source Pollution in a Water Supply Catchment,Bryan B.A.; Kandulu J.M.,2011,"Policy, Institutions, Governmental",Several,Agriculture causes negative effects,fully implemented,Local,Australia and New Zealand
Designing agricultural landscapes for natural pest control: A transdisciplinary approach in the Hoeksche Waard (The Netherlands),Steingr_ver E.G.; Geertsema W.; van Wingerden W.K.R.E.,2010,"Biodiversity, Pollination, Pest Control, Conservation",Regulating,Agriculture as user of ES,fully implemented,Local,Europe
Designing agroecological transitions; A review,Duru M.; Therond O.; Fares M.,2015,"Policy, Institutions, Governmental",Several,Several,slightly implemented,,
Designing landscapes for performance based on emerging principles in landscape ecology,Lovell S.T.; Johnston D.M.,2009,"Policy, Institutions, Governmental",Several,Several,fully implemented,,
Designing payments for ecosystem services (PES) program to reduce deforestation in Tanzania: An assessment of payment approaches,Kaczan D.; Swallow B.M.; Adamowicz W.L.V.,2013,"Assessment, Cultural Services",Regulating,Agriculture as user of ES,fully implemented,Local,Sub-Saharan Africa
Detecting land use and land cover changes in Northern German agricultural landscapes to assess ecosystem service dynamics,Kandziora M.; D_rnh_fer K.; Oppelt N.; MÙller F.,2014,"Assessment, Cultural Services",Provisioning,Agriculture as supplier of ES,fully implemented,Local,Europe
Determinants affecting farmers' willingness to cooperate to control pests,Stallman H.R.; James H.S. Jr.,2015,"Policy, Institutions, Governmental",Regulating,Several,fully implemented,Local,North America
Different management of larch grasslands in the European Alps shows low impact on above- and belowground carbon stocks,Nagler M.; Fontana V.; Lair G.J.; Radtke A.; Tasser E.; Zerbe S.; Tappeiner U.,2015,Carbon and Nitrogen compounds,Regulating,Agriculture as supplier of ES,slightly implemented,Regional,Europe
Digging Deeper: A Case Study of Farmer Conceptualization of Ecosystem Services in the American South,Quinn C.E.; Quinn J.E.; Halfacre A.C.,2015,"Biodiversity, Pollination, Pest Control, Conservation",Several,Several,fully implemented,Regional,North America
Diminishing Returns from Higher Density Restoration Seedings Suggest Trade-offs in Pollinator Seed Mixes,Wilkerson M.L.; Ward K.L.; Williams N.M.; Ullmann K.S.; Young T.P.,2014,"Biodiversity, Pollination, Pest Control, Conservation",Regulating,Agriculture as supplier of ES,slightly implemented,Local,North America
Distance and quality of natural habitat influence hawkmoth pollination of cultivated papaya,Martins D.J.; Johnson S.D.,2009,"Biodiversity, Pollination, Pest Control, Conservation",Regulating,Agriculture as user of ES,fully implemented,Local,Sub-Saharan Africa
Diurnal effectiveness of pollination by bees and flies in agricultural Brassica rapa: Implications for ecosystem resilience,Rader R.; Edwards W.; Westcott D.A.; Cunningham S.A.; Howlett B.G.,2013,"Biodiversity, Pollination, Pest Control, Conservation",Regulating,Agriculture as user of ES,slightly implemented,Local,Australia and New Zealand
DIVECOSYS: Bringing together researchers to design ecologically-based pest management for small-scale farming systems in West Africa,Br_vault T.; Renou A.; Vayssires J.-F.; Amadji G.; Assogba-Komlan F.; Diallo M.D.; De Bon H.; Diarra K.; Hamadoun A.; Huat J.; Marnotte P.; Menozzi P.; Prudent P.; Rey J.-Y.; Sall D.; Silvie P.; Simon S.; Sinzogan A.; Soti V.; Tamo` M.; Clouvel P.,2014,Other articles,Regulating,Agriculture as user of ES,fully implemented,Regional,Sub-Saharan Africa
Diversification and ecosystem services for conservation agriculture: Outcomes from pastures and integrated crop-livestock systems,Sanderson M.A.; Archer D.; Hendrickson J.; Kronberg S.; Liebig M.; Nichols K.; Schmer M.; Tanaka D.; Aguilar J.,2013,Carbon and Nitrogen compounds,Several,Several,fully implemented,Regional,North America
Diversity of wild bees supports pollination services in an urbanized landscape,Lowenstein D.M.; Matteson K.C.; Minor E.S.,2015,"Biodiversity, Pollination, Pest Control, Conservation",Regulating,Agriculture as user of ES,fully implemented,Local,North America
"Diversity, ecosystem function, and stability of parasitoid-host interactions across a tropical habitat gradient",Tylianakis J.M.; Tscharntke T.; Klein A.-M.,2006,"Biodiversity, Pollination, Pest Control, Conservation",Regulating,Agriculture as user of ES,not implemented,Regional,Latin America
Do attitudes toward ecosystem services determine agricultural land use practices? An analysis of farmers' decision-making in a South Korean watershed,Poppenborg P.; Koellner T.,2013,Water,Provisioning,Agriculture causes negative effects,slightly implemented,Regional,Asia
Do differences in food web structure between organic and conventional farms affect the ecosystem service of pest control?,MacFadyen S.; Gibson R.; Polaszek A.; Morris R.J.; Craze P.G.; Planqu_ R.; Symondson W.O.C.; Memmott J.,2009,"Biodiversity, Pollination, Pest Control, Conservation",Regulating,Several,fully implemented,Regional,Europe
Do polycultures promote win-wins or trade-offs in agricultural ecosystem services? A meta-analysis,Iverson A.L.; MarÕn L.E.; Ennis K.K.; Gonthier D.J.; Connor-Barrie B.T.; Remfert J.L.; Cardinale B.J.; Perfecto I.,2014,"Policy, Institutions, Governmental",Several,Agriculture as user of ES,fully implemented,,
Do riparian reserves support dung beetle biodiversity and ecosystem services in oil palm-dominated tropical landscapes?,Gray C.L.; Slade E.M.; Mann D.J.; Lewis O.T.,2014,"Biodiversity, Pollination, Pest Control, Conservation",Regulating,Agriculture as supplier of ES,not implemented,Regional,Asia
Does cadastral division of area-based ecosystem services obstruct comprehensive management?,Vejre H.; Vesterager J.P.; Andersen P.S.; Olafsson A.S.; Brandt J.; Dalgaard T.,2015,"Policy, Institutions, Governmental",Several,Agriculture as supplier of ES,fully implemented,Local,Europe
Does Crop Diversification Pay Off? An Empirical Study in Home Gardens of the Iberian Peninsula,Reyes-GarcÕa V.; Calvet-Mir L.; Vila S.; Aceituno-Mata L.; Garnatje T.; Lastra J.J.; Parada M.; Rigat M.; Valls J.; Pardo-De-Santayana M.,2013,"Assessment, Cultural Services",Regulating,Agriculture as supplier of ES,slightly implemented,Regional,Europe
Does extensification lead to enhanced provision of ecosystems services from soils in UK agriculture?,Horrocks C.A.; Dungait J.A.J.; Cardenas L.M.; Heal K.V.,2014,Carbon and Nitrogen compounds,Regulating,Agriculture causes negative effects,fully implemented,Regional,Europe
Does logging and forest conversion to oil palm agriculture alter functional diversity in a biodiversity hotspot?,Edwards F.A.; Edwards D.P.; Larsen T.H.; Hsu W.W.; Benedick S.; Chung A.; Vun Khen C.; Wilcove D.S.; Hamer K.C.,2014,"Biodiversity, Pollination, Pest Control, Conservation",Regulating,Several,not implemented,Local,Asia
Does tallgrass prairie restoration enhance the invasion resistance of post-agricultural lands?,Foster B.L.; Houseman G.R.; Hall D.R.; Hinman S.E.,2015,"Biodiversity, Pollination, Pest Control, Conservation",Regulating,Agriculture as supplier of ES,not implemented,Regional,North America
Early reproductive benefits of mass-flowering crops to the solitary bee Osmia rufa outbalance post-flowering disadvantages,Jauker F.; Peter F.; Wolters V.; Diek_tter T.,2012,"Biodiversity, Pollination, Pest Control, Conservation",Regulating,Agriculture as supplier of ES,not implemented,Local,Europe
Earthworm ecosystem service and dis-service in an N-enriched agroecosystem: Increase of plant production leads to no effects onyield-scaled N2O emissions,Wu D.; Liu M.; Song X.; Jiao J.; Li H.; Hu F.,2015,Carbon and Nitrogen compounds,Several,Agriculture as user of ES,fully implemented,Local,Asia
Earthworms and litter management contributions to ecosystem services in a tropical agroforestry system,Fonte S.J.; Six J.,2010,Carbon and Nitrogen compounds,Several,Agriculture as supplier of ES,slightly implemented,Regional,Latin America
"Ecohydrological systemic solutions for reduction of siltation, eutophication and dioxin-induced toxicity. the pilot study of the asella biofarm park lake, Ethiopia",Zalewski M.; Urbaniak M.; Negussie Y.Z.,2010,Water,Provisioning,Agriculture as user of ES,not implemented,Local,Sub-Saharan Africa
Ecological and economic dynamics of the Shunde agricultural system under China's small city development strategy,Lu H.; Campbell D.E.,2009,"Policy, Institutions, Governmental",Provisioning,Agriculture as user of ES,fully implemented,Local,Asia
Ecological and economic services provided by birds on Jamaican Blue Mountain coffee farms,Kellermann J.L.; Johnson M.D.; Stercho A.M.; Hackett S.C.,2008,"Biodiversity, Pollination, Pest Control, Conservation",Regulating,Agriculture as user of ES,fully implemented,Local,Latin America
"Ecological and social drivers of coffee pollination in Santander, Colombia",Bravo-Monroy L.; Tzanopoulos J.; Potts S.G.,2015,"Biodiversity, Pollination, Pest Control, Conservation",Regulating,Several,fully implemented,Local,Latin America
Ecological complexity and pest control in organic coffee production: Uncovering an autonomous ecosystem service,Vandermeer J.; Perfecto I.; Philpott S.,2010,"Biodiversity, Pollination, Pest Control, Conservation",Regulating,Several,not implemented,Local,Latin America
Ecological engineering for traditional Chinese agriculture-A case study of Beitang,Gao J.; Wang R.; Huang J.,2015,"Policy, Institutions, Governmental",Several,Several,fully implemented,Local,Asia
Ecological impacts of early 21st century agricultural change in Europe - A review,Stoate C.; Bàldi A.; Beja P.; Boatman N.D.; Herzon I.; van Doorn A.; de Snoo G.R.; Rakosy L.; Ramwell C.,2009,"Policy, Institutions, Governmental",Cultural,Agriculture causes negative effects,slightly implemented,Regional,Europe
Ecological production functions for biological control services in agricultural landscapes,Jonsson M.; Bommarco R.; Ekbom B.; Smith H.G.; Bengtsson J.; Caballero-Lopez B.; Winqvist C.; Olsson O.,2014,"Biodiversity, Pollination, Pest Control, Conservation",Regulating,Agriculture as user of ES,fully implemented,Regional,Europe
Ecological restoration on farmland can drive beneficial functional responses in plant and invertebrate communities,Pywell R.F.; Meek W.R.; Loxton R.G.; Nowakowski M.; Carvell C.; Woodcock B.A.,2011,"Biodiversity, Pollination, Pest Control, Conservation",Regulating,Agriculture as supplier of ES,fully implemented,Local,Europe
"Ecological Restoration. Approaches and Impacts on Vegetation, Soils and Society.",Aradottir A.L.; Hagen D.,2013,Soil,Several,Agriculture as user of ES,fully implemented,Global,
Ecology of the entomopathogenic fungi Beauveria bassiana and Metarhizium anisopliae in temperate agroecosystems: Potential for conservation biological control,Meyling N.V.; Eilenberg J.,2007,"Biodiversity, Pollination, Pest Control, Conservation",Regulating,Several,not implemented,Global,
"Economic trade-offs between carbon sequestration, timber production, and crop pollination in tropical forested landscapes",Olschewski R.; Klein A.-M.; Tscharntke T.,2010,Carbon and Nitrogen compounds,Several,Agriculture as user of ES,slightly implemented,Regional,Latin America
Economic valuation of the vulnerability of world agriculture confronted with pollinator decline,Gallai N.; Salles J.-M.; Settele J.; Vaissire B.E.,2009,"Biodiversity, Pollination, Pest Control, Conservation",Regulating,Agriculture as user of ES,fully implemented,Global,
Ecosystem approach for natural hazard mitigation of volcanic tephra in Iceland: building resilience and sustainability,gÏstsdÑttir A.M.,2015,"Policy, Institutions, Governmental",Regulating,Several,not implemented,Regional,Europe
Ecosystem service bundles for analyzing tradeoffs in diverse landscapes,Raudsepp-Hearne C.; Peterson G.D.; Bennett E.M.,2010,"Assessment, Cultural services",Several,Several,fully implemented,Local,North America
Ecosystem Service Delivery in Wales: Evaluating Farmers' Engagement and Willingness to Participate,Wynne-Jones S.,2013,"Policy, Institutions, Governmental",Several,Agriculture as supplier of ES,fully implemented,Local,Europe
Ecosystem service state and trends at the regional to national level: A rapid assessment,Helfenstein J.; Kienast F.,2014,"Assessment, Cultural Services",Several,Several,fully implemented,Regional,Europe
Ecosystem service trade-offs and land use among smallholder farmers in Eastern Paraguay,Grossman J.J.,2015,"Assessment, Cultural Services",Several,Several,fully implemented,Regional,Latin America
"Ecosystem service trade-offs, perceived drivers, and sustainability in contrasting agroecosystems in central Mexico",Gonzàlez-Esquivel C.E.; Gavito M.E.; Astier M.; Cadena-Salgado M.; del-Val E.; Villamil-Echeverri L.; MerlÕn-Uribe Y.; Balvanera P.,2015,Other articles,Several,Several,fully implemented,Local,Latin America
"Ecosystem service tradeoff between traditional and modern agriculture: A case study in Congjiang County, Guizhou Province, China",Zhang D.; Min Q.; Liu M.; Cheng S.,2012,"Policy, Institutions, Governmental",Several,Several,fully implemented,Local,Asia
Ecosystem Service Value and Agricultural Conversion in the Amazon: Implications for Policy Intervention,Mann M.L.; Kaufmann R.K.; Bauer D.M.; Gopal S.; Baldwin J.G.; Del Carmen Vera-Diaz M.,2012,"Policy, Institutions, Governmental",Several,Agriculture as supplier of ES,fully implemented,Regional,Latin America
Ecosystem services along a management gradient in Michigan (USA) cropping systems,Syswerda S.P.; Robertson G.P.,2014,Carbon and Nitrogen compounds,Several,Agriculture as supplier of ES,slightly implemented,Regional,North America
Ecosystem services and agricultural land-use practices: A case study of the Chittagong Hill Tracts of Bangladesh,Rasul G.,2009,"Policy, Institutions, Governmental",Several,Agriculture as supplier of ES,fully implemented,Local,Asia
Ecosystem services and agriculture: Tradeoffs and synergies,Power A.G.,2010,Carbon and Nitrogen compounds,Provisioning,Several,fully implemented,Global,
Ecosystem services and dis-services to agriculture,Zhang W.; Ricketts T.H.; Kremen C.; Carney K.; Swinton S.M.,2007,"Policy, Institutions, Governmental",Several,Several,fully implemented,Global,
Ecosystem services and economic development in Austrian agricultural landscapes - The impact of policy and climate change scenarios on trade-offs and synergies,Kirchner M.; Schmidt J.; Kindermann G.; Kulmer V.; Mitter H.; Prettenthaler F.; RÙdisser J.; Schauppenlehner T.; Sch_nhart M.; Strauss F.; Tappeiner U.; Tasser E.; Schmid E.,2015,"Policy, Institutions, Governmental",Several,Several,fully implemented,Regional,Europe
Ecosystem services and Indiana agriculture: Farmers and conservationists perceptions,Logsdon R.A.; Kalcic M.M.; Trybula E.M.; Chaubey I.; Frankenberger J.R.,2015,"Biodiversity, Pollination, Pest Control, Conservation",Several,Several,fully implemented,Regional,North America
Ecosystem services and land use zonation in the Hungarian Tisza deep floodplains,Derts Z.; Koncsos L.,2012,"Policy, Institutions, Governmental",Several,Several,fully implemented,Local,Europe
Ecosystem services and the rural environment: Reforming European agricultural law,Jack B.,2012,"Policy, Institutions, Governmental",Several,Several,fully implemented,Regional,Europe
Ecosystem services assessment tool for agroforestry (ESAT-A): An approach to assess selected ecosystem services provided by alley cropping systems,Tsonkova P.; Quinkenstein A.; B_hm C.; Freese D.; Schaller E.,2014,"Assessment, Cultural Services",Regulating,Agriculture as supplier of ES,fully implemented,Regional,Europe
Ecosystem services from agriculture: Steps for expanding markets,Ribaudo M.; Greene C.; Hansen L.; Hellerstein D.,2010,"Policy, Institutions, Governmental",Several,Several,fully implemented,Regional,North America
Ecosystem services from woody vegetation on agricultural lands in Sudano-Sahelian West Africa,Sinare H.; Gordon L.J.,2015,Other articles,Several,Agriculture as supplier of ES,fully implemented,Regional,Sub-Saharan Africa
Ecosystem services in agricultural landscapes: A spatially explicit approach to support sustainable soil management,Forouzangohar M.; Crossman N.D.; Macewan R.J.; Wallace D.D.; Bennett L.T.,2014,Carbon and Nitrogen compounds,Several,Agriculture causes negative effects,fully implemented,Regional,Australia and New Zealand
Ecosystem services in agriculture: Determining suitability for provision by collective management,Stallman H.R.,2011,"Policy, Institutions, Governmental",Several,Several,fully implemented,Global,
"Ecosystem services in biologically diversified versus conventional farming systems: Benefits, externalities, and trade-offs",Kremen C.; Miles A.,2012,"Biodiversity, Pollination, Pest Control, Conservation",Several,Several,fully implemented,,
Ecosystem services in human-dominated landscapes: Insectivory in agroforestry systems,Poch T.J.; Simonetti J.A.,2013,"Biodiversity, Pollination, Pest Control, Conservation",Regulating,Agriculture as user of ES,slightly implemented,Global,
Ecosystem services in new Zealand agro-ecosystems: A literature review,Van Den Belt M.; Blake D.,2014,"Biodiversity, Pollination, Pest Control, Conservation",Several,Several,fully implemented,,
Ecosystem services in peri-urban landscapes: The effects of agricultural landscape change on ecosystem services in Taiwan's western coastal plain,Lee Y.-C.; Ahern J.; Yeh C.-T.,2015,"Policy, Institutions, Governmental",Several,Several,fully implemented,Local,Asia
Ecosystem services in the face of invasion: The persistence of native and nonnative spiders in an agricultural landscape,Hogg B.N.; Daane K.M.,2011,"Biodiversity, Pollination, Pest Control, Conservation",Regulating,Agriculture as supplier of ES,fully implemented,Regional,North America
"Ecosystem services of native trees: Experiences from two traditional agroforestry systems in Karnataka, Southern India",Dhanya B.; Sathish B.N.; Viswanath S.; Purushothaman S.,2014,"Biodiversity, Pollination, Pest Control, Conservation",Several,Agriculture as user of ES,fully implemented,Regional,Asia
Ecosystem services of regulation and support in Amazonian pioneer fronts: Searching for landscape drivers,Grimaldi M.; Oszwald J.; Dol_dec S.; Hurtado M.P.; de Souza Miranda I.; Arnauld de Sartre X.; Assis W.S.; CastaÐeda E.; Desjardins T.; Dubs F.; Guevara E.; Gond V.; Lima T.T.S.; Marichal R.; Michelotti F.; Mitja D.; Noronha N.C.; Delgado Oliveira M.N.; Ramirez B.; Rodriguez G.; Sarrazin M.; Silva Jr. M.L.; Costa L.G.S.; Souza S.L.; Veiga I.; Velasquez E.; Lavelle P.,2014,Carbon and Nitrogen compounds,Regulating,Several,fully implemented,Regional,Latin America
"Ecosystem services of traditional irrigation systems in northern New Mexico, USA",Fleming W.M.; Rivera J.A.; Miller A.; Piccarello M.,2014,Water,Provisioning,Agriculture as supplier of ES,,Regional,Latin America
"Ecosystem services provided by agroecosystems: A qualitative and quantitative assessment of this relationship in the Pampa Region, Argentina",Rositano F.; Ferraro D.O.,2014,"Assessment, Cultural Services",Several,Agriculture as supplier of ES,fully implemented,Regional,Latin America
Ecosystem services provided by bats,Kunz T.H.; de Torrez E.B.; Bauer D.; Lobova T.; Fleming T.H.,2011,"Biodiversity, Pollination, Pest Control, Conservation",Several,Agriculture as user of ES,fully implemented,,
Ecosystem services research in contrasting socio-ecological contexts of Argentina: Critical assessment and future directions,Mastrangelo M.E.; Weyland F.; Herrera L.P.; Villarino S.H.; Barral M.P.; Auer A.D.,2015,"Policy, Institutions, Governmental",Several,Agriculture causes negative effects,fully implemented,Regional,Latin America
Ecosystem services-biodiversity relationships depend on land use type in floodplain agroecosystems,Felipe-Lucia M.R.; ComÕn F.A.,2015,"Policy, Institutions, Governmental",Several,Agriculture as supplier of ES,fully implemented,Local,Europe
"Ecosystem services, agriculture, and rural poverty in the Eastern Brazilian Amazon: Interrelationships and policy prescriptions",B_rner J.; Mendoza A.; Vosti S.A.,2007,"Policy, Institutions, Governmental",Several,Agriculture as supplier of ES,fully implemented,Local,Latin America
"Ecosystem-based adaptation for smallholder farmers: Definitions, opportunities and constraints",Vignola R.; Harvey C.A.; Bautista-Solis P.; Avelino J.; Rapidel B.; Donatti C.; Martinez R.,2015,Climate,Provisioning,Agriculture as user of ES,slightly implemented,Global,Latin America
Ecosystem-Based Agriculture Combining Production and Conservation-A Viable Way to Feed the World in the Long Term?,Bj_rklund J.; Araya H.; Edwards S.; Goncalves A.; H__k K.; Lundberg J.; Medina C.,2012,"Biodiversity, Pollination, Pest Control, Conservation",Several,Several,fully implemented,Global,
Edge effects on flower-visiting insects in grapefruit plantations bordering premontane subtropical forest,Chacoff N.P.; Aizen M.A.,2006,"Biodiversity, Pollination, Pest Control, Conservation",Regulating,Several,not implemented,Local,Latin America
Editorial: Introduction to themed section-Supporting ecosystem services with conservation agricultural approaches,Franzluebbers A.J.,2013,"Biodiversity, Pollination, Pest Control, Conservation",Several,Several,fully implemented,Regional,
Effects of agricultural management practices on earthworm populations and crop yield: Validation and application of a mechanistic modelling approach,Johnston A.S.A.; Sibly R.M.; Hodson M.E.; Alvarez T.; Thorbek P.,2015,"Biodiversity, Pollination, Pest Control, Conservation",Regulating,Several,slightly implemented,,
"Effects of farming intensity, crop rotation and landscape heterogeneity on field bean pollination",Andersson G.K.S.; Ekroos J.; Stjernman M.; Rundl_f M.; Smith H.G.,2014,"Biodiversity, Pollination, Pest Control, Conservation",Regulating,Agriculture as supplier of ES,slightly implemented,Local,Europe
Effects of land use and insecticides on natural enemies of aphids in cotton: First evidence from smallholder agriculture in the North China Plain,Zhou K.; Huang J.; Deng X.; van der Werf W.; Zhang W.; Lu Y.; Wu K.; Wu F.,2014,"Biodiversity, Pollination, Pest Control, Conservation",Regulating,Several,slightly implemented,Local,Asia
Effects of land use changes on the ecosystem service values of a reclamation farm in northeast China,Hao F.; Lai X.; Ouyang W.; Xu Y.; Wei X.; Song K.,2012,"Policy, Institutions, Governmental",Several,Several,fully implemented,Local,Asia
Effects of Landscape Segregation on Livelihood Vulnerability: Moving From Extensive Shifting Cultivation to Rotational Agriculture and Natural Forests in Northern Laos,Castella J.-C.; Lestrelin G.; Hett C.; Bourgoin J.; Fitriana Y.R.; Heinimann A.; Pfund J.-L.,2013,"Policy, Institutions, Governmental",Several,Several,fully implemented,Local,Asia
Effects of management and landscape composition on the diversity and structure of tree species assemblages in coffee agroforests,H_ger A.; Fernàndez Otàrola M.; Stuhlmacher M.F.; AcuÐa Castillo R.; Contreras Arias A.,2015,"Biodiversity, Pollination, Pest Control, Conservation",Regulating,Agriculture as supplier of ES,slightly implemented,Regional,Latin America
Effects of management intensity and orchard features on bird communities in winter,Myczko _.; Rosin Z.M.; SkÑrka P.; Wylega_a P.; Tobolka M.; Fliszkiewicz M.; Mizera T.; Tryjanowski P.,2013,"Biodiversity, Pollination, Pest Control, Conservation",Cultural,Agriculture as supplier of ES,not implemented,Local,Europe
Effects of organic farming on biodiversity and ecosystem services: Taking landscape complexity into account,Winqvist C.; Ahnstr_m J.; Bengtsson J.,2012,"Biodiversity, Pollination, Pest Control, Conservation",Regulating,Several,fully implemented,Local,
"Effects of organic farming, fencing and vegetation origin on spiders and beetles within shelterbelts on dairy farms",Fukuda Y.; Moller H.; Burns B.,2011,"Biodiversity, Pollination, Pest Control, Conservation",Regulating,Agriculture as supplier of ES,slightly implemented,Regional,Australia and New Zealand
Effects of Pond Draining on Biodiversity and Water Quality of Farm Ponds,Usio N.; Imada M.; Nakagawa M.; Akasaka M.; Takamura N.,2013,"Biodiversity, Pollination, Pest Control, Conservation",Several,Agriculture causes negative effects,not implemented,Regional,Asia
Effects of seasonality and farm proximity to forest on Hymenoptera in TarrazÏ coffee farms,Banks J.E.; Hannon L.M.; Dietsch T.V.; Chandler M.,2014,"Biodiversity, Pollination, Pest Control, Conservation",Regulating,Agriculture as user of ES,not implemented,Local,Latin America
Effects of shade and bird exclusion on arthropods and leaf damage on coffee farms in Jamaica's Blue Mountains,Johnson M.D.; Levy N.J.; Kellermann J.L.; Robinson D.E.,2009,"Biodiversity, Pollination, Pest Control, Conservation",Regulating,Agriculture as user of ES,slightly implemented,Local,Latin America
Effects of synthetic fertilizer on coffee yields and ecosystem services: Parasitoids and soil glomalin in a costa rican coffee agroecosystem,Banks J.E.; Cline E.; Castro S.; Urena N.; Nichols K.; Hannon L.; Singer R.; Chandler M.,2011,Carbon and Nitrogen compounds,Several,Several,slightly implemented,Local,Latin America
Encouraging collaboration for the provision of ecosystem services at a landscape scale-Rethinking agri-environmental payments,Prager K.; Reed M.; Scott A.,2012,"Policy, Institutions, Governmental",Several,Agriculture as supplier of ES,fully implemented,Local,Europe
Energy Efficiency in Agrarian Systems From an Agroecological Perspective,Guzmàn G.I.; Gonzàlez de Molina M.,2015,Other articles,Provisioning,Agriculture as user of ES,slightly implemented,Local,Europe
Enhanced biodiversity and pollination in UK agroforestry systems,Varah A.; Jones H.; Smith J.; Potts S.G.,2013,"Biodiversity, Pollination, Pest Control, Conservation",Regulating,Agriculture as supplier of ES,slightly implemented,Local,Europe
Enhanced pest control in cabbage crops near forest in the Netherlands,Bianchi F.J.J.A.; Goedhart P.W.; Baveco J.M.,2008,"Biodiversity, Pollination, Pest Control, Conservation",Regulating,Agriculture as user of ES,fully implemented,Regional,Europe
Enhancement of buffer strips can improve provision of multiple ecosystem services,Blake R.J.; Westbury D.B.; Woodcock B.A.; Sutton P.; Potts S.G.,2012,"Biodiversity, Pollination, Pest Control, Conservation",Several,Several,slightly implemented,Local,Europe
Enhancing ecosystem services in sustainable agriculture: Biofertilization and biofortification of chickpea (Cicer arietinum L.) by arbuscular mycorrhizal fungi,Pellegrino E.; Bedini S.,2014,Other articles,Several,Agriculture as user of ES,fully implemented,Regional,Europe
Environmental Duty of Care: From Ethical Principle Towards a Code of Practice for the Grazing Industry in Queensland (Australia),Greiner R.,2014,"Assessment, Cultural Services",Cultural,Agriculture causes negative effects,not implemented,Regional,Australia and New Zealand
Environmental factors driving the effectiveness of European agri-environmental measures in mitigating pollinator loss - a meta-analysis,Scheper J.; Holzschuh A.; Kuussaari M.; Potts S.G.; Rundl_f M.; Smith H.G.; Kleijn D.,2013,"Biodiversity, Pollination, Pest Control, Conservation",Regulating,Agriculture as supplier of ES,fully implemented,Local,Europe
"Environmental Impact Assessment, ecosystems services and the case of energy crops in England",Coleby A.M.; van der Horst D.; Hubacek K.; Goodier C.; Burgess P.J.; Graves A.; Lord R.; Howard D.,2012,"Assessment, Cultural Services",Several,Agriculture as supplier of ES,fully implemented,Regional,Europe
Environmental law and agroecology. Transdisciplinary approach to public ecosystem services as a new challenge for environmental legal doctrine,Monteduro M.,2013,"Policy, Institutions, Governmental",Several,Several,slightly implemented,,Europe
Environmental services coupled to food products and brands: Food companies interests and on-farm accounting,Kempa D.,2013,"Policy, Institutions, Governmental",Several,Several,slightly implemented,Regional,Europe
Environmental sustainability of Alpine livestock farms,Battaglini L.; Bovolenta S.; Gusmeroli F.; Salvador S.; Sturaro E.,2014,Carbon and Nitrogen compounds,Several,Several,fully implemented,Regional,Europe
Environmental technology in the sustainable use of agricultural ecosystem services: The relevance of farmers' mental models,R_nk_ M.; Kamppinen M.; Tolvanen H.; Huitu H.; Thessler S.; Vihervaara P.; Aarras N.,2014,"Assessment, Cultural Services",Several,Several,not implemented,Local,Europe
Envisioning the future of transhumant pastoralism through participatory scenario planning: A case study in Spain,Oteros-Rozas E.; Martn-Lpez B.; Lpez C.A.; Palomo I.; Gonzlez J.A.,2013,"Policy, Institutions, Governmental",Several,Agriculture as supplier of ES,fully implemented,Local,Europe
ESLab application to a boreal watershed in southern Finland: preparing for a virtual research environment of ecosystem services,Holmberg M.; Akuj_rvi A.; Anttila S.; Arvola L.; Bergstr_m I.; B_ttcher K.; Feng X.; Forsius M.; Huttunen I.; Huttunen M.; Laine Y.; Lehtonen H.; Liski J.; Mononen L.; Rankinen K.; Repo A.; Piirainen V.; Vanhala P.; Vihervaara P.,2015,Carbon and Nitrogen compounds,Several,Several,fully implemented,Regional,Europe
Essential multiple functions of farms in rural communities and landscapes,Milestad R.; Ahnstr_m J.; Bjrklund J.,2011,"Policy, Institutions, Governmental",Several,Several,fully implemented,Local,Europe
Estimating compensation payments for on-farm conservation of agricultural biodiversity in developing countries,Krishna V.V.; Drucker A.G.; Pascual U.; Raghu P.T.; King E.D.I.O.,2013,"Policy, Institutions, Governmental",Regulating,Agriculture as supplier of ES,slightly implemented,Local,Asia
Estimating the value of agricultural ecosystem services: A case study of New Zealand pastoral farming,Baskaran R.; Cullen R.; Takatsuka Y.,2009,"Assessment, Cultural Services",Several,Several,fully implemented,Regional,Australia and New Zealand
"European agricultural landscapes, common agricultural policy and ecosystem services: A review",Van Zanten B.T.; Verburg P.H.; Espinosa M.; Gomez-Y-Paloma S.; Galimberti G.; Kantelhardt J.; Kapfer M.; Lefebvre M.; Manrique R.; Piorr A.; Raggi M.; Schaller L.; Targetti S.; Zasada I.; Viaggi D.,2014,"Policy, Institutions, Governmental",Several,Agriculture as supplier of ES,fully implemented,Regional,Europe
European Policy Review: Functional agrobiodiversity supporting sustainable agriculture,Delbaere B.; Mikos V.; Pulleman M.,2014,"Policy, Institutions, Governmental",Several,Several,fully implemented,Regional,Europe
Evaluating farmers' likely participation in a payment programme for water quality protection in the UK uplands,Beharry-Borg N.; Smart J.C.R.; Termansen M.; Hubacek K.,2013,Water,Provisioning,Agriculture causes negative effects,fully implemented,Local,Europe
Evaluating the functionality of agricultural systems: Social preferences for multifunctional peri-urban agriculture. The ñHuerta de Valenciaî as case study,Marques-Perez I.; Segura B.; Maroto C.,2014,"Assessment, Cultural Services",Several,Several,fully implemented,Local,Europe
Evaluating the relative impact of climate and economic changes on forest and agricultural ecosystem services in mountain regions,Briner S.; Elkin C.; Huber R.,2013,Climate,Provisioning,Agriculture as user of ES,fully implemented,Local,Europe
Evaluation of agricultural ecosystem services in fallowing land based on farmers' participation and model simulation,Liu Y.L.; Chang K.-t.; Stoorvogel J.; Verburg P.; Sun C.H.,2012,"Policy, Institutions, Governmental",Regulating,Agriculture as supplier of ES,fully implemented,Local,Asia
Evidence of sustainable intensification among British farms,Firbank L.G.; Elliott J.; Drake B.; Cao Y.; Gooday R.,2013,Carbon and Nitrogen compounds,Several,Agriculture as supplier of ES,fully implemented,Regional,Europe
"Examining links between soil management, soil health, and public benefits in agricultural landscapes: An Australian perspective",Bennett L.T.; Mele P.M.; Annett S.; Kasel S.,2010,Soil,Provisioning,Agriculture as supplier of ES,fully implemented,Global,
Exclusion of agricultural lands in spatial conservation prioritization strategies: consequences for biodiversity and ecosystem service representation,Duràn A.P.; Duffy J.P.; Gaston K.J.,2014,"Biodiversity, Pollination, Pest Control, Conservation",Several,Several,fully implemented,Regional,Latin America
Existing markets for ecosystem services in the Panama canal watershed,Wallander S.; Lauterbach S.; Anderson K.; Chou F.; Grossman J.; Schloegel C.,2007,Carbon and Nitrogen compounds,Regulating,Agriculture as supplier of ES,fully implemented,Regional,Latin America
Exotic pest insects: Another perspective on coffee and conservation,Kaiser C.N.; Hansen D.M.; MÙller C.B.,2008,"Biodiversity, Pollination, Pest Control, Conservation",Regulating,Agriculture causes negative effects,not implemented,Local,Sub-Saharan Africa
Expansion and intensification of row crop agriculture in the Pampas and Espinal of Argentina can reduce ecosystem service provision by changing avian density,Gavier-Pizarro G.I.; Calamari N.C.; Thompson J.J.; Canavelli S.B.; Solari L.M.; Decarre J.; Goijman A.P.; Suarez R.P.; Bernardos J.N.; Zaccagnini M.E.,2012,"Biodiversity, Pollination, Pest Control, Conservation",Regulating,Agriculture causes negative effects,not implemented,Regional,Latin America
Experiences of water transfer from the agricultural to the non-agricultural sector in Taiwan,Huang C.C.; Tsai M.H.; Lin W.T.; Ho Y.F.; Tan C.H.; Sung Y.L.,2007,Water,Provisioning,Agriculture as supplier of ES,not implemented,Regional,Asia
Experimental evidence that the effectiveness of conservation biological control depends on landscape complexity,Jonsson M.; Straub C.S.; Didham R.K.; Buckley H.L.; Case B.S.; Hale R.J.; Gratton C.; Wratten S.D.,2015,"Biodiversity, Pollination, Pest Control, Conservation",Regulating,Several,not implemented,Local,Australia and New Zealand
Experimental evidence that wildflower strips increase pollinator visits to crops,Feltham H.; Park K.; Minderman J.; Goulson D.,2015,"Biodiversity, Pollination, Pest Control, Conservation",Regulating,Agriculture as supplier of ES,slightly implemented,Local,Europe
Exploring the knowledge landscape of ecosystem services assessments in Mediterranean agroecosystems: Insights for future research,Nieto-Romero M.; Oteros-Rozas E.; Gonzàlez J.A.; MartÕn-LÑpez B.,2014,"Policy, Institutions, Governmental",Several,Agriculture as supplier of ES,fully implemented,Regional,Europe
"Exploring the production capacity of rooftop gardens (RTGs) in urban agriculture: the potential impact on food and nutrition security, biodiversity and other ecosystem services in the city of Bologna",Orsini F.; Gasperi D.; Marchetti L.; Piovene C.; Draghetti S.; Ramazzotti S.; Bazzocchi G.; Gianquinto G.,2014,"Biodiversity, Pollination, Pest Control, Conservation",Several,Several,not implemented,Local,Europe
Extending conservation to farmlands in Zambia: Prescribed practices and reality,Mfune O.,2014,"Biodiversity, Pollination, Pest Control, Conservation",Regulating,Agriculture as supplier of ES,not implemented,Regional,Sub-Saharan Africa
"Farm households' preferences for collective and individual actions to improve water-related ecosystem services: The Lake Naivasha basin, Kenya",Mulatu D.W.; van der Veen A.; van Oel P.R.,2014,Water,Regulating,Agriculture causes negative effects,fully implemented,Regional,Sub-Saharan Africa
Farm ponds make a contribution to the biodiversity of aquatic insects in a French agricultural landscape,Ruggiero A.; C_r_ghino R.; Figuerola J.; Marty P.; Ang_libert S.,2008,"Biodiversity, Pollination, Pest Control, Conservation",Regulating,Agriculture as user of ES,not implemented,Regional,Europe
"Farmer participation in the equitable payments for watershed services in Morogoro, Tanzania",Kwayu E.J.; Sallu S.M.; Paavola J.,2014,Water,Regulating,Agriculture causes negative effects,slightly implemented,Regional,Sub-Saharan Africa
"Farmer typology, future scenarios and the implications for ecosystem service provision: A case study from south-eastern Spain",Nainggolan D.; Termansen M.; Reed M.S.; Cebollero E.D.; Hubacek K.,2013,"Assessment, Cultural Services",Several,Agriculture as supplier of ES,slightly implemented,Local,Europe
Farmers in Cªte dÍIvoire value integrating tree diversity in cocoa for the provision of ecosystem services,Smith Dumont E.; Gnahoua G.M.; Ohouo L.; Sinclair F.L.; Vaast P.,2014,"Policy, Institutions, Governmental",Several,Agriculture as user of ES,fully implemented,Regional,Sub-Saharan Africa
Farmers in NE Viet Nam rank values of ecosystems from seven land uses,Simelton E.; Viet Dam B.,2014,"Policy, Institutions, Governmental",Several,Agriculture as supplier of ES,fully implemented,Local,Asia
"Farmers value on-farm ecosystem services as important, but what are the impediments to participation in PES schemes?",Page G.; Bellotti B.,2015,Other articles,Several,Several,fully implemented,Local,Australia and New Zealand
"Farmers' (local and colonists) perceptions of environmental changes in the forest frontier of the upper Amazon, Peru",Lindell L.; Henningsson M.; Marquardt K.; str_m M.E.,2014,Climate,Regulating,Agriculture causes negative effects,slightly implemented,Local,Latin America
Farmers' Perspectives on Vital Soil-related Ecosystem Services in Intensive Swidden Farming Systems in the Peruvian Amazon,Marquardt K.; Milestad R.; Porro R.,2013,Soil,Several,Agriculture as supplier of ES,fully implemented,Local,Latin America
Farmers' willingness to provide ecosystem services and effects of their spatial distribution,Broch S.W.; Strange N.; Jacobsen J.B.; Wilson K.A.,2013,"Biodiversity, Pollination, Pest Control, Conservation",Several,Several,fully implemented,Regional,Europe
Farming for ecosystem services: An ecological approach to production agriculture,Robertson G.P.; Gross K.L.; Hamilton S.K.; Landis D.A.; Schmidt T.M.; Snapp S.S.; Swinton S.M.,2014,Carbon and Nitrogen compounds,Provisioning,Agriculture as supplier of ES,fully implemented,Regional,North America
Farming with native bees (Apis mellifera subsp. capensis Esch.) has varied effects on nectar-feeding bird communities in South African fynbos vegetation,Geerts S.; Pauw A.,2011,"Biodiversity, Pollination, Pest Control, Conservation",Regulating,Agriculture causes negative effects,not implemented,Local,Sub-Saharan Africa
Farmland conversion to non-agricultural uses in the US and Canada: Current impacts and concerns for the future,Francis C.A.; Hansen T.E.; Fox A.A.; Hesje P.J.; Nelson H.E.; Lawseth A.E.; English A.,2012,Other articles,Several,Agriculture as supplier of ES,not implemented,Regional,North America
Flow and stability of natural pest control services depend on complexity and crop rotation at the landscape scale,Rusch A.; Bommarco R.; Jonsson M.; Smith H.G.; Ekbom B.,2013,"Biodiversity, Pollination, Pest Control, Conservation",Regulating,Several,fully implemented,Local,Europe
Food security in a perfect storm: Using the ecosystem services framework to increase understanding,Poppy G.M.; Chiotha S.; Eigenbrod F.; Harvey C.A.; Honzàk M.; Hudson M.D.; Jarvis A.; Madise N.J.; Schreckenberg K.; Shackleton C.M.; Villa F.; Dawson T.P.,2014,"Assessment, Cultural Services",Several,Several,fully implemented,Local,Sub-Saharan Africa
Food web-based simulation for agroecology,Tixier P.; Duyck P.-F.; Cªte F.-X.; Caron-Lormier G.; Mal_zieux E.,2013,"Biodiversity, Pollination, Pest Control, Conservation",Regulating,Agriculture as user of ES,slightly implemented,Global,Europe
Food-carbon trade-offs between agriculture and reforestation land uses under alternate market-based policies,Paterson S.; Bryan B.A.,2012,"Policy, Institutions, Governmental",Regulating,Agriculture as supplier of ES,fully implemented,Local,Australia and New Zealand
Forecasting the influence of climate change on agroecosystem services: Potential impacts on honey yields in a small-island developing state,Delgado D.L.; P_rez M.E.; Galindo-Cardona A.; Giray T.; Restrepo C.,2012,Climate,Provisioning,Agriculture as user of ES,fully implemented,Local,Latin America
"Forest bolsters bird abundance, pest control and coffee yield",Karp D.S.; Mendenhall C.D.; SandÕ R.F.; Chaumont N.; Ehrlich P.R.; Hadly E.A.; Daily G.C.,2013,"Biodiversity, Pollination, Pest Control, Conservation",Regulating,Agriculture as user of ES,fully implemented,Local,Latin America
Forest ecosystem services and biodiversity in contrasting Himalayan forest management systems,MÎren I.E.; Bhattarai K.R.; Chaudhary R.P.,2014,"Policy, Institutions, Governmental",Several,Agriculture as supplier of ES,fully implemented,Regional,Asia
Forest fragments modulate the provision of multiple ecosystem services,Mitchell M.G.E.; Bennett E.M.; Gonzalez A.,2014,"Biodiversity, Pollination, Pest Control, Conservation",Several,Agriculture as user of ES,fully implemented,Local,North America
"FORUM: Landscape-scale conservation: Collaborative agri-environment schemes could benefit both biodiversity and ecosystem services, but will farmers be willing to participate?",Mckenzie A.J.; Emery S.B.; Franks J.R.; Whittingham M.J.,2013,"Policy, Institutions, Governmental",Provisioning,Agriculture as supplier of ES,fully implemented,Local,Europe
"From april to august-wild bees pollinating crops through the growing season in Virginia, USA",Adamson N.L.; Roulston T.H.; Fell R.D.; Mullins D.E.,2012,"Biodiversity, Pollination, Pest Control, Conservation",Regulating,Agriculture as user of ES,fully implemented,Local,North America
From biophysical to social-ecological trade-offs: Integrating biodiversity conservation and agricultural production in the Argentine Dry Chaco,Mastrangelo M.E.; Laterra P.,2015,"Biodiversity, Pollination, Pest Control, Conservation",Several,Several,not implemented,Regional,Latin America
From integrated to system-wide pest management: Challenges for sustainable agriculture,Br_vault T.; Bouyer J.,2014,"Biodiversity, Pollination, Pest Control, Conservation",Regulating,Several,slightly implemented,Global,
From market to multifunctionality? Land stewardship in Australia,Cocklin C.; Dibden J.; Mautner N.,2006,"Policy, Institutions, Governmental",Several,Several,slightly implemented,Regional,Australia and New Zealand
Functional agrobiodiversity and agroecosystem services in sustainable wheat production. A review,Costanzo A.; Börberi P.,2014,"Biodiversity, Pollination, Pest Control, Conservation",Several,Several,fully implemented,Global,
Functional land management: A framework for managing soil-based ecosystem services for the sustainable intensification of agriculture,Schulte Rogier P. O.; Creamer Rachel E.; Donnellan Trevor; Farrelly Niall; Fealy Reamonn; OÍDonoghue Cathal; OÍhUallachain Daire,2014,Soil,Provisioning,Agriculture as supplier of ES,fully implemented,,Europe
Functional organization analysis for the design of sustainable engineering systems,Halbe J.; Adamowski J.; M. Bennett E.; Pahl-Wostl C.; Farahbakhsh K.,2014,"Assessment, Cultural Services",Several,Several,fully implemented,Local,North America
Functional richness and ecosystem services: Bird predation on arthropods in tropical agroecosystems,Philpott S.M.; Soong O.; Lowenstein J.H.; Luz Pulido A.; Lopez D.T.; Flynn D.F.B.; Declerck F.,2009,"Biodiversity, Pollination, Pest Control, Conservation",Regulating,Agriculture as supplier of ES,slightly implemented,Regional,Latin America
Global malnutrition overlaps with pollinator-dependent micronutrient production,Chaplin-Kramer R.; Dombeck E.; Gerber J.; Knuth K.A.; Mueller N.D.; Mueller M.; Ziv G.; Klein A.-M.,2014,"Biodiversity, Pollination, Pest Control, Conservation",Provisioning,Several,fully implemented,Global,
Governing agriculture-forest landscapes to achieve climate change mitigation,Agrawal A.; Wollenberg E.; Persha L.,2014,Climate,Regulating,Agriculture as supplier of ES,slightly implemented,Global,
"Habitat and time are more important predictors of weed seed predation than space on a diversified vegetable farm in Maine, USA",Birthisel S.K.; Gallandt E.R.; Jabbour R.; Drummond F.A.,2015,"Biodiversity, Pollination, Pest Control, Conservation",Regulating,Agriculture as user of ES,fully implemented,Local,North America
"Habitat conversion, extinction thresholds, and pollination services in agroecosystems",Keitt T.H.,2009,"Biodiversity, Pollination, Pest Control, Conservation",Regulating,Several,fully implemented,Regional,
Habitat structure influences below ground biocontrol services: A comparison between urban gardens and vacant lots,Yadav P.; Duckworth K.; Grewal P.S.,2012,"Biodiversity, Pollination, Pest Control, Conservation",regulating,agriculture as user of ES,slightly implemented,Local,North America
Harnessing biodiversity to improve vineyard sustainability,Barnes A.M.; Wratten S.D.; Sandhu H.S.,2009,"Biodiversity, Pollination, Pest Control, Conservation",Regulating,Several,fully implemented,Local,Australia and New Zealand
Hedgerow restoration promotes pollinator populations and exports native bees to adjacent fields,Morandin L.A.; Kremen C.,2013,"Biodiversity, Pollination, Pest Control, Conservation",Regulating,Agriculture as user of ES,slightly implemented,Local,North America
Hedgerows enhance beneficial insects on adjacent tomato fields in an intensive agricultural landscape,Morandin L.A.; Long R.F.; Kremen C.,2014,"Biodiversity, Pollination, Pest Control, Conservation",Regulating,Agriculture as user of ES,slightly implemented,Local,North America
Hedgerows surrounding organic apple orchards in north-west Spain: Potential to conserve beneficial insects,MiÐarro M.; Prida E.,2013,"Biodiversity, Pollination, Pest Control, Conservation",Regulating,Agriculture as user of ES,slightly implemented,Local,Europe
High-throughput monitoring of wild bee diversity and abundance via mitogenomics,Tang M.; Hardman C.J.; Ji Y.; Meng G.; Liu S.; Tan M.; Yang S.; Moss E.D.; Wang J.; Yang C.; Bruce C.; Nevard T.; Potts S.G.; Zhou X.; Yu D.W.,2015,"Biodiversity, Pollination, Pest Control, Conservation",Regulating,Agriculture causes negative effects,not implemented,Local,Europe
Historical trends of wetland areas in the agriculture and pasture interlaced zone: A case study of the Huangqihai Lake Basin in northern China,Chen M.; Liu J.,2015,"Policy, Institutions, Governmental",Several,Agriculture causes negative effects,slightly implemented,Local,Asia
"Hoverfly (Diptera: Syrphidae) community of a cultivated arable field and the adjacent hedgerow near Debrecen, Hungary",F_ldesi R.; Kovàcs-Hostyànszki A.,2014,"Biodiversity, Pollination, Pest Control, Conservation",Regulating,Agriculture as user of ES,not implemented,Local,Europe
"How Do Fruit Bat Seed Shadows Benefit Agroforestry? Insights from Local Perceptions in Kerala, India",Deshpande K.; Kelkar N.,2015,"Biodiversity, Pollination, Pest Control, Conservation",Several,Several,not implemented,Local,Asia
How does agricultural management modify ecosystem services in the argentine Pampas? The effects on soil C dynamics,Caride Constanza; PiÐeiro Gervasio; Paruelo Jos_ MarÕa,2012,Carbon and Nitrogen compounds,Regulating,Agriculture causes negative effects,slightly implemented,Regional,Latin America
How ecosystem services knowledge and values influence farmers' decision-making,Lamarque P.; Meyfroidt P.; Nettier B.; Lavorel S.,2014,Other articles,Several,Several,fully implemented,Local,Europe
How fundamental plant functional trait relationships scale-up to trade-offs and synergies in ecosystem services,Lavorel S.; Grigulis K.,2012,"Biodiversity, Pollination, Pest Control, Conservation",Several,Agriculture as supplier of ES,fully implemented,Regional,Europe
How good are tropical forest patches for ecosystem services provisioning?,Ferraz S.F.B.; Ferraz K.M.P.M.B.; Cassiano C.C.; Brancalion P.H.S.; da Luz D.T.A.; Azevedo T.N.; Tambosi L.R.; Metzger J.P.,2014,"Assessment, Cultural Services",Provisioning,Agriculture as supplier of ES,fully implemented,Regional,Latin America
How local intermediaries improve the effectiveness of public payment for ecosystem services programs: The role of networks and agri-environmental assistance,Schomers S.; Matzdorf B.; Meyer C.; Sattler C.,2015,"Policy, Institutions, Governmental",Several,Several,fully implemented,Regional,Europe
How much land-based greenhouse gas mitigation can be achieved without compromising food security and environmental goals?,Smith P.; Haberl H.; Popp A.; Erb K.-H.; Lauk C.; Harper R.; Tubiello F.N.; De Siqueira Pinto A.; Jafari M.; Sohi S.; Masera O.; B_ttcher H.; Berndes G.; Bustamante M.; Ahammad H.; Clark H.; Dong H.; Elsiddig E.A.; Mbow C.; Ravindranath N.H.; Rice C.W.; Robledo Abad C.; Romanovskaya A.; Sperling F.; Herrero M.; House J.I.; Rose S.,2013,Climate,Regulating,Agriculture as supplier of ES,fully implemented,Global,
How to achieve fairness in payments for ecosystem services? Insights from agrobiodiversity conservation auctions,Narloch U.; Pascual U.; Drucker A.G.,2013,"Policy, Institutions, Governmental",Regulating,Agriculture as supplier of ES,slightly implemented,Local,Latin America
How to build multifunctional agricultural landscapes in the U.S. Corn Belt: Add perennials and partnerships,Atwell R.C.; Schulte L.A.; Westphal L.M.,2010,"Policy, Institutions, Governmental",Several,Several,slightly implemented,Regional,North America
How to implement biodiversity-based agriculture to enhance ecosystem services: a review,Duru M.; Therond O.; Martin G.; Martin-Clouaire R.; Magne M.-A.; Justes E.; Journet E.-P.; Aubertot J.-N.; Savary S.; Bergez J.-E.; Sarthou J.P.,2015,"Biodiversity, Pollination, Pest Control, Conservation",Several,Several,fully implemented,Global,
Hybrid poplar yields in Qu_bec: Implications for a sustainable forest zoning management system,Fortier J.; Truax B.; Gagnon D.; Lambert F.,2012,"Biodiversity, Pollination, Pest Control, Conservation",Several,Several,slightly implemented,Regional,North America
"Hydrologic, riparian, and agroecosystem functions of traditional acequia irrigation systems",Fernald A.G.; Baker T.T.; Guldan S.J.,2007,Water,Several,Agriculture as supplier of ES,slightly implemented,Regional,North America
Hydroperiod and Traditional Farming Practices Drive Plant Community Composition on Unregulated Atlantic Floodplain Meadows,Maher C.; Sheehy Skeffington M.; Gormally M.,2015,"Biodiversity, Pollination, Pest Control, Conservation",Regulating,Agriculture as supplier of ES,not implemented,Regional,Europe
Identifying and prioritising services in European terrestrial and freshwater ecosystems,Harrison P.A.; Vandewalle M.; Sykes M.T.; Berry P.M.; Bugter R.; de Bello F.; Feld C.K.; Grandin U.; Harrington R.; Haslett J.R.; Jongman R.H.G.; Luck G.W.; da Silva P.M.; Moora M.; Settele J.; Sousa J.P.; Zobel M.,2010,Soil,Several,Agriculture as supplier of ES,fully implemented,Regional,Europe
Impact of chronic exposure to a pyrethroid pesticide on bumblebees and interactions with a trypanosome parasite,Baron G.L.; Raine N.E.; Brown M.J.F.,2014,"Biodiversity, Pollination, Pest Control, Conservation",Regulating,Agriculture causes negative effects,not implemented,Local,Europe
Impact of land use patterns and agricultural practices on water quality in the Calapooia River Basin of western Oregon,Mueller-Warrant G.W.; Griffith S.M.; Whittaker G.W.; Banowetz G.M.; Pfender W.F.; Garcia T.S.; Giannico G.R.,2012,Water,Regulating,Agriculture causes negative effects,slightly implemented,Regional,North America
Impact of multiple interacting financial incentives on land use change and the supply of ecosystem services,Bryan B.A.; Crossman N.D.,2013,"Policy, Institutions, Governmental",Several,Agriculture as supplier of ES,fully implemented,Local,Australia and New Zealand
Impacts of extensive grazing and abandonment on grassland soils and productivity,Marriott C.A.; Fisher J.M.; Hood K.; Pakeman R.J.,2010,Carbon and Nitrogen compounds,Regulating,Agriculture causes negative effects,slightly implemented,Regional,Europe
"Impacts of land use change on ecosystem services value in agro-pastoral Zone-Yanchi County of Ningxia, China",Qiu H.; Zhao Y.; Yang Y.; Zhu Q.; Yu M.,2014,"Assessment, Cultural Services",Several,Agriculture as supplier of ES,fully implemented,Regional,Asia
Implications of agricultural land use change to ecosystem services in the Ganges delta,Islam G.M.T.; Islam A.K.M.S.; Shopan A.A.; Rahman M.M.; Làzàr A.N.; Mukhopadhyay A.,2015,"Policy, Institutions, Governmental",Several,Several,fully implemented,Local,Asia
Implications of agricultural transitions and urbanization for ecosystem services,Cumming G.S.; Buerkert A.; Hoffmann E.M.; Schlecht E.; Von Cramon-Taubadel S.; Tscharntke T.,2014,"Policy, Institutions, Governmental",Several,Several,fully implemented,,
Implications of three biofuel crops for beneficial arthropods in agricultural landscapes,Gardiner M.A.; Tuell J.K.; Isaacs R.; Gibbs J.; Ascher J.S.; Landis D.A.,2010,"Biodiversity, Pollination, Pest Control, Conservation",Regulating,Agriculture as supplier of ES,fully implemented,Regional,North America
Importance of Ethiopian shade coffee farms for forest bird conservation,Buechley E.R.; _ekercio_lu T.H.; Atickem A.; Gebremichael. G.; Ndungu J.K.; Mahamued B.A.; Beyene T.; Mekonnen T.; Lens L.,2015,"Biodiversity, Pollination, Pest Control, Conservation",Provisioning,Agriculture as supplier of ES,slightly implemented,Local,Sub-Saharan Africa
Importance of landscape heterogeneity in sustaining hydrologic ecosystem services in an agricultural watershed,Qiu J.; Turner M.G.,2015,Water,Regulating,Agriculture causes negative effects,fully implemented,Regional,North America
Improved fallows: A case study of an adaptive response in Amazonian swidden farming systems,Marquardt K.; Milestad R.; Salomonsson L.,2013,"Policy, Institutions, Governmental",Several,Several,fully implemented,Local,Latin America
"Improving intercropping: A synthesis of research in agronomy, plant physiology and ecology",Brooker R.W.; Bennett A.E.; Cong W.-F.; Daniell T.J.; George T.S.; Hallett P.D.; Hawes C.; Iannetta P.P.M.; Jones H.G.; Karley A.J.; Li L.; Mckenzie B.M.; Pakeman R.J.; Paterson E.; Sch_b C.; Shen J.; Squire G.; Watson C.A.; Zhang C.; Zhang F.; Zhang J.; White P.J.,2015,Other articles,Regulating,Agriculture as supplier of ES,not implemented,Global,
Improving the link between payments and the provision of ecosystem services in agri-environment schemes,Reed M.S.; Moxey A.; Prager K.; Hanley N.; Skates J.; Bonn A.; Evans C.D.; Glenk K.; Thomson K.,2014,"Policy, Institutions, Governmental",Several,Several,fully implemented,Regional,Europe
Improving the productivity and income of Ghanaian cocoa farmers while maintaining environmental services: What role for certification?,Gockowski J.; Afari-Sefa V.; Sarpong D.B.; Osei-Asare Y.B.; Agyeman N.F.,2013,"Assessment, Cultural Services",Regulating,Agriculture causes negative effects,slightly implemented,Local,Sub-Saharan Africa
"Incentives, land use, and ecosystem services: Synthesizing complex linkages",Bryan B.A.,2013,"Policy, Institutions, Governmental",Several,Agriculture as supplier of ES,fully implemented,,
Incentivizing the provision of ecosystem services,Hanley N.; White B.,2014,"Policy, Institutions, Governmental",Several,Agriculture as supplier of ES,fully implemented,Global,
Including multiple differing stakeholder values into vulnerability assessments of socio-ecological systems,de Chazal J.; Qu_tier F.; Lavorel S.; Van Doorn A.,2008,"Assessment, Cultural Services",Several,Several,fully implemented,Local,Europe
Increased area of a highly suitable host crop increases herbivore pressure in intensified agricultural landscapes,Rand T.A.; Waters D.K.; Blodgett S.L.; Knodel J.J.; Harris M.O.,2014,"Biodiversity, Pollination, Pest Control, Conservation",Regulating,Agriculture as user of ES,fully implemented,Regional,North America
Increased productivity of a cover crop mixture is not associated with enhanced agroecosystem services,Smith R.G.; Atwood L.W.; Warren N.D.,2014,Other articles,Provisioning,Agriculture as user of ES,not implemented,Local,North America
Increasing corn for biofuel production reduces biocontrol services in agricultural landscapes,Landis D.A.; Gardiner M.M.; Van Der Werf W.; Swinton S.M.,2008,"Biodiversity, Pollination, Pest Control, Conservation",Regulating,Agriculture as user of ES,fully implemented,,North America
Increasing Demand for Natural Rubber Necessitates a Robust Sustainability Initiative to Mitigate Impacts on Tropical Biodiversity,Warren-Thomas E.; Dolman P.M.; Edwards D.P.,2015,"Biodiversity, Pollination, Pest Control, Conservation",Regulating,Agriculture causes negative effects,not implemented,Regional,Asia
Increasing flexibility in rangeland management during drought,Kachergis E.; Derner J.D.; Cutts B.B.; Roche L.M.; Eviner V.T.; Lubell M.N.; Tate K.W.,2014,"Policy, Institutions, Governmental",Several,Several,not implemented,Local,North America
Indicators and trade-offs of ecosystem services in agricultural soils along a landscape heterogeneity gradient,Williams Alwyn; Hedlund Katarina,2014,Soil,Regulating,Agriculture as supplier of ES,fully implemented,Local,Europe
Indicators of agricultural intensity and intensification: A review of the literature,Ruiz-Martinez I.; Marraccini E.; Debolini M.; Bonari1 E.,2015,"Assessment, Cultural Services",Regulating,Agriculture causes negative effects,fully implemented,Global,
Indicators of soil ecosystem services in conventional and organic arable fields along a gradient of landscape heterogeneity in southern Sweden,Williams A.; Hedlund K.,2013,Soil,Regulating,Agriculture as supplier of ES,fully implemented,Local,Europe
Influence of agricultural practices on biotic production potential and climate regulation potential. A case study for life cycle assessment of soybean (Glycine max) in Argentina,Piastrellini R.; Civit B.M.; Arena A.P.,2015,Climate,Provisioning,Agriculture as supplier of ES,fully implemented,Regional,Latin America
Influence of genetically modified organisms on agro-ecosystem processes,Kolseth A.-K.; D'Hertefeldt T.; Emmerich M.; Forabosco F.; Marklund S.; Cheeke T.E.; Hallin S.; Weih M.,2015,"Biodiversity, Pollination, Pest Control, Conservation",Several,Agriculture causes negative effects,not implemented,,
Influence of land use on water quality in a tropical landscape: A multi-scale analysis,Uriarte M.; Yackulic C.B.; Lim Y.; Arce-Nazario J.A.,2011,Water,Regulating,Agriculture causes negative effects,fully implemented,Regional,Latin America
Influence of native North American prairie grasses on predation of an insect herbivore of potato,Werling B.P.; Harmon J.; Straub C.; Gratton C.,2012,"Biodiversity, Pollination, Pest Control, Conservation",regulating,Agriculture as user of ES,not implemented,Local,North America
Innovative agroecosystem goods and services: key profitability drivers in Swiss agroforestry,Sereke F.; Graves A.R.; Dux D.; Palma J.H.N.; Herzog F.,2015,"Policy, Institutions, Governmental",Several,Agriculture as supplier of ES,fully implemented,Local,Europe
Institutional incentives for managing the landscape: Inducing cooperation for the production of ecosystem services,Goldman R.L.; Thompson B.H.; Daily G.C.,2007,"Policy, Institutions, Governmental",Several,Agriculture as supplier of ES,fully implemented,Global,
"Integrated modelling of payment for ecosystem services: Using willingness to pay and accept, for nature provision and addressing public management in cultural landscape",Nuppenau E.-A.,2014,"Biodiversity, Pollination, Pest Control, Conservation",Regulating,Agriculture as supplier of ES,fully implemented,Local,Europe
Integrated Rice-Fish Farming: Safeguarding Biodiversity and Ecosystem Services for Sustainable Food Production in the Mekong Delta,Berg H.; Berg C.; Nguyen T.T.,2012,"Biodiversity, Pollination, Pest Control, Conservation",Regulating,Several,fully implemented,Local,Asia
Integrating agroecology and landscape multifunctionality in Vermont: An evolving framework to evaluate the design of agroecosystems,Lovell S.T.; DeSantis S.; Nathan C.A.; Olson M.B.; Ernesto M_ndez V.; Kominami H.C.; Erickson D.L.; Morris K.S.; Morris W.B.,2010,"Policy, Institutions, Governmental",Several,Several,fully implemented,Local,North America
Integrating biodiversity and conservation with modern agricultural landscapes,Kumaraswamy S.; Kunte K.,2013,"Biodiversity, Pollination, Pest Control, Conservation",Regulating,Agriculture causes negative effects,slightly implemented,,
Integrating ecosystem services into risk management decisions: Case study with Spanish citrus and the insecticide chlorpyrifos,Deacon S.; Norman S.; Nicolette J.; Reub G.; Greene G.; Osborn R.; Andrews P.,2015,"Policy, Institutions, Governmental",Several,Several,fully implemented,Local,Europe
Integration of ecosystem services into the carbon footprint of milk of South German dairy farms,Robert Kiefer L.; Menzel F.; Bahrs E.,2015,Carbon and Nitrogen compounds,Several,Several,fully implemented,Regional,Europe
Intensive Agriculture and the Soil Carbon Pool,Lal R.,2013,Carbon and Nitrogen compounds,Regulating,Agriculture as supplier of ES,fully implemented,Global,
Intensive agriculture reduces soil biodiversity across Europe,Tsiafouli M.A.; Th_bault E.; Sgardelis S.P.; de Ruiter P.C.; van der Putten W.H.; Birkhofer K.; Hemerik L.; de Vries F.T.; Bardgett R.D.; Brady M.V.; Bjornlund L.; JÀrgensen H.B.; Christensen S.; Hertefeldt T.D.; Hotes S.; Gera Hol W.H.; Frouz J.; Liiri M.; Mortimer S.R.; Set_l_ H.; Tzanopoulos J.; Uteseny K.; Pi_l V.; Stary J.; Wolters V.; Hedlund K.,2015,Soil,Regulating,Agriculture as supplier of ES,slightly implemented,Regional,Europe
Interactions among ecosystem services across land uses in a floodplain agroecosystem,Felipe-Lucia M.R.; ComÕn F.A.; Bennett E.M.,2014,Water,Several,Several,fully implemented,Regional,Europe
Interactions between almond plantations and native ecosystems: Lessons learned from north-western Victoria,Luck G.W.; Spooner P.G.; Watson D.M.; Watson S.J.; Saunders M.E.,2014,"Biodiversity, Pollination, Pest Control, Conservation",Several,Several,not implemented,Regional,North America
Interactions between carbon sequestration and shade tree diversity in a smallholder coffee cooperative in El Salvador,Richards M.B.; M_ndez V.E.,2014,Carbon and Nitrogen compounds,Regulating,Agriculture as supplier of ES,slightly implemented,Regional,Latin America
Interactions between conventional and organic farming for biocontrol services across the landscape,Bianchi F.J.J.A.; Ives A.R.; Schellhorn N.A.,2013,"Biodiversity, Pollination, Pest Control, Conservation",Regulating,Agriculture as user of ES,not implemented,,
Interactive effects among ecosystem services and management practices on crop production: Pollination in coffee agroforestry systems,Boreux V.; Kushalappa C.G.; Vaast P.; Ghazoul J.,2013,"Biodiversity, Pollination, Pest Control, Conservation",Regulating,Several,fully implemented,Local,Asia
Interdisciplinary decision support dashboard: A new framework for a tanzanian agricultural and ecosystem service monitoring system pilot,Fegraus E.H.; Zaslavsky I.; Whitenack T.; Dempewolf J.; Ahumada J.A.; Lin K.; Andelman S.J.,2012,"Policy, Institutions, Governmental",Several,Agriculture causes negative effects,fully implemented,Local,Sub-Saharan Africa
Introducing urban food forestry: A multifunctional approach to increase food security and provide ecosystem services,Clark K.H.; Nicholas K.A.,2013,"Assessment, Cultural Services",Several,Agriculture as supplier of ES,not implemented,Local,North America
Investing in Natural Capital and Getting Returns: An Ecosystem Service Approach,van den Belt M.; Blake D.,2015,"Policy, Institutions, Governmental",Several,Agriculture causes negative effects,fully implemented,Global,
Is it possible to increase the sustainability of arable and ruminant agriculture by reducing inputs?,Glendining M.J.; Dailey A.G.; Williams A.G.; Evert F.K.v.; Goulding K.W.T.; Whitmore A.P.,2009,"Assessment, Cultural Services",Provisioning,Agriculture causes negative effects,slightly implemented,Regional,Europe
Is there a forest transition outside forests? Trajectories of farm trees and effects on ecosystem services in an agricultural landscape in Eastern Germany,Plieninger T.; Schleyer C.; Mantel M.; Hostert P.,2012,"Assessment, Cultural Services",Several,Agriculture as supplier of ES,fully implemented,Local,Europe
"Isolation from forest reduces pollination, seed predation and insect scavenging in Swiss farmland",Farwig N.; Bailey D.; Bochud E.; Herrmann J.D.; Kindler E.; Reusser N.; SchÙepp C.; Schmidt-Entling M.H.,2009,"Biodiversity, Pollination, Pest Control, Conservation",Regulating,Agriculture as user of ES,fully implemented,Local,Europe
Jointness in production and farmers' willingness to supply non-marketed ecosystem services,Wossink A.; Swinton S.M.,2007,Other articles,Several,Several,fully implemented,,
Kinetics of nitrate removal in wetlands receiving agricultural drainage,Karpuzcu M.E.; Stringfellow W.T.,2012,Carbon and Nitrogen compounds,Regulating,Agriculture causes negative effects,not implemented,Regional,North America
"Land use efficiency: Anticipating future demand for land-sector greenhouse gas emissions abatement and managing trade-offs with agriculture, water, and biodiversity",Bryan B.A.; Crossman N.D.; Nolan M.; Li J.; Navarro J.; Connor J.D.,2015,Carbon and Nitrogen compounds,Several,Several,fully implemented,Regional,Australia and New Zealand
Land-use change and costs to rural households: A case study in groundwater nitrate contamination,Keeler B.L.; Polasky S.,2014,Carbon and Nitrogen compounds,Regulating,Agriculture causes negative effects,fully implemented,Regional,North America
Land-use changes and carbon sequestration through the twentieth century in a Mediterranean mountain ecosystem: Implications for land management,Padilla F.M.; Vidal B.; Sànchez J.; Pugnaire F.I.,2010,Carbon and Nitrogen compounds,Regulating,Agriculture causes negative effects,fully implemented,Regional,Europe
Landcare in Australia and Germany: Comparing structures and policies for community engagement in natural resource management,Prager K.; Vanclay F.,2010,"Policy, Institutions, Governmental",Several,Agriculture as supplier of ES,not implemented,Regional,Australia and New Zealand
Landowners' incentives for constructing wetlands in an agricultural area in south Sweden,Hansson A.; Pedersen E.; Weisner S.E.B.,2012,"Policy, Institutions, Governmental",Provisioning,Agriculture as supplier of ES,fully implemented,Local,Europe
"Landscape and local factors influence water purification in the Monteregian agroecosystem in Qu_bec, Canada",Terrado M.; Tauler R.; Bennett E.M.,2015,Water,Regulating,Agriculture causes negative effects,fully implemented,Regional,North America
Landscape diversity moderates the effects of bee visitation frequency to flowers on crop production,Petersen J.D.; Nault B.A.,2014,"Biodiversity, Pollination, Pest Control, Conservation",Regulating,Agriculture as user of ES,fully implemented,Local,North America
Landscape effects on crop pollination services: Are there general patterns?,Ricketts T.H.; Regetz J.; Steffan-Dewenter I.; Cunningham S.A.; Kremen C.; Bogdanski A.; Gemmill-Herren B.; Greenleaf S.S.; Klein A.M.; Mayfield M.M.; Morandin L.A.; Ochieng' A.; Viana B.F.,2008,"Biodiversity, Pollination, Pest Control, Conservation",Regulating,Agriculture as user of ES,fully implemented,Global,
Landscape fragmentation and pollinator movement within agricultural environments: A modelling framework for exploring foraging and movement ecology,Rands S.A.,2014,"Biodiversity, Pollination, Pest Control, Conservation",Regulating,Agriculture causes negative effects,slightly implemented,Local,
Landscape perspectives on agricultural intensification and biodiversity - Ecosystem service management,Tscharntke T.; Klein A.M.; Kruess A.; Steffan-Dewenter I.; Thies C.,2005,"Biodiversity, Pollination, Pest Control, Conservation",Regulating,Several,slightly implemented,Regional,Europe
Landscape simplification promotes weed seed predation by carabid beetles (Coleoptera: Carabidae),Jonason D.; Smith H.G.; Bengtsson J.; Birkhofer K.,2013,"Biodiversity, Pollination, Pest Control, Conservation",Regulating,Agriculture as user of ES,slightly implemented,Local,Europe
Landscape structure influences modularity patterns in farm food webs: Consequences for pest control,MacFadyen S.; Gibson R.H.; Symondson W.O.C.; Memmott J.,2011,"Biodiversity, Pollination, Pest Control, Conservation",Regulating,Several,not implemented,Regional,Europe
Landscape-scale pest suppression is mediated by timing of predator arrival,Costamagna A.C.; Venables W.N.; Schellhorn N.A.,2015,"Biodiversity, Pollination, Pest Control, Conservation",Regulating,Several,not implemented,Local,Australia and New Zealand
Large-scale expansion of agriculture in Amazonia may be a no-win scenario,Oliveira L.J.C.; Costa M.H.; Soares-Filho B.S.; Coe M.T.,2013,Carbon and Nitrogen compounds,Several,Agriculture causes negative effects,fully implemented,Regional,Latin America
"Legumes for feed, food, biomaterials and bioenergy in Europe: A review",Voisin A.-S.; Gu_guen J.; Huyghe C.; Jeuffroy M.-H.; Magrini M.-B.; Meynard J.-M.; Mougel C.; Pellerin S.; Pelzer E.,2014,"Policy, Institutions, Governmental",Several,Several,slightly implemented,,Europe
Lettuce cropping with less pesticides. A review,Barrire V.; Lecompte F.; Nicot P.C.; Maisonneuve B.; Tchamitchian M.; Lescourret F.,2014,Other articles,Regulating,Agriculture as user of ES,not implemented,Global,
Linking agricultural landowners with payments for ecosystem services in the interior northwest: Resources for extension,Gwin L.; Pomeroy A.,2015,"Policy, Institutions, Governmental",Several,Agriculture as supplier of ES,fully implemented,Local,North America
Linking deforestation scenarios to pollination services and economic returns in coffee agroforestry systems,Priess J.A.; Mimler M.; Klein A.-M.; Schwarze S.; Tscharntke T.; Steffan-Dewenter I.,2007,"Policy, Institutions, Governmental",Provisioning,Agriculture as user of ES,fully implemented,Local,Asia
"Linking ecology and aesthetics in sustainable agricultural landscapes: Lessons from the Palouse region of Washington, U.S.A.",Klein L.R.; Hendrix W.G.; Lohr V.I.; Kaytes J.B.; Sayler R.D.; Swanson M.E.; Elliot W.J.; Reganold J.P.,2015,"Biodiversity, Pollination, Pest Control, Conservation",Cultural,Agriculture as supplier of ES,slightly implemented,Regional,North America
Linking ecosystem services to agri-environmental schemes through SEA: A case study from Northern Italy,Rega C.; Spaziante A.,2013,"Policy, Institutions, Governmental",Several,Several,fully implemented,Regional,Europe
Linking the restoration of rivers and riparian zones/wetlands in Europe: Sharing knowledge through case studies,Gumiero B.; Mant J.; Hein T.; Elso J.; Boz B.,2013,"Policy, Institutions, Governmental",Several,Several,fully implemented,Regional,Europe
"Living close to forests enhances people[U+05F3]s perception of ecosystem services in a forest-agricultural landscape of West Java, Indonesia",Muhamad D.; Okubo S.; Harashina K.; Parikesit; Gunawan B.; Takeuchi K.,2014,"Assessment, Cultural Services",Several,Agriculture as supplier of ES,fully implemented,Local,Asia
Local and broadscale landscape structure differentially impact predation of two potato pests,Werling B.P.; Gratton C.,2010,"Biodiversity, Pollination, Pest Control, Conservation",Regulating,Agriculture as user of ES,fully implemented,Local,North America
Local and landscape effects in a host-parasitoid interaction network along a forest-cropland gradient,Osorio S.; Arnan X.; Bassols E.; Vicens N.; Bosch J.,2015,"Biodiversity, Pollination, Pest Control, Conservation",Regulating,Agriculture as supplier of ES,not implemented,Local,Europe
Local and landscape-level floral resources explain effects of wildflower strips on wild bees across four European countries,Scheper J.; Bommarco R.; Holzschuh A.; Potts S.G.; Riedinger V.; Roberts S.P.M.; Rundl_f M.; Smith H.G.; Steffan-Dewenter I.; Wickens J.B.; Wickens V.J.; Kleijn D.,2015,"Biodiversity, Pollination, Pest Control, Conservation",Regulating,Agriculture as supplier of ES,not implemented,Local,Europe
Local ecosystem service use and assessment vary with socio-ecological conditions: A case of native coffee-forests in southwestern Ethiopia,Tadesse G.; Zavaleta E.; Shennan C.; Fitzsimmons M.,2014,"Assessment, Cultural Services",Several,Several,fully implemented,Local,Sub-Saharan Africa
"Local justice, global climate injustice inequality and tree planting in Thailand",Srang-Iam W.,2012,Carbon and Nitrogen compounds,Several,Several,slightly implemented,Local,Asia
Local knowledge of impacts of tree cover on ecosystem services in smallholder coffee production systems,Cerdàn C.R.; Rebolledo M.C.; Soto G.; Rapidel B.; Sinclair F.L.,2012,"Policy, Institutions, Governmental",Several,Agriculture as user of ES,fully implemented,Local,Latin America
Local selling as a driving force for increased on-farm biodiversity,Bj_rklund J.; Westberg L.; Geber U.; Milestad R.; Ahnstr_m J.,2009,"Biodiversity, Pollination, Pest Control, Conservation",Regulating,Several,not implemented,Local,Europe
Lost in development's shadow: The downstream human consequences of dams,Richter B.D.; Postel S.; Revenga C.; Scudder T.; Lehner B.; Churchill A.; Chow M.,2010,Water,Regulating,Agriculture as user of ES,not implemented,Global,
Lowland farmland bird conservation in the context of wider ecosystem service delivery,Bradbury R.B.; Stoate C.; Tallowin J.R.B.,2010,"Biodiversity, Pollination, Pest Control, Conservation",Provisioning,Agriculture as supplier of ES,fully implemented,Local,Europe
Macrophyte presence is an indicator of enhanced denitrification and nitrification in sediments of a temperate restored agricultural stream,Forshay K.J.; Dodson S.I.,2011,Carbon and Nitrogen compounds,Regulating,Agriculture causes negative effects,not implemented,Regional,North America
Mainstreaming ecosystem services through reformed European agricultural policies,Plieninger T.; Schleyer C.; Schaich H.; Ohnesorge B.; Gerdes H.; Hernàndez-Morcillo M.; Bieling C.,2012,"Policy, Institutions, Governmental",Several,Agriculture as supplier of ES,fully implemented,Global,Europe
Management intensity - not biodiversity - the driver of ecosystem services in a long-term row crop experiment,Snapp S.S.; Gentry L.E.; Harwood R.,2010,Carbon and Nitrogen compounds,Several,Agriculture as supplier of ES,fully implemented,Regional,North America
Managing a second-generation crop portfolio through sustainable intensification: Examples from the USA and the EU,Heaton E.A.; Schulte L.A.; Berti M.; Langeveld H.; Zegada-Lizarazu W.; Parrish D.; Monti A.,2013,"Policy, Institutions, Governmental",Several,Several,slightly implemented,,
Managing ditches for agroecological engineering of landscape. A review,Dollinger J.; Dags C.; Bailly J.-S.; Lagacherie P.; Voltz M.,2015,"Biodiversity, Pollination, Pest Control, Conservation",Several,Several,slightly implemented,Regional,Europe
Managing ecosystem services and biodiversity conservation in agricultural landscapes: Are the solutions the same?,MacFadyen S.; Cunningham S.A.; Costamagna A.C.; Schellhorn N.A.,2012,"Biodiversity, Pollination, Pest Control, Conservation",Several,Several,not implemented,,Europe
Managing ecosystem services and pests in broadacre landscapes,Lawrence L.; Schellhorn N.; Macfadyen S.; Bianchi F.,2009,"Biodiversity, Pollination, Pest Control, Conservation",Regulating,Several,slightly implemented,Regional,Australia and New Zealand
Managing ecosystem services for agriculture: Will landscape-scale management pay_,Cong R.-G.; Smith H.G.; Olsson O.; Brady M.,2014,"Policy, Institutions, Governmental",Regulating,Several,fully implemented,Global,
Managing habitats on English farmland for insect pollinator conservation,Holland J.M.; Smith B.M.; Storkey J.; Lutman P.J.W.; Aebischer N.J.,2015,"Biodiversity, Pollination, Pest Control, Conservation",Regulating,Agriculture as supplier of ES,slightly implemented,Local,Europe
Managing increasing environmental risks through agrobiodiversity and agrienvironmental policies,Baumg_rtner S.; Quaas M.F.,2010,"Policy, Institutions, Governmental",Regulating,Agriculture as user of ES,fully implemented,Global,
Managing soil natural capital: An effective strategy for mitigating future agricultural risks?,Cong R.-G.; Hedlund K.; Andersso H.; Brady M.,2014,Soil,Regulating,Agriculture as user of ES,fully implemented,Regional,Europe
Managing water in agriculture for food production and other ecosystem services,Gordon L.J.; Finlayson C.M.; Falkenmark M.,2010,Water,Regulating,Agriculture causes negative effects,fully implemented,Global,
Managing woody bamboos for carbon farming and carbon trading,Nath A.J.; Lal R.; Das A.K.,2015,Carbon and Nitrogen compounds,Several,Agriculture as supplier of ES,fully implemented,Global,
Mapping ecosystem service and biodiversity changes over 70 years in a rural English county,Jiang M.; Bullock J.M.; Hooftman D.A.P.,2013,Carbon and Nitrogen compounds,Several,Agriculture causes negative effects,fully implemented,Regional,Europe
Mapping Soil Erosion Prevention Using an Ecosystem Service Modeling Framework for Integrated Land Management and Policy,Guerra C.A.; Pinto-Correia T.; Metzger M.J.,2014,"Assessment, Cultural Services",Regulating,Agriculture as supplier of ES,slightly implemented,Local,Europe
Mapping the margin: Comparing marginal values of tropical forest remnants for pollination services,Ricketts T.H.; Lonsdorf E.,2013,"Biodiversity, Pollination, Pest Control, Conservation",Regulating,Agriculture as user of ES,fully implemented,Local,Latin America
"Marginal effects on biodiversity, carbon sequestration and nutrient cycling of transitions from tropical forests to cacao farming systems",Obeng E.A.; Aguilar F.X.,2015,Carbon and Nitrogen compounds,Regulating,Agriculture causes negative effects,slightly implemented,Global,
Mass flowering oilseed rape improves early colony growth but not sexual reproduction of bumblebees,Westphal C.; Steffan-Dewenter I.; Tscharntke T.,2009,"Biodiversity, Pollination, Pest Control, Conservation",Regulating,Agriculture as supplier of ES,slightly implemented,Local,Europe
Mass-flowering crops increase richness of cavity-nesting bees and wasps in modern agro-ecosystems,Diek_tter T.; Peter F.; Jauker B.; Wolters V.; Jauker F.,2014,"Biodiversity, Pollination, Pest Control, Conservation",Regulating,Agriculture as supplier of ES,not implemented,Local,Europe
Maximizing arthropod-mediated ecosystem services in agricultural landscapes: The role of native plants,Isaacs R.; Tuell J.; Fiedler A.; Gardiner M.; Landis D.,2009,"Biodiversity, Pollination, Pest Control, Conservation",Provisioning,Several,slightly implemented,,
Maximizing the environmental benefits of carbon farming through ecosystem service delivery,Lin B.B.; Macfadyen S.; Renwick A.R.; Cunningham S.A.; Schellhorn N.A.,2013,Carbon and Nitrogen compounds,Regulating,Several,fully implemented,Global,
Measures of the effects of agricultural practices on ecosystem services,Dale V.H.; Polasky S.,2007,"Policy, Institutions, Governmental",Several,Several,fully implemented,,
Measuring ecosystem service change: A case study from a northwest Arkansas dairy farm,Leh M.; Matlock M.; Cummings E.; Thoma G.; Cothren J.,2013,Other articles,Several,Several,fully implemented,Local,North America
"Migration and dispersal may drive to high genetic variation and significant genetic mixing: The case of two agriculturally important, continental hoverflies (Episyrphus balteatus and Sphaerophoria scripta)",Raymond L.; Plantegenest M.; Vialatte A.,2013,"Biodiversity, Pollination, Pest Control, Conservation",Regulating,Agriculture as user of ES,not implemented,Regional,Europe
Minimum-data analysis of ecosystem service supply in semi-subsistence agricultural systems,Antle J.M.; Diagana B.; Stoorvogel J.J.; Valdivia R.O.,2010,"Policy, Institutions, Governmental",Regulating,Agriculture as supplier of ES,fully implemented,Local,Sub-Saharan Africa
Mitigation and adaptation investments for desertification and climate change: An assessment of the socioeconomic return,Salinas C.X.; Mendieta J.,2013,Climate,Provisioning,Agriculture as supplier of ES,slightly implemented,Regional,Latin America
Mixed effects of landscape complexity and farming practice on weed seed removal,Fischer C.; Thies C.; Tscharntke T.,2011,"Biodiversity, Pollination, Pest Control, Conservation",Regulating,Several,slightly implemented,Local,Europe
Mixed effects of organic farming and landscape complexity on farmland biodiversity and biological control potential across Europe,Winqvist C.; Bengtsson J.; Aavik T.; Berendse F.; Clement L.W.; Eggers S.; Fischer C.; Flohre A.; Geiger F.; Liira J.; P_rt T.; Thies C.; Tscharntke T.; Weisser W.W.; Bommarco R.,2011,"Biodiversity, Pollination, Pest Control, Conservation",Regulating,Several,fully implemented,Regional,Europe
Modeling denitrification in an agricultural catchment in Central New York,Barclay J.R.; Anderson T.R.; Archibald J.A.; Walter M.T.,2015,Carbon and Nitrogen compounds,Regulating,Agriculture causes negative effects,fully implemented,Regional,North America
Modeling the production of multiple ecosystem services from agricultural and forest landscapes in Rhode Island,Liu T.; Merrill N.H.; Gold A.J.; Kellogg D.Q.; Uchida E.,2013,Water,Provisioning,Agriculture as user of ES,fully implemented,Local,North America
Modeling trade-offs among ecosystem services in agricultural production systems,Balbi S.; del Prado A.; Gallejones P.; Geevan C.P.; Pardo G.; P_rez-MiÐana E.; Manrique R.; Hernandez-Santiago C.; Villa F.,2015,"Assessment, Cultural Services",Several,Several,fully implemented,Local,Europe
Modelling adaptive management of intercropping in vineyards to satisfy agronomic and environmental performances under Mediterranean climate,Ripoche A.; Rellier J.-P.; Martin-Clouaire R.; Par_ N.; Biarns A.; Gary C.,2011,Soil,Provisioning,Agriculture as supplier of ES,slightly implemented,Regional,Europe
Modelling farmer decision-making to anticipate tradeoffs between provisioning ecosystem services and biodiversity,Guillem E.E.; Murray-Rust D.; Robinson D.T.; Barnes A.; Rounsevell M.D.A.,2015,"Biodiversity, Pollination, Pest Control, Conservation",Provisioning,Several,not implemented,Local,Europe
Modelling interaction networks for enhanced ecosystem services in agroecosystems,Tixier P.; Peyrard N.; Aubertot J.-N.; Gaba S.; Radoszycki J.; Caron-Lormier G.; Vinatier F.; Mollot G.; Sabbadin R.,2013,"Biodiversity, Pollination, Pest Control, Conservation",Regulating,Agriculture as user of ES,fully implemented,Global,
Modelling interactions between scavenger behaviour and farming practices: Impacts on scavenger population and ecosystem service efficiency,Dupont H.; Mihoub J.B.; Becu N.; Sarrazin F.,2011,"Biodiversity, Pollination, Pest Control, Conservation",Regulating,Agriculture as user of ES,slightly implemented,Regional,Europe
Modelling pollination services across agricultural landscapes,Lonsdorf E.; Kremen C.; Ricketts T.; Winfree R.; Williams N.; Greenleaf S.,2009,"Biodiversity, Pollination, Pest Control, Conservation",Regulating,Agriculture as user of ES,fully implemented,Local,North America
Modelling the supply of ecosystem services from agriculture: A minimum-data approach,Antle J.M.; Valdivia R.O.,2006,Carbon and Nitrogen compounds,Regulating,Several,fully implemented,Regional,North America
Monitoring directions and rates of change in trees outside forests through multitemporal analysis of map sequences,Plieninger T.,2012,"Assessment, Cultural Services",Several,Several,slightly implemented,Local,Europe
MOSAICA: A multi-scale bioeconomic model for the design and ex ante assessment of cropping system mosaics,Chopin P.; Dor_ T.; Guind_ L.; Blazy J.-M.,2015,"Assessment, Cultural Services",Provisioning,Agriculture as supplier of ES,slightly implemented,Local,Latin America
Moth diversity in three biofuel crops and native prairie in Illinois,Harrison T.; Berenbaum M.R.,2013,"Biodiversity, Pollination, Pest Control, Conservation",Provisioning,Agriculture as supplier of ES,not implemented,Regional,North America
Multifunctional urban agriculture for sustainable land use planning in the United States,Lovell S.T.,2010,"Policy, Institutions, Governmental",Several,Several,slightly implemented,Regional,North America
Multifunctionality of agricultural water: Looking beyond food production and ecosystem services,Groenfeldt D.,2006,"Policy, Institutions, Governmental",Several,Several,fully implemented,Regional,Asia
Multiple criteria for evaluating pollinator performance in highbush blueberry (Ericales: Ericaceae) agroecosystems,Rogers S.R.; Tarpy D.R.; Burrack H.J.,2013,"Biodiversity, Pollination, Pest Control, Conservation",Regulating,Agriculture as user of ES,fully implemented,Local,North America
Multiple cropping systems as drivers for providing multiple ecosystem services: from concepts to design,Gaba S.; Lescourret F.; Boudsocq S.; Enjalbert J.; Hinsinger P.; Journet E.-P.; Navas M.-L.; Wery J.; Louarn G.; Mal_zieux E.; Pelzer E.; Prudent M.; Ozier-Lafontaine H.,2015,Other articles,Several,Several,fully implemented,,
Multiple-use zoning model for private forest owners in agricultural landscapes: A case study,Truax B.; Gagnon D.; Lambert F.; Fortier J.,2015,"Biodiversity, Pollination, Pest Control, Conservation",Several,Several,not implemented,Regional,North America
Multitrophic microbial interactions for eco- and agro-biotechnological processes: Theory and practice,Saleem M.; Moe L.A.,2014,"Biodiversity, Pollination, Pest Control, Conservation",Provisioning,Agriculture as supplier of ES,not implemented,Global,
National patterns of functional diversity and redundancy in predatory ground beetles and bees associated with key UK arable crops,Woodcock B.A.; Harrower C.; Redhead J.; Edwards M.; Vanbergen A.J.; Heard M.S.; Roy D.B.; Pywell R.F.,2014,"Biodiversity, Pollination, Pest Control, Conservation",Regulating,Agriculture as supplier of ES,fully implemented,Local,Europe
Native bees provide insurance against ongoing honey bee losses,Winfree R.; Williams N.M.; Dushoff J.; Kremen C.,2007,"Biodiversity, Pollination, Pest Control, Conservation",Regulating,Agriculture as user of ES,fully implemented,Local,North America
Natural and within-farmland biodiversity enhances crop productivity,Carvalheiro L.G.; Veldtman R.; Shenkute A.G.; Tesfay G.B.; Pirk C.W.W.; Donaldson J.S.; Nicolson S.W.,2011,"Biodiversity, Pollination, Pest Control, Conservation",Regulating,Several,fully implemented,Local,Sub-Saharan Africa
Natural enemies depend on remnant habitat size in agricultural landscapes,Jordani M.X.; Hasui Ä.; da Silva V.X.,2015,"Biodiversity, Pollination, Pest Control, Conservation",Regulating,Agriculture as user of ES,slightly implemented,Local,Latin America
Natural enemy interactions constrain pest control in complex agricultural landscapes,Martin E.A.; Reineking B.; Seo B.; Steffan-Dewenter I.,2013,"Biodiversity, Pollination, Pest Control, Conservation",Regulating,Agriculture as user of ES,fully implemented,Local,Asia
Natural enemy-mediated indirect interactions among prey species: Potential for enhancing biocontrol services in agroecosystems,Chailleux A.; Mohl E.K.; Teixeira Alves M.; Messelink G.J.; Desneux N.,2014,"Biodiversity, Pollination, Pest Control, Conservation",Regulating,Several,slightly implemented,,
Natural habitat does not mediate vertebrate seed predation as an ecosystem dis-service to agriculture,Sch_ckermann J.; Mandelik Y.; Weiss N.; von Wehrden H.; Klein A.-M.,2015,"Biodiversity, Pollination, Pest Control, Conservation",Regulating,Agriculture as user of ES,fully implemented,Local,Middle East and Northern Africa
"Natural pest control in citrus as an ecosystem service: Integrating ecology, economics and management at the farm scale",Colloff M.J.; Lindsay E.A.; Cook D.C.,2013,"Biodiversity, Pollination, Pest Control, Conservation",Regulating,Several,fully implemented,Local,Australia and New Zealand
Natural vegetation benefits synergistic control of the three main insect and pathogen pests of a fruit crop in southern Africa,Henri D.C.; Jones O.; Tsiattalos A.; Th_bault E.; Seymour C.L.; van Veen F.J.F.,2015,"Biodiversity, Pollination, Pest Control, Conservation",Regulating,Agriculture as user of ES,fully implemented,Local,Sub-Saharan Africa
"Neonicotinoid insecticide travels through a soil food chain, disrupting biological control of non-target pests and decreasing soya bean yield",Douglas M.R.; Rohr J.R.; Tooker J.F.,2015,"Biodiversity, Pollination, Pest Control, Conservation",Regulating,Agriculture causes negative effects,slightly implemented,Regional,North America
No adverse effect of moderate stubble grazing on soil quality and organic carbon pool in dryland wheat agro-ecosystems,Stavi I.; Barkai D.; Islam K.R.; Zaady E.,2015,Carbon and Nitrogen compounds,Several,Agriculture as supplier of ES,slightly implemented,Regional,Europe
"No-till systems: Gains and drawbacks for carbon sequestration, ecosystem services and environmental health",Stavi I.; Argaman E.,2014,Carbon and Nitrogen compounds,Regulating,Agriculture causes negative effects,fully implemented,,
Non-crop habitats in the landscape enhance spider diversity in wheat fields of a desert agroecosystem,Pluess T.; Opatovsky I.; Gavish-Regev E.; Lubin Y.; Schmidt-Entling M.H.,2010,"Biodiversity, Pollination, Pest Control, Conservation",Provisioning,Agriculture as supplier of ES,slightly implemented,Regional,Middle East and Northern Africa
Non-linear effects of pesticide application on biodiversity-driven ecosystem services and disservices in a cacao agroecosystem: A modeling study,Sabatier R.; Meyer K.; Wiegand K.; Clough Y.,2013,"Biodiversity, Pollination, Pest Control, Conservation",Regulating,Agriculture causes negative effects,fully implemented,Local,
Nonrandom extinction patterns can modulate pest control service decline,Karp D.S.; Moeller H.V.; Frishkoff L.O.,2013,"Biodiversity, Pollination, Pest Control, Conservation",Regulating,Several,slightly implemented,,
Nutrient loading associated with agriculture land use dampens the importance of consumer-mediated niche construction,Spooner D.E.; Frost P.C.; Hillebrand H.; Arts M.T.; Puckrin O.; Xenopoulos M.A.,2013,Carbon and Nitrogen compounds,Regulating,Agriculture causes negative effects,slightly implemented,Regional,North America
"Obstacles and options for the design and implementation of payment schemes for ecosystem services provided through farm trees in Saxony, Germany",Schleyer C.; Plieninger T.,2011,"Policy, Institutions, Governmental",Several,Agriculture as supplier of ES,fully implemented,Regional,Europe
Oilseed rape crops distort plant-pollinator interactions,Diek_tter T.; Kadoya T.; Peter F.; Wolters V.; Jauker F.,2010,"Biodiversity, Pollination, Pest Control, Conservation",Regulating,Agriculture causes negative effects,not implemented,Local,Europe
On the value of agricultural biodiversity,Di Falco S.,2012,"Biodiversity, Pollination, Pest Control, Conservation",Several,Agriculture as user of ES,slightly implemented,,
On the verge? Preferential use of road-facing hedgerow margins by bumblebees in agro-ecosystems,Hanley M.E.; Wilkins J.P.,2015,"Biodiversity, Pollination, Pest Control, Conservation",Regulating,Several,slightly implemented,Local,Europe
Opportunities and limitations for functional agrobiodiversity in the European context,Bianchi F.J.J.A.; Mikos V.; Brussaard L.; Delbaere B.; Pulleman M.M.,2013,"Policy, Institutions, Governmental",Several,Agriculture as supplier of ES,slightly implemented,Regional,Europe
"Optimizing agri-environment schemes for biodiversity, ecosystem services or both?",Ekroos J.; Olsson O.; Rundl_f M.; W_tzold F.; Smith H.G.,2014,"Biodiversity, Pollination, Pest Control, Conservation",Regulating,Several,fully implemented,Regional,Europe
"Optimizing environmental measures for landscape multifunctionality: Effectiveness, efficiency and recommendations for agri-environmental programs",Galler C.; von Haaren C.; Albert C.,2015,"Policy, Institutions, Governmental",Several,Several,fully implemented,Local,Europe
Organic agriculture and ecosystem services,Sandhu H.S.; Wratten S.D.; Cullen R.,2010,"Policy, Institutions, Governmental",Several,Agriculture as supplier of ES,fully implemented,Local,Australia and New Zealand
Organic Agriculture Supports Biodiversity and Sustainable Food Production,Underwood T.; McCullum-Gomez C.; Harmon A.; Roberts S.,2011,"Biodiversity, Pollination, Pest Control, Conservation",Several,Several,slightly implemented,Local,North America
Organic farming and host density affect parasitism rates of tortricid moths in vineyards,Rusch A.; Delbac L.; Muneret L.; Thi_ry D.,2015,"Biodiversity, Pollination, Pest Control, Conservation",Regulating,Agriculture as user of ES,slightly implemented,Local,Europe
Organic farming fosters agroecosystem functioning in Argentinian temperate soils: Evidence from litter decomposition and soil fauna,DomÕnguez A.; Bedano J.C.; Becker A.R.; Arolfo R.V.,2014,Soil,Regulating,Agriculture as supplier of ES,fully implemented,Regional,Latin America
Organic farming in isolated landscapes does not benefit flower-visiting insects and pollination,Brittain C.; Bommarco R.; Vighi M.; Settele J.; Potts S.G.,2010,"Biodiversity, Pollination, Pest Control, Conservation",Regulating,Agriculture as supplier of ES,slightly implemented,Local,Europe
Organic grain cropping systems to enhance ecosystem services,Cavigelli M.A.; Mirsky S.B.; Teasdale J.R.; Spargo J.T.; Doran J.,2013,Soil,Several,Agriculture as supplier of ES,fully implemented,Regional,North America
Parasitoid diversity reduces the variability in pest control services across time on farms,Macfadyen S.; Craze P.G.; Polaszek A.; van Achterberg K.; Memmott J.,2011,"Biodiversity, Pollination, Pest Control, Conservation",Regulating,Agriculture as user of ES,slightly implemented,Local,Europe
Participatory rural appraisal of ecosystem services of wetlands in the Amazonian Piedmont of Colombia: Elements for a sustainable management concept,Ricaurte L.F.; Wantzen K.M.; Agudelo E.; Betancourt B.; Jokela J.,2014,"Biodiversity, Pollination, Pest Control, Conservation",Several,Several,fully implemented,Regional,Latin America
Past and future impacts of land use and climate change on agricultural ecosystem services in the Czech Republic,Lorencovà E.; Fr_lichovà J.; Nelson E.; Va_kà_ D.,2013,Climate,Provisioning,Agriculture as user of ES,fully implemented,Regional,Europe
"Payment for ecosystem services, sustained behavioural change, and adaptive management: Peasant perspectives in the Colombian Andes",Hayes T.M.,2012,"Policy, Institutions, Governmental",Several,Agriculture causes negative effects,slightly implemented,Local,Latin America
"Payments for ecosystem services in Amazonia. The challenge of land use heterogeneity in agricultural frontiers near Cruzeiro do Sul (Acre,Brazil)",Eloy L.; M_ral P.; Ludewigs T.; Pinheiro G.T.; Singer B.,2012,"Policy, Institutions, Governmental",Regulating,Agriculture causes negative effects,fully implemented,Local,Latin America
Payments for ecosystem services in relation to US and UK agri-environmental policy: Disruptive neoliberal innovation or hybrid policy adaptation?,Potter C.A.; Wolf S.A.,2014,"Policy, Institutions, Governmental",Several,Agriculture as supplier of ES,fully implemented,Global,Europe
Payments for ecosystem services: A review and comparison of developing and industrialized countries,Schomers S.; Matzdorf B.,2013,"Policy, Institutions, Governmental",Several,Several,fully implemented,global,
Payments for ecosystem services: Justified or not? A political view,Van Hecken G.; Bastiaensen J.,2010,"Policy, Institutions, Governmental",Several,Agriculture causes negative effects,fully implemented,Global,
Perceptions of energy crop production by lay people and farmers using the ecosystem services approach,Lupp G.; Bastian O.; Syrbe R.-U.; Steinh_u¤er R.,2014,"Assessment, Cultural Services",Several,Several,fully implemented,Local,Europe
"Perennial habitat fragments, parasitoid diversity and parasitism in ephemeral crops",Letourneau D.K.; Bothwell Allen S.G.; Stireman J.O.,2012,"Biodiversity, Pollination, Pest Control, Conservation",Regulating,Agriculture as user of ES,slightly implemented,Local,North America
Pest control experiments show benefits of complexity at landscape and local scales,Chaplin-Kramer R.; Kremen C.,2012,"Biodiversity, Pollination, Pest Control, Conservation",Regulating,Several,fully implemented,Local,North America
Pest control service provided by bats in Mediterranean rice paddies: Linking agroecosystems structure to ecological functions,Puig-Montserrat X.; Torre I.; LÑpez-Baucells A.; Guerrieri E.; Monti M.M.; Röfols-GarcÕa R.; Ferrer X.; Gisbert D.; Flaquer C.,2015,"Biodiversity, Pollination, Pest Control, Conservation",Regulating,Agriculture as user of ES,fully implemented,Local,Europe
Pest-removal services provided by birds on small organic farms in northern California,Garfinkel M.; Johnson M.,2015,"Biodiversity, Pollination, Pest Control, Conservation",Regulating,Agriculture as user of ES,fully implemented,Local,North America
Pesticide de-contamination of surface waters as a wetland ecosystem service in agricultural landscapes,Tournebize J.; Passeport E.; Chaumont C.; Fesneau C.; Guenne A.; Vincent B.,2013,Water,Regulating,Agriculture causes negative effects,not implemented,Local,Europe
Phytodiversity of temperate permanent grasslands: Ecosystem services for agriculture and livestock management for diversity conservation,Wrage N.; Strodthoff J.; Cuchillo H.M.; Isselstein J.; Kayser M.,2011,"Biodiversity, Pollination, Pest Control, Conservation",Several,Several,fully implemented,,
Phytotoxicity testing for herbicide regulation: Shortcomings in relation to biodiversity and ecosystem services in agrarian systems,Boutin C.; Aya K.L.; Carpenter D.; Thomas P.J.; Rowland O.,2012,"Biodiversity, Pollination, Pest Control, Conservation",Regulating,Agriculture causes negative effects,slightly implemented,Local,North America
Plant and arthropod diversity patterns of maize agro-ecosystems in two grassy biomes of South Africa,Botha M.; Siebert S.J.; van den Berg J.; Maliba B.G.; Ellis S.M.,2015,"Biodiversity, Pollination, Pest Control, Conservation",Several,Several,slightly implemented,Local,Sub-Saharan Africa
Plant composition modulates arthropod pest and predator abundance: Evidence for culling exotics and planting natives,Parry H.R.; Macfadyen S.; Hopkinson J.E.; Bianchi F.J.J.A.; Zalucki M.P.; Bourne A.; Schellhorn N.A.,2015,"Biodiversity, Pollination, Pest Control, Conservation",Regulating,Agriculture as supplier of ES,slightly implemented,Regional,Australia and New Zealand
Plant trait-based models identify direct and indirect effects of climate change on bundles of grassland ecosystem services,Lamarque P.; Lavorel S.; Mouchet M.; Qu_tier F.,2014,Climate,Provisioning,Agriculture as user of ES,fully implemented,Regional,Europe
Policy and Legal Frameworks Governing Trees: Incentives or Disincentives for Smallholder Tree Planting Decisions in Cameroon?,Foundjem-Tita D.; Tchoundjeu Z.; Speelman S.; D'Haese M.; Degrande A.; Asaah E.; van Huylenbroeck G.; van Damme P.; Ndoye O.,2013,"Policy, Institutions, Governmental",Several,Several,not implemented,Regional,Latin America
"Pollination by nocturnal Lepidoptera, and the effects of light pollution: A review",Macgregor C.J.; Pocock M.J.O.; Fox R.; Evans D.M.,2015,"Biodiversity, Pollination, Pest Control, Conservation",Regulating,Agriculture as user of ES,slightly implemented,,
Pollination ecosystem services in South African agricultural systems,Melin A.; Rouget M.; Midgley J.J.; Donaldson J.S.,2014,"Biodiversity, Pollination, Pest Control, Conservation",Regulating,Agriculture as user of ES,fully implemented,Regional,Sub-Saharan Africa
Pollination services decline with distance from natural habitat even in biodiversity-rich areas,Carvalheiro L.G.; Seymour C.L.; Veldtman R.; Nicolson S.W.,2010,"Biodiversity, Pollination, Pest Control, Conservation",Regulating,Agriculture as user of ES,fully implemented,Local,Sub-Saharan Africa
Pollinator body size mediates the scale at which land use drives crop pollination services,Benjamin F.E.; Reilly J.R.; Winfree R.,2014,"Biodiversity, Pollination, Pest Control, Conservation",Regulating,Agriculture as user of ES,fully implemented,Local,North America
Pollinator habitat enhancement: Benefits to other ecosystem services,Wratten S.D.; Gillespie M.; Decourtye A.; Mader E.; Desneux N.,2012,"Policy, Institutions, Governmental",Provisioning,Agriculture as supplier of ES,fully implemented,Global,
Pollinator shortage and global crop yield: Looking at the whole spectrum of pollinator dependency,Garibaldi L.A.; Aizen M.A.; Cunningham S.A.; Klein A.M.,2009,"Biodiversity, Pollination, Pest Control, Conservation",Regulating,Agriculture as user of ES,slightly implemented,Global,
Pollinators and pollination of oilseed rape crops (Brassica napus L.) in Ireland: Ecological and economic incentives for pollinator conservation,Stanley D.A.; Gunning D.; Stout J.C.,2013,"Biodiversity, Pollination, Pest Control, Conservation",Regulating,Agriculture as user of ES,fully implemented,Local,Europe
Pollinators provide economic incentive to preserve natural land in agroecosystems,Morandin L.A.; Winston M.L.,2006,"Biodiversity, Pollination, Pest Control, Conservation",Regulating,Agriculture as user of ES,fully implemented,Local,North America
Potential negative effects of exotic honey bees on the diversity of native pollinators and yield of highland coffee plantations,Badano E.I.; Vergara C.H.,2011,"Biodiversity, Pollination, Pest Control, Conservation",Regulating,Agriculture as user of ES,fully implemented,Local,Latin America
Potential tree and soil carbon storage in a major historical floodplain forest with disrupted ecological function,Hanberry B.B.; Kabrick J.M.; He H.S.,2015,Carbon and Nitrogen compounds,Regulating,Agriculture causes negative effects,fully implemented,Regional,North America
Poverty alleviation strategies in eastern China lead to critical ecological dynamics,Zhang K.; Dearing J.A.; Dawson T.P.; Dong X.; Yang X.; Zhang W.,2015,"Policy, Institutions, Governmental",Several,Agriculture causes negative effects,fully implemented,Local,Asia
Predation pressure in Ugandan cotton fields measured by a sentinel prey method,Howe A.G.; Nachman G.; L_vei G.L.,2015,"Biodiversity, Pollination, Pest Control, Conservation",Regulating,Agriculture as user of ES,fully implemented,Local,Sub-Saharan Africa
Predator body sizes and habitat preferences predict predation rates in an agroecosystem,Rusch A.; Birkhofer K.; Bommarco R.; Smith H.G.; Ekbom B.,2015,"Biodiversity, Pollination, Pest Control, Conservation",Regulating,Several,slightly implemented,Local,Europe
Predicted Effect of Landscape Position on Wildlife Habitat Value of Conservation Reserve Enhancement Program Wetlands in a Tile-drained Agricultural Region,Otis D.L.; Crumpton W.R.; Green D.; Loan-Wilsey A.; Cooper T.; Johnson R.R.,2013,"Biodiversity, Pollination, Pest Control, Conservation",Several,Agriculture causes negative effects,not implemented,Local,North America
Predicting the impacts of bioenergy production on farmland birds,Rivas Casado M.; Mead A.; Burgess P.J.; Howard D.C.; Butler S.J.,2014,"Biodiversity, Pollination, Pest Control, Conservation",Provisioning,Agriculture causes negative effects,not implemented,Local,Europe
Preferences for European agrarian landscapes: A meta-analysis of case studies,Van Zanten B.T.; Verburg P.H.; Koetse M.J.; Van Beukering P.J.H.,2014,"Assessment, Cultural Services",Cultural,Agriculture as supplier of ES,slightly implemented,Regional,Europe
Prioritizing farmland preservation cost-effectively for multiple objectives,Machado E.A.; Stoms D.M.; Davis F.W.; Kreitler J.,2006,"Policy, Institutions, Governmental",Several,Agriculture as supplier of ES,slightly implemented,Local,North America
Process modelling to assess the sequestration and productivity benefits of soil carbon for pasture,Meyer R.; Cullen B.R.; Johnson I.R.; Eckard R.J.,2015,Carbon and Nitrogen compounds,Several,Several,fully implemented,Local,Australia and New Zealand
Profiling crop pollinators: Life history traits predict habitat use and crop visitation by Mediterranean wild bees,Pisanty G.; Mandelik Y.,2015,"Biodiversity, Pollination, Pest Control, Conservation",Regulating,Agriculture as user of ES,fully implemented,Local,Middle East and Northern Africa
Progress and challenges in agricultural applications of arbuscular mycorrhizal Fungi,Fester T.; Sawers R.,2011,"Biodiversity, Pollination, Pest Control, Conservation",Several,Agriculture as user of ES,slightly implemented,Global,
Prospects for forest-based ecosystem services in forest-coffee mosaics as forest loss continues in southwestern Ethiopia,Tadesse G.; Zavaleta E.; Shennan C.; FitzSimmons M.,2014,"Assessment, Cultural Services",Several,Agriculture as supplier of ES,fully implemented,Regional,Sub-Saharan Africa
Protected areas for conservation and poverty alleviation: Experiences from Madagascar,Gardner C.J.; Nicoll M.E.; Mbohoahy T.; Oleson K.L.L.; Ratsifandrihamanana A.N.; Ratsirarson J.; Ren_ de Roland L.-A.; Virah-Sawmy M.; Zafindrasilivonona B.; Davies Z.G.,2013,"Biodiversity, Pollination, Pest Control, Conservation",Several,Several,not implemented,Regional,Sub-Saharan Africa
"Protein crop production at the northern margin of farming: To boost, or not to boost",Peltonen-Sainio P.; Niemi J.K.,2012,Other articles,Provisioning,Agriculture as supplier of ES,slightly implemented,Regional,Europe
Provision of contrasting ecosystem services by soil communities from different agricultural fields,Verbruggen Erik; Kiers E. Toby; Bakelaar Patrick N. C.; R_ling Wilfred F. M.; Heijden Marcel G. A. van der,2011,Soil,Regulating,Agriculture as supplier of ES,slightly implemented,Regional,Europe
Proximity to forest edge does not affect crop production despite pollen limitation,Chacoff N.P.; Aizen M.A.; Aschero V.,2008,"Biodiversity, Pollination, Pest Control, Conservation",Regulating,Several,fully implemented,Local,Latin America
Public demand for preserving local open space,Kline J.D.,2006,"Policy, Institutions, Governmental",Cultural,Agriculture as supplier of ES,fully implemented,Regional,North America
"Public policy, private landholders: Perspectives on policy mechanisms for sustainable land management",Cocklin C.; Mautner N.; Dibden J.,2007,"Policy, Institutions, Governmental",Several,Several,slightly implemented,Local,Australia and New Zealand
"Quantification of the impact of land-use changes on ecosystem services: A case study in Pingbian County, China",Li R.-Q.; Dong M.; Cui J.-Y.; Zhang L.-L.; Cui Q.-G.; He W.-M.,2007,"Policy, Institutions, Governmental",Several,Several,fully implemented,Local,Asia
Quantifying and mapping ecosystem services: Demand and supply of pollination in the European Union,Schulp C.J.E.; Lautenbach S.; Verburg P.H.,2014,"Biodiversity, Pollination, Pest Control, Conservation",Regulating,Agriculture as user of ES,fully implemented,Regional,Europe
Quantifying and mapping multiple ecosystem services change in West Africa,Leh M.D.K.; Matlock M.D.; Cummings E.C.; Nalley L.L.,2013,"Assessment, Cultural Services",Several,Several,fully implemented,Regional,Sub-Saharan Africa
Quantifying ecosystem services trade-offs from agricultural practices,Kragt M.E.; Robertson M.J.,2014,Other articles,Several,Agriculture as user of ES,fully implemented,Local,Australia and New Zealand
"Quantifying the contribution of birds to the control of arthropod pests on kale, Brassica oleracea acephala, a key crop in East African highland farmland",Ndang'ang'a P.K.; Njoroge J.B.M.; Vickery J.,2013,"Biodiversity, Pollination, Pest Control, Conservation",Regulating,Agriculture as user of ES,not implemented,Regional,Sub-Saharan Africa
Quantifying the impacts of bioenergy crops on pollinating insect abundance and diversity: A field-scale evaluation reveals taxon-specific responses,Stanley D.A.; Stout J.C.,2013,"Biodiversity, Pollination, Pest Control, Conservation",Regulating,Agriculture as supplier of ES,slightly implemented,Local,Europe
Quantifying the impacts of ecological restoration on biodiversity and ecosystem services in agroecosystems: A global meta-analysis,Barral M.P.; Rey Benayas J.M.; Meli P.; Maceira N.O.,2015,"Biodiversity, Pollination, Pest Control, Conservation",Several,Several,fully implemented,Global,
Quantifying the multifunctionality of fjord and mountain agriculture by means of sociocultural and economic valuation of ecosystem services,Bernu_s A.; RodrÕguez-Ortega T.; Alfnes F.; Clemetsen M.; Eik L.O.,2015,"Policy, Institutions, Governmental",Several,Agriculture as supplier of ES,fully implemented,Local,Europe
Rapid assessment of ecosystem services provided by two mineral extraction sites restored for nature conservation in an agricultural landscape in eastern england,Blaen P.J.; Jia L.; Peh K.S.-H.; Field R.H.; Balmford A.; MacDonald M.A.; Bradbury R.B.,2015,"Biodiversity, Pollination, Pest Control, Conservation",Several,Several,fully implemented,Local,Europe
"Reading ecosystem services at the local scale through a territorial approach: The case of peri-urban agriculture in the thau Lagoon, Southern France",Ruoso L.-E.; Plant R.; Maurel P.; Dupaquier C.; Roche P.K.; Bonin M.,2015,"Assessment, Cultural services",Several,Several,fully implemented,Local,Europe
Realising multiple ecosystem services based on the response of three beneficial insect groups to floral traits and trait diversity,Campbell A.J.; Biesmeijer J.C.; Varma V.; W_ckers F.L.,2012,"Biodiversity, Pollination, Pest Control, Conservation",Regulating,Agriculture as supplier of ES,slightly implemented,Local,Europe
REALU vs. REDD+: Carbon and biodiversity in the Afromontane landscapes of SW Ethiopia,Vanderhaegen K.; Verbist B.; Hundera K.; Muys B.,2015,Carbon and Nitrogen compounds,Regulating,Agriculture as supplier of ES,fully implemented,Regional,Sub-Saharan Africa
Reconciling Intragenerational and Intergenerational Environmental Justice in Philippine Agriculture: The MASIPAG Farmer Network,Sievers-Glotzbach S.,2014,"Biodiversity, Pollination, Pest Control, Conservation",Provisioning,Agriculture as supplier of ES,fully implemented,Global,Asia
Reconciling productivity with protection of the environment: Is temperate agroforestry the answer?,Smith J.; Pearce B.D.; Wolfe M.S.,2013,Carbon and Nitrogen compounds,Regulating,Agriculture as supplier of ES,fully implemented,,
Regional problems need integrated solutions: Pest management and conservation biology in agroecosystems,Cumming G.S.; Spiesman B.J.,2006,"Biodiversity, Pollination, Pest Control, Conservation",Regulating,Several,slightly implemented,,
Regulation of the mycotoxin deoxynivalenol by Folsomia candida (Collembola) and Aphelenchoides saprophilus (Nematoda) in an on-farm experiment,Wolfarth F.; Wedekind S.; Schrader S.; Oldenburg E.; Brunotte J.,2015,Soil,Provisioning,Agriculture as supplier of ES,fully implemented,Global,
"Relationships among bulk soil physicochemical, biochemical, and microbiological parameters in an organic alfalfa-rice rotation system",Lopes A.R.; Bello D.; Prieto-Fernàndez .; Trasar-Cepeda C.; Manaia C.M.; Nunes O.C.,2015,"Biodiversity, Pollination, Pest Control, Conservation",Regulating,Agriculture as supplier of ES,slightly implemented,Local,Europe
Replacing natural wetlands with stormwater management facilities: Biophysical and perceived social values,Rooney R.C.; Foote L.; Krogman N.; Pattison J.K.; Wilson M.J.; Bayley S.E.,2015,Water,Regulating,Agriculture causes negative effects,slightly implemented,Regional,North America
Resource use and benefits of mixed farming approach in arecanut ecosystem in India,Sujatha S.; Bhat R.,2015,Other articles,Several,Several,slightly implemented,Local,Asia
Restoration of Biodiversity and Ecosystem Services on Agricultural Land,Rey Benayas J.M.; Bullock J.M.,2012,"Biodiversity, Pollination, Pest Control, Conservation",Regulating,Agriculture as supplier of ES,fully implemented,,
Rewilding Abandoned Landscapes in Europe,Navarro L.M.; Pereira H.M.,2012,"Policy, Institutions, Governmental",Several,Several,fully implemented,Regional,Europe
"Rice and duck, a good combination? Identifying the incentives and triggers for joint rice farming and wild duck conservation",Pernollet C.A.; Simpson D.; Gauthier-Clerc M.; Guillemain M.,2015,"Biodiversity, Pollination, Pest Control, Conservation",Several,Several,slightly implemented,Global,
Riparian field margins: Can they enhance the functional structure of ground beetle (Coleoptera: Carabidae) assemblages in intensively managed grassland landscapes?,Cole L.J.; Brocklehurst S.; Elston D.A.; McCracken D.I.,2012,"Biodiversity, Pollination, Pest Control, Conservation",Regulating,Agriculture causes negative effects,not implemented,Local,Europe
Role of native bees and natural habitats in eggplant (Solanum melongena) pollination in Kenya,Gemmill-Herren B.; Ochieng' A.O.,2008,"Biodiversity, Pollination, Pest Control, Conservation",Regulating,Agriculture as user of ES,fully implemented,Local,Sub-Saharan Africa
Roosting behaviour of a migratory songbird on Jamaican coffee farms: Landscape composition may affect delivery of an ecosystem service,Jirinec V.; Campos B.R.; Johnson M.D.,2011,"Biodiversity, Pollination, Pest Control, Conservation",Several,Agriculture as supplier of ES,slightly implemented,Local,Latin America
Satoyama-satoumi sub-global assessment in Japan and involvement of the Hokkaido Cluster,Morimoto J.; Kondo T.; Miyauchi T.,2009,"Assessment, Cultural Services",Several,Several,fully implemented,Regional,Asia
Selection of floral resources to optimise conservation of agriculturally-functional insect groups,Carri_ R.J.G.; George D.R.; W_ckers F.L.,2012,"Biodiversity, Pollination, Pest Control, Conservation",Regulating,Agriculture as user of ES,slightly implemented,Local,Europe
Semi-natural vegetation in agricultural land: European map and links to ecosystem service supply,GarcÕa-Feced C.; Weissteiner C.J.; Baraldi A.; Paracchini M.L.; Maes J.; Zulian G.; Kempen M.; Elbersen B.; P_rez-Soba M.,2014,"Policy, Institutions, Governmental",Several,Several,fully implemented,Regional,Europe
Semi-subsistence farming: An elusive concept posing thorny policy questions,Davidova S.,2011,"Policy, Institutions, Governmental",Several,Agriculture as supplier of ES,slightly implemented,Regional,Europe
Shade coffee: Update on a disappearing refuge for biodiversity,Jha S.; Bacon C.M.; Philpott S.M.; MÄndez V.E.; LÛderach P.; Rice R.A.,2014,"Biodiversity, Pollination, Pest Control, Conservation",Several,Several,fully implemented,Global,
"Shifting cultivation, forest fallow, and externalities in ecosystem services: Evidence from the Eastern Amazon",Klemick H.,2011,"Policy, Institutions, Governmental",Several,Agriculture as user of ES,fully implemented,Local,Latin America
Should payments for biodiversity conservation be based on action or results?,Gibbons J.M.; Nicholson E.; Milner-Gulland E.J.; Jones J.P.G.,2011,"Policy, Institutions, Governmental",Regulating,Several,fully implemented,Local,
Significance and value of non-traded ecosystem services on farmland,Sandhu H.; Wratten S.; Costanza R.; Pretty J.; Porter J.R.; Reganold J.,2015,Other articles,Regulating,Agriculture as user of ES,fully implemented,Local,Australia and New Zealand
Simple-but-sound methods for estimating the value of changes in biodiversity for biological pest control in agriculture,Letourneau D.K.; Ando A.W.; Jedlicka J.A.; Narwani A.; Barbier E.,2015,"Biodiversity, Pollination, Pest Control, Conservation",Regulating,Several,not implemented,Regional,North America
Simulated climate-warming increases Coleoptera activity-densities and reduces community diversity in a cereal crop,Berthe S.C.F.; Derocles S.A.P.; Lunt D.H.; Kimball B.A.; Evans D.M.,2015,"Biodiversity, Pollination, Pest Control, Conservation",Provisioning,Agriculture as supplier of ES,not implemented,Local,Europe
Small-scale traditional management of highly species-rich grasslands in the Carpathians,Babai D.; Molnàr Z.,2014,"Biodiversity, Pollination, Pest Control, Conservation",Regulating,Agriculture as supplier of ES,not implemented,Regional,Europe
Social-ecological and regional adaptation of agrobiodiversity management across a global set of research regions,Jackson L.E.; Pulleman M.M.; Brussaard L.; Bawa K.S.; Brown G.G.; Cardoso I.M.; de Ruiter P.C.; GarcÕa-Barrios L.; Hollander A.D.; Lavelle P.; Ou_draogo E.; Pascual U.; Setty S.; Smukler S.M.; Tscharntke T.; Van Noordwijk M.,2012,"Biodiversity, Pollination, Pest Control, Conservation",Several,Several,slightly implemented,Global,Europe
Social-ecological traps and transformations in dryland agro-ecosystems: Using water system innovations to change the trajectory of development,Enfors E.,2013,Water,Provisioning,Agriculture as supplier of ES,slightly implemented,Regional,Sub-Saharan Africa
Socio-cultural and economic valuation of ecosystem services provided by Mediterranean mountain agroecosystems,Bernu_s A.; RodrÕguez-Ortega T.; Ripoll-Bosch R.; Alfnes F.,2014,"Assessment, Cultural Services",Several,Agriculture as supplier of ES,fully implemented,Regional,Europe
"Soil Arthropod Diversity in Organic, Integrated, and Conventional Olive Orchards and Different Agroecological Zones in Crete, Greece",Gkisakis V.D.; Kollaros D.; Börberi P.; Livieratos I.C.; Kabourakis E.M.,2015,"Biodiversity, Pollination, Pest Control, Conservation",Provisioning,Agriculture as supplier of ES,fully implemented,Local,Europe
"Soil biota, ecosystem services and land productivity",Barrios E.,2007,Soil,Provisioning,Agriculture as supplier of ES,fully implemented,Global,
Soil carbon lost from Mollisols of the North Central U.S.A. with 20 years of agricultural best management practices,Sanford G.R.; Posner J.L.; Jackson R.D.; Kucharik C.J.; Hedtcke J.L.; Lin T.-L.,2012,Carbon and Nitrogen compounds,Regulating,Agriculture causes negative effects,not implemented,Regional,North America
Soil ecosystem services and land use in the rapidly changing orinoco river basin of colombia,Lavelle P.; RodrÕguez N.; Arguello O.; Bernal J.; Botero C.; Chaparro P.; GÑmez Y.; Guti_rrez A.; Hurtado M.D.P.; Loaiza S.; Pullido S.X.; RodrÕguez E.; Sanabria C.; Velàsquez E.; Fonte S.J.,2014,Soil,Provisioning,Agriculture causes negative effects,fully implemented,Regional,Latin America
Soil health in agricultural systems,Kibblewhite M.G.; Ritz K.; Swift M.J.,2008,Soil,Regulating,Agriculture as supplier of ES,fully implemented,Global,
Soil macrofauna as indicators of soil quality and land use impacts in smallholder agroecosystems of western Nicaragua,Rousseau L.; Fonte S.J.; T_llez O.; Van Der Hoek R.; Lavelle P.,2013,Soil,Regulating,Agriculture as supplier of ES,slightly implemented,Regional,Latin America
Soil management in relation to sustainable agriculture and ecosystem services,Powlson D. S.; Gregory P. J.; Whalley W. R.; Quinton J. N.; Hopkins D. W.; Whitmore A. P.; Hirsch P. R.; Goulding K. W. T.,2011,Soil,Several,Agriculture as supplier of ES,fully implemented,Global,
Soil quality improvement under an ecologically based farming system in northwest Missouri,Kremer R.J.; Hezel L.F.,2013,Soil,Regulating,Agriculture as supplier of ES,fully implemented,Local,North America
Soil science contributions towards Sustainable Development Goals and their implementation: Linking soil functions with ecosystem services,Bouma J.,2014,Soil,Regulating,Agriculture as supplier of ES,slightly implemented,Global,
Spatial complementarity of forests and farms: Accounting for ecosystem services,Pattanayak S.K.; Butry D.T.,2005,Water,Provisioning,Agriculture causes negative effects,fully implemented,Regional,Asia
Spatial covariance between biodiversity and other ecosystem service priorities,Anderson B.J.; Armsworth P.R.; Eigenbrod F.; Thomas C.D.; Gillings S.; Heinemeyer A.; Roy D.B.; Gaston K.J.,2009,"Biodiversity, Pollination, Pest Control, Conservation",Several,Several,fully implemented,Regional,Europe
Spatial interactions among ecosystem services in an urbanizing agricultural watershed,Qiu J.; Turner M.G.,2013,Water,Regulating,Agriculture causes negative effects,fully implemented,Regional,North America
"Spatial land use trade-offs for maintenance of biodiversity, biofuel, and agriculture",Behrman K.D.; Juenger T.E.; Kiniry J.R.; Keitt T.H.,2015,Other articles,Several,Several,not implemented,Regional,North America
Spatial modelling of agrarian subsidy payments as an input for evaluating changes of ecosystem services,Klug H.; Jenewein P.,2010,"Policy, Institutions, Governmental",Several,Agriculture as supplier of ES,fully implemented,Local,Europe
Spatial patterns of agricultural expansion determine impacts on biodiversity and carbon storage,Chaplin-Kramer Rebecca; Sharp Richard P.; Mandle Lisa; Sim Sarah; Johnson Justin; Butnar Isabela; Canals Lloren Milö i; Eichelberger Bradley A.; Ramler Ivan; Mueller Carina; McLachlan Nikolaus; Yousefi Anahita; King Henry; Kareiva Peter M.,2015,Carbon and Nitrogen compounds,Regulating,Agriculture causes negative effects,fully implemented,Regional,Latin America
Spatial quantification and valuation of cultural ecosystem services in an agricultural landscape,Van Berkel D.B.; Verburg P.H.,2014,"Assessment, Cultural Services",Cultural,Agriculture as supplier of ES,fully implemented,Local,Europe
Spatiotemporal variation in the relationship between landscape simplification and insecticide use,Larsen A.E.; Gaines S.D.; Deschnes O.,2015,"Biodiversity, Pollination, Pest Control, Conservation",Provisioning,Agriculture causes negative effects,not implemented,Regional,North America
Species diversity of entomophilous plants and flower-visiting insects is sustained in the field margins of sunflower crops,Torretta J.P.; Poggio S.L.,2013,"Biodiversity, Pollination, Pest Control, Conservation",Regulating,Agriculture as supplier of ES,slightly implemented,Regional,Latin America
Species-rich dung beetle communities buffer ecosystem services in perturbed agro-ecosystems,Beynon S.A.; Mann D.J.; Slade E.M.; Lewis O.T.,2012,"Biodiversity, Pollination, Pest Control, Conservation",Regulating,Agriculture as user of ES,fully implemented,Local,Europe
Stability of pollination services decreases with isolation from natural areas despite honey bee visits,Garibaldi L.A.; Steffan-Dewenter I.; Kremen C.; Morales J.M.; Bommarco R.; Cunningham S.A.; Carvalheiro L.G.; Chacoff N.P.; Dudenh_ffer J.H.; Greenleaf S.S.; Holzschuh A.; Isaacs R.; Krewenka K.; Mandelik Y.; Mayfield M.M.; Morandin L.A.; Potts S.G.; Ricketts T.H.; Szentgy_rgyi H.; Viana B.F.; Westphal C.; Winfree R.; Klein A.M.,2011,"Biodiversity, Pollination, Pest Control, Conservation",Regulating,Several,fully implemented,Global,
Stakeholder perceptions of the effectiveness and efficiency of agri-environment schemes in enhancing pollinators on farmland,Austin Z.; Penic M.; Raffaelli D.G.; White P.C.L.,2015,"Biodiversity, Pollination, Pest Control, Conservation",Regulating,Agriculture as supplier of ES,slightly implemented,Local,Europe
Strategies and economics of farming systems with coffee in the Atlantic Rainforest Biome,de Souza H.N.; de Graaff J.; Pulleman M.M.,2012,"Biodiversity, Pollination, Pest Control, Conservation",Several,Agriculture as supplier of ES,fully implemented,Local,Latin America
Striking a new balance between agricultural production and biodiversity,Firbank L.G.,2005,"Biodiversity, Pollination, Pest Control, Conservation",Several,Several,not implemented,Regional,Europe
Supply of an ecosystem service-Farmers' willingness to adopt riparian buffer zones in agricultural catchments,Buckley C.; Hynes S.; Mechan S.,2012,Other articles,Regulating,Agriculture causes negative effects,fully implemented,Regional,Europe
Supply of carbon sequestration and biodiversity services from Australia's agricultural land under global change,Bryan B.A.; Nolan M.; Harwood T.D.; Connor J.D.; Navarro-Garcia J.; King D.; Summers D.M.; Newth D.; Cai Y.; Grigg N.; Harman I.; Crossman N.D.; Grundy M.J.; Finnigan J.J.; Ferrier S.; Williams K.J.; Wilson K.A.; Law E.A.; Hatfield-Dodds S.,2014,Carbon and Nitrogen compounds,Regulating,Agriculture as supplier of ES,fully implemented,Regional,Australia and New Zealand
Supporting wild pollinators in a temperate agricultural landscape: Maintaining mosaics of natural features and production,Lentini P.E.; Martin T.G.; Gibbons P.; Fischer J.; Cunningham S.A.,2012,"Biodiversity, Pollination, Pest Control, Conservation",Regulating,Agriculture causes negative effects,slightly implemented,Local,Australia and New Zealand
"Surface-active arthropods in organic vineyards, integrated vineyards and natural habitat in the Cape Floristic Region",Gaigher R.; Samways M.J.,2010,"Biodiversity, Pollination, Pest Control, Conservation",Regulating,Agriculture as supplier of ES,fully implemented,Local,Sub-Saharan Africa
Sustainability and place: How emerging mega-trends of the 21st century will affect humans and nature at the landscape level,Day J.W.; Moerschbaecher M.; Pimentel D.; Hall C.; YàÐez-Arancibia A.,2014,Climate,Provisioning,Agriculture as user of ES,slightly implemented,Regional,North America
"Sustainable agriculture and forestry in mountain regions: The ""mountland"" project",Huber R.; Walz A.; Rigling A.,2012,"Policy, Institutions, Governmental",Several,Agriculture as supplier of ES,fully implemented,Local,Europe
Sustainable and resource efficient intensivation of crop production - Perspectives of agro-ecosystem research policy paper of the DFG senate commission on agroecosystem research,Wolters V.; Isselstein J.; StÙtzel H.; Ordon F.; von Haaren C.; Schlecht E.; Wesseler J.; Birner R.; von LÙtzow M.; BrÙggemann N.; DiekkrÙger B.; Fangmeier A.; Flessa H.; Kage H.; Kaupenjohann M.; K_gel-Knabner I.; Mosandl R.; Seppelt R.,2014,"Policy, Institutions, Governmental",Several,Agriculture as supplier of ES,slightly implemented,Global,Europe
Sustainable intensification and ecosystem services: New directions in agricultural governance,Fish R.; Winter M.; Lobley M.,2014,"Policy, Institutions, Governmental",Several,Several,fully implemented,Regional,Europe
Sustaining Working Rangelands: Insights from Rancher Decision Making,Roche L.M.; Schohr T.K.; Derner J.D.; Lubell M.N.; Cutts B.B.; Kachergis E.; Eviner V.T.; Tate K.W.,2015,"Policy, Institutions, Governmental",Several,Agriculture as supplier of ES,slightly implemented,Regional,North America
"Tapping unsustainable groundwater stores for agricultural production in the High Plains Aquifer of Kansas, projections to 2110",Steward D.R.; Bruss P.J.; Yang X.; Staggenborg S.A.; Welch S.M.; Apley M.D.,2013,Water,Provisioning,Agriculture as user of ES,not implemented,Regional,North America
Targeting perennial vegetation in agricultural landscapes for enhancing ecosystem services,Asbjornsen H.; Hernandez-Santana V.; Liebman M.; Bayala J.; Chen J.; Helmers M.; Ong C.K.; Schulte L.A.,2014,"Biodiversity, Pollination, Pest Control, Conservation",Several,Several,fully implemented,,
Termite diversity and complexity in Vietnamese agroecosystems along a gradient of increasing disturbance,Neoh K.-B.; Bong L.-J.; Nguyen M.T.; Nguyen V.T.; Nguyen H.Q.; Itoh M.; Kozan O.; Yoshimura T.,2015,"Biodiversity, Pollination, Pest Control, Conservation",Regulating,Agriculture causes negative effects,slightly implemented,Regional,Asia
The 'squeezed middle': Identifying and addressing conflicting demands on intermediate quality farmland in Scotland,Slee B.; Brown I.; Donnelly D.; Gordon I.J.; Matthews K.; Towers W.,2014,"Policy, Institutions, Governmental",Several,Agriculture as supplier of ES,fully implemented,Regional,Europe
The alignment of agricultural and nature conservation policies in the European Union,Hodge I.; Hauck J.; Bonn A.,2015,"Policy, Institutions, Governmental",Several,Several,fully implemented,Regional,Europe
The application of an ecosystem services framework to estimate the economic value of dung beetles to the U.K. cattle industry,Beynon S.A.; Wainwright W.A.; Christie M.,2015,"Biodiversity, Pollination, Pest Control, Conservation",Regulating,Agriculture as supplier of ES,fully implemented,Regional,Europe
"The Biosphere Reserve Andean Belt, Colombia. Any region model of adaptation strategies to climate change and sustainable regional development?",Borsdorf A.; Mergili M.; Ortega L.A.,2013,"Biodiversity, Pollination, Pest Control, Conservation",Provisioning,Agriculture as user of ES,slightly implemented,Local,Latin America
The challenges and implications of linking wetland science to policy in agricultural landscapes - experience from the UK National Ecosystem Assessment,Maltby E.; Acreman M.; Blackwell M.S.A.; Everard M.; Morris J.,2013,"Policy, Institutions, Governmental",Several,Agriculture as supplier of ES,slightly implemented,Regional,Europe
The conservation and restoration of wild bees,Winfree R.,2010,"Biodiversity, Pollination, Pest Control, Conservation",Regulating,Agriculture as supplier of ES,fully implemented,,
The contribution of non-managed social bees to coffee production: New economic insights based on farm-scale yield data,Veddeler D.; Olschewski R.; Tscharntke T.; Klein A.-M.,2008,"Biodiversity, Pollination, Pest Control, Conservation",Regulating,Agriculture as user of ES,fully implemented,Local,Latin America
The contribution of plant species with a steady-state flowering phenology to native bee conservation and bee pollination services,Peters V.E.; Carroll C.R.; Cooper R.J.; Greenberg R.; Solis M.,2013,"Biodiversity, Pollination, Pest Control, Conservation",Regulating,Several,fully implemented,Local,Latin America
The debate over sustainable intensification,Godfray H.C.J.,2015,Other articles,,Agriculture causes negative effects,not implemented,,
The Dependence of Crops for Pollinators and the Economic Value of Pollination in Brazil,Giannini T.C.; Cordeiro G.D.; Freitas B.M.; Saraiva A.M.; Imperatriz-Fonseca V.L.,2015,"Biodiversity, Pollination, Pest Control, Conservation",Regulating,Agriculture as user of ES,fully implemented,Regional,Latin America
The ecology and ecosystem services of native trees: Implications for reforestation and land restoration in Mesoamerica,Hall J.S.; Ashton M.S.; Garen E.J.; Jose S.,2011,"Biodiversity, Pollination, Pest Control, Conservation",Regulating,Agriculture causes negative effects,fully implemented,Regional,Latin America
The economics of rural and agricultural ecosystem services: Purism versus practicality,Bauer D.M.; Johnston R.J.,2013,"Policy, Institutions, Governmental",,,fully implemented,,
The effect of agricultural diversity and crop choice on functional capacity change in grassland conversions,Lin B.B.; Flynn D.F.B.; Bunker D.E.; Uriarte M.; Naeem S.,2011,"Biodiversity, Pollination, Pest Control, Conservation",Provisioning,Agriculture as user of ES,slightly implemented,Local,North America
"The Effects of Cropping Systems on Avian Communities in Cacao and Banana Agro-Forestry Systems of Talamanca, Costa Rica",Wilsey C.B.; Temple S.A.,2011,"Biodiversity, Pollination, Pest Control, Conservation",Regulating,Agriculture as user of ES,slightly implemented,Local,Latin America
The effects of forest fragmentation on bee communities in tropical countryside,Brosi B.J.; Daily G.C.; Shih T.M.; Oviedo F.; Duràn G.,2008,"Biodiversity, Pollination, Pest Control, Conservation",Regulating,Agriculture causes negative effects,not implemented,Local,Latin America
The future of agriculture and society in Iowa: Four scenarios,Jarchow M.E.; Kubiszewski I.; Larsen G.L.D.; Zdorkowski G.; Costanza R.; Gailans S.R.; Ohde N.; Dietzel R.; Kaplan S.; Neal J.; Petrehn M.R.; Gunther T.; D'Adamo S.N.; McCann N.; Larson A.; Damery P.; Gross L.; Merriman M.; Post J.; Sheradin M.; Liebman M.,2012,"Policy, Institutions, Governmental",Several,Several,fully implemented,Local,North America
The future of farming: The value of ecosystem services in conventional and organic arable land. An experimental approach,Sandhu H.S.; Wratten S.D.; Cullen R.; Case B.,2008,Other articles,Several,Several,fully implemented,Local,Australia and New Zealand
The governance of rural land in a liberalised world,Hodge I.,2007,"Policy, Institutions, Governmental",Several,Several,fully implemented,Regional,Europe
The impact of an insecticide on insect flower visitation and pollination in an agricultural landscape,Brittain C.; Bommarco R.; Vighi M.; Barmaz S.; Settele J.; Potts S.G.,2010,"Biodiversity, Pollination, Pest Control, Conservation",Regulating,Several,fully implemented,Local,Europe
The impact of prairie strips on aphidophagous predator abundance and soybean aphid predation in agricultural catchments,Cox R.; O'neal M.; Hessel R.; Schulte L.A.; Helmers M.,2014,"Biodiversity, Pollination, Pest Control, Conservation",Regulating,Several,fully implemented,Local,North America
The impact of projected increases in urbanization on ecosystem services,Eigenbrod F.; Bell V.A.; Davies H.N.; Heinemeyer A.; Armsworth P.R.; Gaston K.J.,2011,Carbon and Nitrogen compounds,Regulating,Agriculture causes negative effects,fully implemented,Regional,Europe
The importance of landscape and spatial structure for hymenopteran-based food webs in an agro-ecosystem,Fabian Y.; Sandau N.; Bruggisser O.T.; Aebi A.; Kehrli P.; Rohr R.P.; Naisbit R.E.; Bersier L.-F.,2013,"Biodiversity, Pollination, Pest Control, Conservation",Regulating,Agriculture as supplier of ES,slightly implemented,Regional,Europe
The importance of managing the costs and benefits of bird activity for agricultural sustainability,Triplett S.; Luck G.W.; Spooner P.,2012,"Biodiversity, Pollination, Pest Control, Conservation",Regulating,Several,slightly implemented,Global,
"The importance of natural habitats to Brazilian free-tailed bats in intensive agricultural landscapes in the Winter Garden region of Texas, United States",Davidai N.; Westbrook J.K.; Lessard J.-P.; Hallam T.G.; McCracken G.F.,2015,"Biodiversity, Pollination, Pest Control, Conservation",Regulating,Agriculture as supplier of ES,slightly implemented,Regional,North America
The influence of temporal variation on relationships between ecosystem services,Holland R.A.; Eigenbrod F.; Armsworth P.R.; Anderson B.J.; Thomas C.D.; Gaston K.J.,2011,Water,Regulating,Agriculture causes negative effects,fully implemented,Regional,Europe
"The interplay of pollinator diversity, pollination services and landscape change",Steffan-Dewenter I.; Westphal C.,2008,"Biodiversity, Pollination, Pest Control, Conservation",Regulating,Several,fully implemented,,
"The irruption of new agro-industrial technologies in Uruguay and their environmental impacts on soil, water supply and biodiversity: A review",C_spedes-Payret C.; PiÐeiro G.; Achkar M.; Gutierrez O.; Panario D.,2009,Other articles,Several,Agriculture as supplier of ES,fully implemented,Regional,Latin America
The nature of the nuisance-damage or threat-determines how perceived monetary costs and cultural benefits influence farmer tolerance of wildlife,Goodale K.; Parsons G.J.; Sherren K.,2015,"Assessment, Cultural Services",Several,Several,fully implemented,Regional,North America
The net return from animal activity in agro-ecosystems: Trading off benefits from ecosystem services against costs from crop damage,Luck G.W.,2014,"Biodiversity, Pollination, Pest Control, Conservation",Regulating,Agriculture as user of ES,fully implemented,Local,Australia and New Zealand
The place of agricultural sciences in the literature on ecosystem services,Tancoigne E.; Barbier M.; Cointet J.-P.; Richard G.,2014,Other articles,Several,Several,fully implemented,,
The potential of land conservation agreements for protection of water resources,Smith L.; Inman A.; Cherrington R.,2012,"Policy, Institutions, Governmental",Regulating,Agriculture causes negative effects,fully implemented,Local,Europe
The relationship between agricultural intensification and biological control: Experimental tests across Europe,Thies C.; Haenke S.; Scherber C.; Bengtsson J.; Bommarco R.; Clement L.W.; Ceryngier P.; Dennis C.; Emmerson M.; Gagic V.; Hawro V.; Liira J.; Weisser W.W.; Winqvist C.; Tscharntke T.,2011,"Biodiversity, Pollination, Pest Control, Conservation",Regulating,Agriculture as user of ES,not implemented,Regional,Europe
The Ridgefield Multiple Ecosystem Services Experiment: Can restoration of former agricultural land achieve multiple outcomes?,Perring M.P.; Standish R.J.; Hulvey K.B.; Lach L.; Morald T.K.; Parsons R.; Didham R.K.; Hobbs R.J.,2012,Carbon and Nitrogen compounds,Regulating,Agriculture as supplier of ES,fully implemented,Regional,Australia and New Zealand
The role of ecological models in linking ecological risk assessment to ecosystem services in agroecosystems,Galic N.; Schmolke A.; Forbes V.; Baveco H.; van den Brink P.J.,2012,"Biodiversity, Pollination, Pest Control, Conservation",Regulating,Agriculture causes negative effects,fully implemented,,
The role of farmers' property rights in soil ecosystem services conservation,Foudi S.,2012,Soil,Several,Agriculture causes negative effects,fully implemented,Global,
The role of integrating agroforestry and vegetable planting in structuring communities of herbivorous insects and their natural enemies in the Neotropical region,Harterreiten-Souza Ä.S.; Togni P.H.B.; Pires C.S.S.; Sujii E.R.,2014,"Biodiversity, Pollination, Pest Control, Conservation",Regulating,Agriculture as user of ES,slightly implemented,Regional,Latin America
"The role of rangelands in diversified farming systems: Innovations, obstacles, and opportunities in the USA",Sayre N.F.; Carlisle L.; Huntsinger L.; Fisher G.; Shattuck A.,2012,"Policy, Institutions, Governmental",Several,Agriculture as supplier of ES,slightly implemented,Regional,North America
The role of supporting ecosystem services in conventional and organic arable farmland,Sandhu H.S.; Wratten S.D.; Cullen R.,2010,Soil,Several,Agriculture as supplier of ES,fully implemented,Regional,Australia and New Zealand
The role of the Himalayan Mountain System in Food Security an Agricultural Sustainability in South Asia,Rasul G.,2010,Water,Provisioning,Agriculture causes negative effects,slightly implemented,Global,Asia
The roles and values of wild foods in agricultural systems,Bharucha Z.; Pretty J.,2010,"Biodiversity, Pollination, Pest Control, Conservation",Provisioning,Several,not implemented,,
The utility of crop genetic diversity in maintaining ecosystem services,Hajjar R.; Jarvis D.I.; Gemmill-Herren B.,2008,"Biodiversity, Pollination, Pest Control, Conservation",Regulating,Agriculture as supplier of ES,fully implemented,,
"The value of producing food, energy, and ecosystem services within an agro-ecosystem",Porter J.; Costanza R.; Sandhu H.; Sigsgaard L.; Wratten S.,2009,"Policy, Institutions, Governmental",Several,Several,fully implemented,Regional,Europe
The value of urban vacant land to support arthropod biodiversity and ecosystem services,Gardiner M.M.; Burkman C.E.; Prajzner S.P.,2013,"Biodiversity, Pollination, Pest Control, Conservation",Regulating,Agriculture as supplier of ES,slightly implemented,,
To close the yield-gap while saving biodiversity will require multiple locally relevant strategies,Cunningham S.A.; Attwood S.J.; Bawa K.S.; Benton T.G.; Broadhurst L.M.; Didham R.K.; McIntyre S.; Perfecto I.; Samways M.J.; Tscharntke T.; Vandermeer J.; Villard M.-A.; Young A.G.; Lindenmayer D.B.,2013,"Biodiversity, Pollination, Pest Control, Conservation",Several,Several,slightly implemented,,
Towards adaptive governance of common-pool mountainous agropastoral systems,Baumg_rtner J.; Tikubet G.; Gilioli G.,2010,"Policy, Institutions, Governmental",Several,Agriculture as supplier of ES,fully implemented,Local,
Towards More Efficient Incentives for Agri-environment Measures in Degraded and Eroded Vineyards,Galati A.; Gristina L.; Crescimanno M.; Barone E.; Novara A.,2015,Soil,Regulating,Agriculture causes negative effects,fully implemented,Local,Europe
"Trade-offs between biodiversity conservation and nutrients removal in wetlands of arid intensive agricultural basins: The mar menor case, Spain",MartÕnez-Fernàndez J.; Esteve-Selma M.-A.; MartÕnez-Paz J.-M.; CarreÐo M.-F.; MartÕnez-LÑpez J.; Robledano F.; FarinÑs P.,2014,"Biodiversity, Pollination, Pest Control, Conservation",Several,Several,fully implemented,Regional,Europe
Trade-offs between ecosystem services in a mountain region,Briner S.; Huber R.; Bebi P.; Elkin C.; Schmatz D.R.; Grt-Regamey A.,2013,Climate,Provisioning,Agriculture as user of ES,fully implemented,Regional,Europe
"Trade-offs between winter cover crop production and soil water depletion in the San Joaquin Valley, California",Mitchell J.P.; Shrestha A.; Irmak S.,2015,Soil,Regulating,Several,slightly implemented,Regional,North America
"Tradeoffs, synergies and traps among ecosystem services in the Lake Victoria basin of East Africa",Swallow B.M.; Sang J.K.; Nyabenge M.; Bundotich D.K.; Duraiappah A.K.; Yatich T.B.,2009,Water,Provisioning,Agriculture as user of ES,slightly implemented,Regional,Sub-Saharan Africa
Transition from Semi-Confinement to Pasture-Based Dairy in Brazil: FarmersÍ View of Economic and Environmental Performances,Alvez J.P.; Schmitt A.L. Fo.; Farley J.C.; Erickson J.D.; M_ndez V.E.,2014,"Biodiversity, Pollination, Pest Control, Conservation",Several,Several,fully implemented,Regional,Latin America
Trees in a human-modified tropical landscape: Species and trait composition and potential ecosystem services,Thijs K.W.; Aerts R.; van de Moortele P.; Aben J.; Musila W.; Pellikka P.; Gulinck H.; Muys B.,2015,"Policy, Institutions, Governmental",Several,Several,fully implemented,Local,Sub-Saharan Africa
"Tweak, adapt, or transform: Policy scenarios in response to emerging bioenergy markets in the U.S. Corn Belt",Atwell R.C.; Schulte L.A.; Westphal L.M.,2011,"Policy, Institutions, Governmental",Several,Several,slightly implemented,Regional,North America
U.S. Department of Agriculture conservation program and practice effects on wetland ecosystem services: A synthesis,Brinson M.M.; Eckles S.D.,2011,"Biodiversity, Pollination, Pest Control, Conservation",Several,Several,fully implemented,Regional,North America
Uncertainty in ecosystem services valuation and implications for assessing land use tradeoffs: An agricultural case study in the Minnesota River Basin,Johnson K.A.; Polasky S.; Nelson E.; Pennington D.,2012,"Assessment, Cultural Services",Several,Several,fully implemented,Local,North America
"Understanding linkages between ecosystem service payments, forest plantations, and export agriculture",Lansing D.M.,2013,"Policy, Institutions, Governmental",Regulating,Agriculture as supplier of ES,fully implemented,Regional,Latin America
"Understanding relationships among agro-ecosystem services based on emergy analysis in Luancheng County, North China",Ma F.; Eneji A.E.; Liu J.,2014,Other articles,Several,Several,fully implemented,Local,Asia
Unraveling the effects of payments for ecosystem services on motivations for collective action,Midler E.; Pascual U.; Drucker A.G.; Narloch U.; Soto J.L.,2015,"Policy, Institutions, Governmental",Regulating,Agriculture as supplier of ES,slightly implemented,local,Latin America
Unravelling trophic subsidies of agroecosystems for biodiversity conservation: Food consumption and nutrient recycling by waterbirds in Mediterranean rice fields,Navedo J.G.; Hahn S.; Parejo M.; Abad-GÑmez J.M.; Guti_rrez J.S.; Villegas A.; Sànchez-Guzmàn J.M.; Masero J.A.,2015,Carbon and Nitrogen compounds,Regulating,Agriculture as user of ES,slightly implemented,Regional,Europe
Urban and agricultural soils: conflicts and trade-offs in the optimization of ecosystem services,Set_l_ H.; Bardgett R. D.; Birkhofer K.; Brady M.; Byrne L.; Ruiter P. C. de; Vries F. T. de; Gardi C.; Hedlund K.; Hemerik L.; Hotes S.; Liiri M.; Mortimer S. R.; Pavao-Zuckerman M.; Pouyat R.; Tsiafouli M.; Putten W. H. van der,2013,Soil,Provisioning,Agriculture as supplier of ES,fully implemented,Regional,
Urban cultivation in allotments maintains soil qualities adversely affected by conventional agriculture,Edmondson J.L.; Davies Z.G.; Gaston K.J.; Leake J.R.,2014,Carbon and Nitrogen compounds,Regulating,Agriculture causes negative effects,fully implemented,Regional,Europe
Urban home food gardens in the Global North: Research traditions and future directions,Taylor J.R.; Lovell S.T.,2014,Other articles,Several,Several,slightly implemented,Local,North America
"Urban home gardens in the Global North: A mixed methods study of ethnic and migrant home gardens in Chicago, IL",Taylor J.R.; Lovell S.T.,2015,Other articles,Several,Several,slightly implemented,Local,North America
Use of provisioning ecosystem services drives loss of functional traits across land use intensification gradients in tropical forests in Madagascar,Brown K.A.; Johnson S.E.; Parks K.E.; Holmes S.M.; Ivoandry T.; Abram N.K.; Delmore K.E.; Ludovic R.; Andriamaharoa H.E.; Wyman T.M.; Wright P.C.,2013,"Biodiversity, Pollination, Pest Control, Conservation",Several,Several,fully implemented,Regional,Asia
Using functional traits to quantify the value of plant communities to invertebrate ecosystem service providers in arable landscapes,Storkey J.; Brooks D.; Haughton A.; Hawes C.; Smith B.M.; Holland J.M.,2013,"Biodiversity, Pollination, Pest Control, Conservation",Several,Several,slightly implemented,Local,Europe
Using participatory scenario planning to identify ecosystem services in changing landscapes,Malinga R.; Gordon L.J.; Lindborg R.; Jewitt G.,2013,"Assessment, Cultural Services",Several,Several,fully implemented,Local,Sub-Saharan Africa
Using stated preference techniques to value four key ecosystem services on New Zealand arable land,Takatsuka Y.; Cullen R.; Wilson M.; Wratten S.,2009,"Assessment, Cultural Services",Provisioning,Agriculture as supplier of ES,fully implemented,Local,Australia and New Zealand
Using systems-based life cycle assessment to investigate the environmental and economic impacts and benefits of the livestock sector in the UK,Chatterton J.; Graves A.; Audsley E.; Morris J.; Williams A.,2015,"Assessment, Cultural Services",Several,Several,fully implemented,Regional,Europe
Utilisation of agri-environment scheme habitats to enhance invertebrate ecosystem service providers,Holland J.M.; Storkey J.; Lutman P.J.W.; Birkett T.C.; Simper J.; Aebischer N.J.,2014,"Biodiversity, Pollination, Pest Control, Conservation",Regulating,Agriculture as supplier of ES,slightly implemented,Regional,Europe
Utilizing and conserving agrobiodiversity in agricultural landscapes,Jackson L.E.; Pascual U.; Hodgkin T.,2007,"Biodiversity, Pollination, Pest Control, Conservation",Regulating,Agriculture as supplier of ES,slightly implemented,Global,Europe
Valuation of ecosystem services from rural landscapes using agricultural land prices,Ma S.; Swinton S.M.,2011,"Policy, Institutions, Governmental",Several,Several,fully implemented,Local,North America
Valuation of fragile agro-ecosystem services in the Loess region: A case study of Ansai county in China,Dong X.-B.; Gao W.-S.; Chen Y.-Q.; Liang W.-L.,2007,"Assessment, Cultural Services",Several,Several,fully implemented,Local,Asia
Value and provision of ecosystem services from prairie wetlands: A choice experiment approach,Dias V.; Belcher K.,2015,"Policy, Institutions, Governmental",Several,Agriculture as supplier of ES,fully implemented,Local,North America
Valuing Climate Change Effects Upon UK Agricultural GHG Emissions: Spatial Analysis of a Regulating Ecosystem Service,Abson D.J.; Termansen M.; Pascual U.; Aslam U.; Fezzi C.; Bateman I.,2014,Climate,Regulating,Agriculture as supplier of ES,fully implemented,Local,Europe
"Valuing cultural ecosystem services: Agricultural heritage in Chilo_ island, southern Chile",Barrena J.; Nahuelhual L.; Bàez A.; Schiappacasse I.; Cerda C.,2014,"Assessment, Cultural Services",Cultural,Agriculture as supplier of ES,fully implemented,Local,Latin America
Valuing deer hunting ecosystem services from farm landscapes,Knoche S.; Lupi F.,2007,"Biodiversity, Pollination, Pest Control, Conservation",Several,Several,slightly implemented,Regional,North America
Valuing mangrove ecosystem services: Linking nutrient retention function of mangrove forests to enhanced agroecosystem production,Hussain S.A.; Badola R.,2008,"Assessment, Cultural Services",Regulating,Agriculture as user of ES,fully implemented,Local,Asia
Valuing nature-conservation interests on agricultural floodplains,Rouquette J.R.; Posthumus H.; Gowing D.J.G.; Tucker G.; Dawson Q.L.; Hess T.M.; Morris J.,2009,"Assessment, Cultural Services",Regulating,Agriculture as supplier of ES,not implemented,Regional,Europe
Valuing pollination services to agriculture,Winfree R.; Gross B.J.; Kremen C.,2011,"Biodiversity, Pollination, Pest Control, Conservation",Regulating,Agriculture as user of ES,fully implemented,Local,North America
Valuing Provisioning Ecosystem Services in Agriculture: The Impact of Climate Change on Food Production in the United Kingdom,Fezzi C.; Bateman I.; Askew T.; Munday P.; Pascual U.; Sen A.; Harwood A.,2014,Climate,Provisioning,Agriculture as user of ES,fully implemented,Regional,Europe
Valuing Supporting Soil Ecosystem Services in Agriculture: A Natural Capital Approach,Brady Mark V.; Hedlund Katarina; Cong Rong-Gang; Hemerik Lia; Hotes Stefan; Machado Stephen; Mattsson Lennart; Schulz Elke; Thomsen Ingrid K.,2015,Soil,Regulating,Agriculture as supplier of ES,fully implemented,Global,
Variation in carbon storage among tree species: Implications for the management of a small-scale carbon sink project,Kirby K.R.; Potvin C.,2007,Carbon and Nitrogen compounds,Several,Agriculture causes negative effects,fully implemented,Regional,Latin America
Vegetated canals mitigate nitrogen surplus in agricultural watersheds,Castaldelli G.; Soana E.; Racchetti E.; Vincenzi F.; Fano E.A.; Bartoli M.,2015,Carbon and Nitrogen compounds,Regulating,Agriculture causes negative effects,not implemented,Regional,Europe
Voluntary approaches to environmental protection and resource management,Segerson K.,2013,"Policy, Institutions, Governmental",Several,Several,fully implemented,Global,
Water for forests to restore environmental services and alleviate poverty in Vietnam: A farm modeling approach to analyze alternative PES programs,Jourdain D.; Boere E.; van den Berg M.; Dang Q.D.; Cu T.P.; Affholder F.; Pandey S.,2014,"Policy, Institutions, Governmental",Several,Several,slightly implemented,Local,Asia
Water quality and planktonic microbial assemblages of isolated wetlands in an agricultural landscape,Atkinson C.L.; Golladay S.W.; First M.R.,2011,Water,Regulating,Agriculture causes negative effects,slightly implemented,Local,North America
Water resource protection in Australia: Links between land use and river health with a focus on stubble farming systems,Bowmer K.H.,2011,Water,Regulating,Agriculture causes negative effects,fully implemented,Regional,Australia and New Zealand
Watershed services payments to smallholders in the Brazilian Amazon: Challenges and perspectives,Figueiredo R.O.; B_rner J.; Davidson E.A.,2013,Water,Regulating,Agriculture causes negative effects,fully implemented,Regional,Latin America
Weed seed predation increases with vegetation cover in perennial forage crops,Meiss H.; Le Lagadec L.; Munier-Jolain N.; Waldhardt R.; Petit S.,2010,"Biodiversity, Pollination, Pest Control, Conservation",Regulating,Agriculture as user of ES,fully implemented,Local,Europe
Weeds for bees? A review,Bretagnolle V.; Gaba S.,2015,"Biodiversity, Pollination, Pest Control, Conservation",Regulating,Several,fully implemented,,
Weeds in agricultural landscapes. A review,Petit S.; Boursault A.; Le Guilloux M.; Munier-Jolain N.; Reboud X.,2011,"Biodiversity, Pollination, Pest Control, Conservation",Regulating,Several,fully implemented,Global,
Wetland ecosystem services and coupled socioeconomic benefits through conservation practices in the Appalachian Region,Wardrop D.H.; Glasmeier A.K.; Peterson-Smith J.; Eckles D.; Ingram H.; Brooks R.P.,2011,"Biodiversity, Pollination, Pest Control, Conservation",Several,Several,fully implemented,Regional,North America
Wetland management in New Zealand: Are current approaches and policies sustaining wetland ecosystems in agricultural landscapes?,Myers S.C.; Clarkson B.R.; Reeves P.N.; Clarkson B.D.,2013,"Policy, Institutions, Governmental",Regulating,Agriculture causes negative effects,slightly implemented,Regional,Australia and New Zealand
What can photo-elicitation tell us about how maritime farmers perceive wetlands as climate changes?,Sherren K.; Verstraten C.,2013,Climate,Regulating,Agriculture as supplier of ES,not implemented,Local,North America
What conservationists need to know about farming,Balmford A.; Green R.; Phalan B.,2012,"Biodiversity, Pollination, Pest Control, Conservation",Several,Several,not implemented,Global,
What do we know about the effects of landscape changes on plant-pollinator interaction networks?,Ferreira P.A.; Boscolo D.; Viana B.F.,2013,"Biodiversity, Pollination, Pest Control, Conservation",Regulating,Agriculture causes negative effects,not implemented,,
What plant traits tell us: Consequences of land-use change of a traditional agro-forest system on biodiversity and ecosystem service provision,Fontana V.; Radtke A.; Walde J.; Tasser E.; Wilhalm T.; Zerbe S.; Tappeiner U.,2014,"Biodiversity, Pollination, Pest Control, Conservation",Several,Several,not implemented,Regional,Europe
When is reliance on voluntary approaches in agriculture likely to be effective?,Segerson K.,2013,"Policy, Institutions, Governmental",Several,Agriculture causes negative effects,not implemented,Global,
Why do farmers join Payments for Ecosystem Services (PES) schemes? An Assessment of PES water scheme participation in Brazil,Zanella M.A.; Schleyer C.; Speelman S.,2014,"Policy, Institutions, Governmental",Provisioning,Agriculture as supplier of ES,fully implemented,Local,Latin America
"Wild bee pollinators provide the majority of crop visitation across land-use gradients in New Jersey and Pennsylvania, USA",Winfree R.; Williams N.M.; Gaines H.; Ascher J.S.; Kremen C.,2008,"Biodiversity, Pollination, Pest Control, Conservation",Regulating,Agriculture as user of ES,fully implemented,Local,North America
Wild bee species increase tomato production and respond differently to surrounding land use in Northern California,Greenleaf S.S.; Kremen C.,2006,"Biodiversity, Pollination, Pest Control, Conservation",Regulating,Several,fully implemented,Local,North America
Wild bees enhance honey bees' pollination of hybrid sunflower,Greenleaf S.S.; Kremen C.,2006,"Biodiversity, Pollination, Pest Control, Conservation",Regulating,Several,fully implemented,Local,North America
Wild pollination services to California almond rely on semi-natural habitat,Klein A.-M.; Brittain C.; Hendrix S.D.; Thorp R.; Williams N.; Kremen C.,2012,"Biodiversity, Pollination, Pest Control, Conservation",Regulating,Agriculture as supplier of ES,fully implemented,Regional,North America
"Wildlife-friendly farming benefits rare birds, bees and plants",Pywell R.F.; Heard M.S.; Bradbury R.B.; Hinsley S.; Nowakowski M.; Walker K.J.; Bullock J.M.,2012,"Policy, Institutions, Governmental",Several,Agriculture as supplier of ES,slightly implemented,Regional,Europe
Wildlife-friendly farming increases crop yield: Evidence for ecological intensification,Pywell R.F.; Heard M.S.; Woodcock B.A.; Hinsley S.; Ridding L.; Nowakowski M.; Bullock J.M.,2015,"Biodiversity, Pollination, Pest Control, Conservation",Regulating,Several,fully implemented,Local,Europe
"Willingness to pay for aesthetics associated with field windbreaks in Iowa, United States",Grala R.K.; Tyndall J.C.; Mize C.W.,2012,"Assessment, Cultural Services",Several,Agriculture as supplier of ES,fully implemented,Local,North America
